# Supplementary material for: Virus-specific host responses and gene signatures following infection with major SARS-CoV-2 variants of concern: role of ZBP1 in viral clearance and lung inflammation
Source: Front Immunol. 2025 May 9;16:1557535. doi: 10.3389/fimmu.2025.1557535 (PMC12098559; doi:10.3389/fimmu.2025.1557535)
Supplement: Supplementary file 1 [file Table1.xlsx]

## Sheet: STable1. Wuhan 3dpi
GeneID	Log2 Fold Change	FDR Value
Cxcl10	7.43383	7.0626e-08
Amy2a5	6.83329	1.53039e-08
Ctrb1	6.78988	8.49632e-07
Cela2a	6.67014	1.72854e-07
Try4	6.41518	7.0626e-08
Rsad2	6.13877	4.22299e-09
Pnlip	6.04917	9.92871e-08
Prss2	5.85268	3.73015e-07
Irf7	5.79837	5.40026e-14
Cela3b	5.75564	9.92736e-08
Saa3	5.70397	2.21206e-06
Try5	5.57084	1.34074e-07
Zg16	5.54096	5.23906e-08
Cpa1	5.5383	1.85794e-07
Cela1	5.51467	1.95108e-07
Mx1	5.47492	3.17498e-09
Cel	5.46168	8.499e-08
2210010C04Rik	5.44682	7.0626e-08
Ctrl	5.32717	3.00297e-07
Slfn4	5.30706	1.28763e-06
Cpb1	5.17415	1.56885e-07
Clps	5.08216	2.3335e-07
Ifi204	4.99518	4.79831e-07
Oas3	4.92112	6.80927e-10
Sycn	4.87458	2.40437e-07
Ly6i	4.86993	6.0194e-08
Oasl1	4.83685	1.37088e-06
Isg15	4.82617	1.51257e-07
Ifit1	4.78568	9.49804e-11
Ifit2	4.78305	1.51257e-07
Cxcl9	4.70016	6.6281e-06
Ccl2	4.69722	0.00010791
Akp3	4.6883	1.18862e-07
Zbp1	4.67621	7.77857e-08
Ifit3	4.66301	3.45574e-11
Cpa2	4.59789	2.3335e-07
Rnase1	4.57828	5.67734e-07
Ifit3b	4.55425	2.90902e-10
Amy2b	4.51038	6.09407e-08
Apod	4.45543	1.11259e-07
Mnda	4.38652	3.38758e-06
Gm12250	4.34342	3.61333e-06
Ifi205	4.25845	1.32672e-05
Reg1	4.25054	6.56324e-07
Ifi44	4.19664	9.36666e-08
Prap1	4.13232	7.05999e-07
Oas1g	4.09076	1.3679e-07
Ccl7	3.99038	0.00461196
Apol9a	3.96152	3.36645e-09
Oas1a	3.93061	1.03071e-06
Gbp10	3.92735	4.7857e-06
Gbp5	3.92625	8.87943e-06
Ifit1bl1	3.86878	6.36554e-07
Dhx58	3.85573	2.23378e-07
Phf11a	3.84288	2.38496e-06
Mx2	3.82792	6.82824e-09
Iigp1	3.79803	1.37414e-06
Oasl2	3.79294	1.39518e-07
Ms4a4c	3.7881	0.0011248
Pnliprp1	3.78261	2.60105e-05
Cfb	3.78036	1.51257e-07
Cd274	3.76405	7.05999e-07
Tgtp1	3.75314	2.32831e-06
Apol9b	3.75244	3.17498e-09
Fcgr1	3.67808	5.61901e-05
Slfn1	3.6744	1.56485e-05
Gbp6	3.63367	8.49266e-06
Usp18	3.61504	1.95344e-07
Siglec1	3.61378	8.74185e-09
Gzmb	3.601	0.000941997
Gm5431	3.57142	1.11974e-07
Ccl4	3.55776	0.000311467
Acod1	3.53457	2.04022e-05
Apoa1	3.52672	1.01379e-05
Slfn8	3.51487	1.28763e-06
Gm4951	3.50679	2.3335e-07
Ddx60	3.47611	1.19139e-08
Igtp	3.46269	1.73656e-06
Gbp3	3.45792	1.33245e-06
Ly6c2	3.44005	3.73015e-07
Spink1	3.43817	8.0203e-05
Phf11b	3.42441	1.01379e-05
Phf11d	3.4236	2.91934e-07
Il18bp	3.41909	1.0799e-06
Apoa4	3.40949	4.7857e-06
Pnliprp2	3.40308	4.48704e-07
Irgm1	3.35032	6.64938e-07
Ifi27l2a	3.34983	3.66243e-07
H2-Q9	3.33275	7.57029e-05
Cmpk2	3.32859	8.19202e-06
Ifnb1	3.32799	5.56839e-08
Fam26f	3.2768	0.00125017
Trim30a	3.27152	1.14265e-07
Herc6	3.26047	5.56658e-07
Tgtp2	3.25844	1.19434e-05
AI607873	3.25398	4.03304e-07
Nlrc5	3.23583	5.33482e-06
Alpi	3.22065	3.54254e-06
Ms4a6d	3.22062	1.72708e-05
Oas2	3.2143	1.31389e-06
Klk1	3.19438	9.2716e-05
Ms4a6c	3.17382	1.11049e-06
Ms4a6b	3.13322	1.20514e-05
Trim30d	3.12837	1.19139e-08
Slfn9	3.11226	6.14337e-07
Lgals3bp	3.06602	5.22634e-10
Cxcl13	3.06299	0.000249225
Tlr9	3.05684	0.000214691
Gbp2	3.05428	0.000757295
Gm4070	3.04929	2.65573e-06
Serpina3f	3.03232	0.00146919
Pyhin1	2.99233	0.000385031
Xcl1	2.98505	0.00302474
F830016B08Rik	2.96164	8.56101e-08
Efcab3	2.94957	3.38133e-07
Stat2	2.93586	3.4125e-07
Lilrb4a	2.93457	7.13192e-06
Stat1	2.90587	1.9289e-05
Ifi47	2.89194	0.000132516
Zbtb16	2.883	0.00664735
Rtp4	2.88069	3.91025e-08
Irgm2	2.86065	2.48973e-07
Oas1b	2.84088	3.32365e-07
Prss3	2.83052	2.2633e-06
Trex1	2.81819	2.14478e-06
Lilr4b	2.81438	1.57283e-05
Cxcl11	2.80523	0.000124256
Gbp7	2.79939	4.76474e-06
Fcgr4	2.79187	0.000350141
Saa1	2.78034	1.08053e-05
C3ar1	2.77577	0.000460593
Xdh	2.77111	3.96922e-07
Serpina3g	2.75622	0.000984373
9930111J21Rik1	2.75394	2.60105e-05
Tap1	2.72598	4.48704e-07
Plac8	2.70136	0.00176277
Ccr5	2.70114	0.00442451
Il6	2.67743	4.71966e-05
Xaf1	2.67462	1.10191e-07
Ifih1	2.66995	3.32365e-07
H2-Q5	2.65517	2.19286e-08
Ifi27l2b	2.65224	5.8979e-07
Pla1a	2.64124	1.94712e-05
H2-Q8	2.62808	1.36776e-09
Dbp	2.62175	1.81679e-05
Themis2	2.61819	0.000142182
Try10	2.61522	4.79831e-07
Sirpb1a	2.61418	2.09916e-05
Plekha4	2.60907	2.57638e-07
Ifnl2	2.60326	3.61333e-06
H2-Q6	2.59464	8.35103e-10
Olfr56	2.59178	7.62776e-06
Pydc4	2.58423	2.73657e-05
Gbp9	2.56265	0.00146232
Rgs16	2.55859	6.61168e-06
Helz2	2.54757	7.16377e-06
Ifnl3	2.54324	9.92736e-08
Dtx3l	2.54036	3.85745e-06
Daxx	2.53567	7.58699e-06
Parp14	2.53139	1.71666e-05
Cyp3a11	2.49875	8.03291e-05
Gbp4	2.49728	0.00525559
Eif2ak2	2.49295	6.61168e-06
H2-T9	2.48987	4.22299e-09
Fabp2	2.48753	0.00125371
B430306N03Rik	2.46998	1.31612e-05
H2-T23	2.45125	2.5551e-10
Gm6904	2.44833	1.56885e-07
Ddx58	2.44319	1.70597e-06
Gm12185	2.4385	0.000111243
H2-T22	2.43824	5.22634e-10
BC147527	2.43757	0.00462934
Timp1	2.43326	0.00599383
Gpr141	2.43278	0.000127052
Batf2	2.42219	0.00184395
Gbp11	2.41735	9.93878e-06
Cybb	2.39684	1.90582e-05
Lgals9	2.39025	2.34843e-06
Znfx1	2.37572	1.77965e-06
Gm11127	2.37549	0.000556463
Cd72	2.37311	0.0022921
Slfn3	2.37267	9.66779e-06
LOC100038947	2.36423	0.000124256
Cela3a	2.36387	1.18257e-06
Parp9	2.352	1.44524e-06
Epsti1	2.35162	3.3131e-05
9930111J21Rik2	2.34314	2.46671e-07
Mlkl	2.33942	0.000386612
Ubd	2.33762	0.0192646
Ifi203	2.33387	0.000124256
Ube2l6	2.33129	0.000121465
Pdia2	2.32555	0.000941997
Adap2	2.31841	0.000661249
Slc15a3	2.31244	0.000249225
AW011738	2.31178	1.71666e-05
Tff3	2.30828	0.000101448
Serpina3m	2.3054	0.0060227
Uba7	2.30473	0.000659831
Tlr13	2.3033	1.41783e-05
Cuzd1	2.30189	6.1075e-07
Trim56	2.29897	0.000554486
Thbs1	2.29819	0.000602323
Parp10	2.29812	1.20078e-05
Parp12	2.28267	4.7857e-06
Il1rn	2.28023	0.00479362
Bst2	2.27087	7.65681e-06
Cd300lf	2.26709	6.5366e-05
Psme2b	2.26156	4.18292e-05
Cd180	2.26077	0.00295251
Rasa4	2.25747	3.73015e-07
Mndal	2.25134	0.000907175
Serpina3n	2.24314	6.86734e-05
Ear3	2.23881	0.0026278
Ido1	2.23009	0.00760955
H2-T24	2.22561	0.00164159
Ch25h	2.22297	0.000615304
Il2rb	2.21601	0.00233604
Dmbt1	2.2158	2.43355e-05
Trim21	2.21353	1.28763e-06
Aldob	2.21243	0.0017032
Samd9l	2.19845	4.88276e-06
Pik3ap1	2.19475	0.0010821
Mpeg1	2.18987	3.80793e-06
Ms4a4b	2.18933	0.00468229
H2-Q4	2.1878	2.5551e-10
BC094916	2.18542	0.000277189
Lag3	2.17945	0.000336441
Fkbp5	2.17933	0.0153213
Slfn2	2.14939	0.000342214
Sirpb1b	2.149	0.000150066
Il27	2.1466	0.000276584
Cxcl1	2.14031	0.000488215
Msr1	2.13401	0.00123504
C2	2.13051	1.75524e-05
Gm8979	2.12772	2.32831e-06
Gbp8	2.12439	0.00618329
Tlr2	2.10666	9.12995e-05
Lcn2	2.09198	0.000214691
Hsh2d	2.08983	6.39034e-05
Ptafr	2.08962	0.0027454
H2-Q7	2.08278	4.7281e-05
Mir6972	2.0671	0.000676882
Sp140	2.06586	9.41081e-06
Sult6b2	2.05437	0.000125762
Ctss	2.05192	5.78676e-05
I830077J02Rik	2.05142	0.00153797
Sectm1a	2.05025	0.00225666
Gatm	2.04732	0.0208045
Sp100	2.03079	5.26989e-05
Lypd8	2.02532	0.00362303
Trafd1	2.02418	2.57299e-05
Adar	2.02103	2.23378e-07
Pim1	2.02015	0.000612124
Scimp	2.0037	0.0132587
Clec4e	1.99944	0.00374201
Gpnmb	1.98718	0.00748558
Slamf9	1.98468	0.000554892
Tgfbi	1.98155	0.0033537
Per2	1.9782	1.75516e-05
Sdc3	1.97789	3.48944e-05
Ces2c	1.97375	0.000629797
Atf3	1.96771	0.00038432
Ccl3	1.9648	0.0176104
Pirb	1.95076	0.00262258
Hap1	1.95062	7.31507e-06
H2-K1	1.94527	2.283e-10
Gm4841	1.9405	0.00607458
Pydc3	1.93711	0.0203057
Ifng	1.93424	0.0371248
Cdhr2	1.92964	0.00022584
Gm5409	1.91597	2.78662e-05
Clec7a	1.91272	0.00288051
Psmb8	1.91248	0.000133108
Slc39a2	1.90625	3.42147e-05
Lpxn	1.89419	0.00102875
Slamf7	1.88747	0.00536144
Ifit1bl2	1.8841	4.48704e-07
Csf2rb	1.88232	0.00022584
Casp4	1.88159	0.00162818
Cyp4f18	1.88057	0.000142073
Trim34a	1.87979	2.83138e-05
Lrrc25	1.8632	0.0131839
Clec4a3	1.85336	0.000172907
Slc26a4	1.85264	0.0237712
Serpine1	1.84976	1.26851e-05
Rgs1	1.84844	0.00215779
Runx3	1.84169	0.000681065
Gm5771	1.83399	6.4277e-05
Aif1	1.83131	0.0218189
Lacc1	1.82839	0.00217167
Cd68	1.81277	4.7281e-05
Cd69	1.81258	0.00461196
Tspan4	1.81246	1.90582e-05
Tnfrsf14	1.81185	0.0235825
Apobec1	1.81025	2.17066e-05
Car13	1.80801	0.000326973
Fgr	1.8076	0.0095666
Pml	1.7872	8.21922e-05
Krt20	1.77687	0.00401625
Serpini2	1.77239	7.82184e-06
Setdb2	1.77195	1.72722e-06
Sp110	1.77191	0.00176561
Gm6548	1.76892	0.000180861
Ifitm3	1.76547	0.000114619
Ear6	1.75959	0.0321594
H2-T10	1.75854	1.13829e-06
Apoc2	1.7485	0.0164166
Ctsw	1.74764	0.0202703
Ctrc	1.74631	6.00175e-06
A530064D06Rik	1.74575	9.99025e-05
Pld4	1.74406	0.000407511
Nampt	1.73584	3.91906e-05
C1rb	1.73396	1.28763e-06
Serpina3i	1.72845	0.00379554
Clca3a1	1.7282	0.00130961
Snord2	1.7281	0.024396
Sema4d	1.72673	0.00214937
6430706D22Rik	1.72251	0.041857
Lcp2	1.72243	0.0075632
Slc28a2	1.7214	0.0253502
H2-Q1	1.71795	1.11974e-07
Il10ra	1.71771	0.00103913
Gm21188	1.71762	0.0118995
Heatr9	1.71161	7.92315e-07
Tnfaip3	1.70603	0.000164459
H2-L	1.70583	2.75765e-06
Tmed6	1.70527	0.00123581
Prf1	1.70445	0.0290939
Zc3h12a	1.69651	8.26528e-05
Gzma	1.69236	0.0180712
Irf9	1.69215	9.92736e-08
Obp2a	1.69156	5.26989e-05
Amy1	1.69083	0.0142819
Slc2a6	1.68999	0.000803899
Trim12a	1.6896	8.0203e-05
B2m	1.68858	2.34873e-08
H2-K2	1.68293	0.000530318
Tor3a	1.67736	2.3335e-07
Tigit	1.67313	0.0105155
Csf1	1.6726	0.000121386
Dck	1.67246	0.00172025
Ms4a7	1.6685	0.017915
Axl	1.66121	1.68557e-07
Gm10334	1.65946	1.48141e-05
Mitd1	1.65832	2.96547e-05
Arhgef37	1.65711	1.73066e-05
Ccl5	1.65315	0.0112346
Tmem106a	1.65173	0.00493201
Pira2	1.65053	0.00182665
Adh6a	1.64807	0.000782063
Trim14	1.64576	0.000111243
Slfn5	1.64063	0.000941997
Tnfsf8	1.63592	8.96015e-07
Misp	1.63524	0.00297676
Nt5c3	1.62882	0.000573631
C4a	1.62582	3.09887e-05
Tm4sf4	1.62351	0.00329006
Arg2	1.62134	0.0127059
Cd300ld3	1.61968	0.00215998
Apol6	1.61882	0.0086206
Atp8b4	1.61617	0.00012986
Adgre1	1.61401	0.00319463
Dusp5	1.61252	5.83547e-06
Sh3bp2	1.611	0.000718614
Muc13	1.60972	0.00575626
Ncr1	1.60546	0.0165053
Cd86	1.60529	0.00632621
Slc7a8	1.6044	0.0128452
Ear12	1.60383	0.00634084
Itgb2	1.60104	0.00180924
Gvin1	1.60103	0.00223459
Isg20	1.59749	0.0025194
H2-D1	1.59732	9.10264e-09
Sectm1b	1.59698	0.0123388
Hcls1	1.594	0.00396483
Ogfr	1.5928	1.66606e-05
Gm5150	1.5919	0.00548678
Parp11	1.5891	0.00247085
Tnf	1.58579	0.000799039
Ssc5d	1.5843	2.76349e-05
Clec4a1	1.58342	0.0261891
Trim34b	1.58308	2.68731e-05
Tm4sf5	1.58218	0.0079232
C4b	1.58116	3.05154e-05
Plekho2	1.58112	0.00234379
Tcirg1	1.581	0.000229165
Tlr3	1.58	3.95789e-05
Lst1	1.57907	0.0259924
Gbgt1	1.57804	0.0134953
Trim6	1.57095	9.92871e-08
Gcg	1.56893	3.78967e-06
Slc7a5	1.56735	1.28763e-06
Nkg7	1.5647	0.0422704
Erp27	1.56458	0.00515259
Ccbe1	1.55762	1.73066e-05
Samhd1	1.5554	0.00012986
Sell	1.55386	0.0499087
C1qb	1.55382	0.0033537
Ptprc	1.55295	0.00548678
Gm17757	1.55106	0.0053815
Cd300e	1.55071	0.001534
Tnfrsf1b	1.55034	0.00372475
Havcr2	1.54712	0.000993246
Slc25a22	1.54398	0.000364233
Nfkbiz	1.54151	1.90582e-05
Itgax	1.53734	0.00525559
H2-T-ps	1.53173	6.39096e-06
Cd53	1.53152	0.00280422
Plek	1.53036	0.00225459
Psmb9	1.52914	0.00260369
Snx20	1.52758	0.0152551
Ascc3	1.52589	2.72709e-06
Orm1	1.52513	0.0148704
Mov10	1.52448	0.00125017
Coro2a	1.51978	0.000179799
Pira6	1.51967	0.00112531
Pfkfb3	1.51532	0.00017392
Myo1g	1.51416	0.00525382
Klra2	1.51292	0.00441237
Itgam	1.50487	0.0119605
H2-M3	1.50388	0.000107709
Sct	1.5027	0.000143464
Zbed6	1.50147	0.00686506
1110017D15Rik	-1.50175	0.00316204
Nxph3	-1.5052	9.4972e-05
Morn5	-1.50597	0.016981
Hs3st6	-1.50871	0.000174144
Gstm1	-1.52187	0.0211808
Dnali1	-1.5303	0.00618329
1700016K19Rik	-1.53059	0.00442728
Tstd1	-1.53441	0.0187898
Pcp4l1	-1.53807	0.0199641
Cnn1	-1.53872	0.0465525
Mlf1	-1.54415	0.00728039
Smpx	-1.55289	0.0261115
Fndc5	-1.55762	0.0113111
Acsm1	-1.56269	0.00854574
Iyd	-1.56529	0.00401678
2310034G01Rik	-1.57342	0.00372475
Sntn	-1.58833	0.014073
1810010H24Rik	-1.5927	0.013497
Rsph1	-1.59316	0.00549436
1700007G11Rik	-1.60237	0.00622732
Npr3	-1.60403	0.0423873
Mybpc3	-1.61305	0.0426716
Itgb1bp2	-1.61329	0.0179388
Upk2	-1.61644	0.00775408
Cfap77	-1.65349	0.00203077
Dynlrb2	-1.65612	0.00509929
Atp6v1b1	-1.66076	0.0303299
Spa17	-1.66331	0.00287745
Dydc2	-1.66563	0.00399509
Gm11627	-1.69156	0.00032539
Hist1h1e	-1.71176	0.00142978
Fam183b	-1.75247	0.00415291
Stmnd1	-1.75542	0.00385519
Gpx2	-1.76125	0.00182666
Scgb1c1	-1.77014	0.0143781
Dhrs7c	-1.80131	0.0416985
Serf1	-1.80731	5.78676e-05
Hsph1	-1.81681	7.75494e-06
Hist1h4h	-1.81742	9.44468e-05
Ces1g	-1.83467	0.00530649
Eln	-1.84886	0.0135553
Chad	-1.87485	0.0427658
Pon1	-1.87633	0.0466821
Wfdc1	-1.88489	1.34181e-05
Scgb1a1	-1.90201	0.00840248
Mia	-1.90331	0.000151211
Cd209a	-1.94913	0.00234182
Hrc	-1.96378	0.0259338
Asgr1	-1.98007	0.000191212
Cyp2f2	-2.01449	0.014903
Ces1f	-2.049	0.0177175
Fabp3	-2.0586	0.0259886
Npas2	-2.08467	1.32979e-07
Riiad1	-2.1196	0.000602323
Actc1	-2.13483	0.0363006
1700024G13Rik	-2.19035	0.00659636
Actn2	-2.19221	0.0411435
Spon2	-2.22097	0.0011111
Tnnt2	-2.22475	0.028833
Aldh3a1	-2.30244	0.0198669
1700007K13Rik	-2.42854	9.47306e-06
Scgb3a2	-2.45041	0.00322879
Casq2	-2.49626	0.0101967
Pgam2	-2.52052	0.0090413
Myoz2	-2.55747	0.0465833
Cox8b	-2.62667	0.0191797
Myh6	-2.63198	0.0416099
Cyp1a1	-2.63893	0.00098224
Lypd2	-2.64662	0.00184047
Csrp3	-2.66418	0.0290826
Ckmt2	-2.6678	0.0235876
Cox7a1	-2.72391	0.00582503
Tnnc1	-2.81252	0.00610039
Myl3	-2.90547	0.0242749
Ckm	-3.00744	0.0479506
Myl4	-3.07785	0.0188278
Myl7	-3.32508	0.0395296
Sln	-3.3431	0.0495909
Mb	-3.47591	0.0162752

## Sheet: STable2. Wuhan 6dpi
GeneID	Log2 Fold Change	FDR Value
Cxcl10	6.76536	1.8158e-07
Cxcl9	6.4789	2.07213e-08
Irf7	5.43164	8.89449e-14
Saa3	5.36954	3.63729e-06
Gm12250	5.12712	1.52892e-07
Iigp1	5.09797	4.91696e-09
Tgtp1	5.0056	9.86729e-09
Serpina3g	4.99494	9.00386e-08
Ubd	4.96118	6.56898e-07
Serpina3f	4.90695	6.95661e-07
Rsad2	4.87862	1.62751e-07
Zbp1	4.86854	2.04996e-08
AA467197	4.86261	6.62013e-06
Igtp	4.78575	3.83283e-09
Ifi204	4.78535	7.17871e-07
Il1r2	4.77364	3.02459e-05
Ly6i	4.58706	9.18329e-08
Pla1a	4.58349	3.68129e-10
Arg1	4.56801	2.72006e-05
Gbp10	4.56356	2.45042e-07
Fcgr4	4.52906	1.14444e-07
Irgm1	4.51096	2.18491e-09
Isg15	4.46409	3.77213e-07
Il18bp	4.44824	5.94327e-09
Mx1	4.42482	1.04019e-07
Gbp5	4.413	8.89688e-07
Cd274	4.4037	3.20894e-08
Gbp2	4.39628	2.88669e-06
Gbp6	4.38369	2.43749e-07
Gzmb	4.35178	4.03808e-05
Oas3	4.33841	5.74312e-09
Ifit3	4.29261	7.16252e-11
Tgtp2	4.29119	7.94822e-08
Ifit2	4.28613	6.70813e-07
Serpina3m	4.16652	1.2065e-06
Ms4a6d	4.11183	1.86441e-07
Mnda	4.08515	6.40557e-06
Ccl2	4.05204	0.000282006
Trem2	3.99099	1.6146e-06
Ifi205	3.98775	1.88183e-05
Ifit1	3.93457	2.28684e-09
Acod1	3.92042	2.09951e-06
Fcgr1	3.91152	1.1944e-05
Fam26f	3.89416	5.80062e-05
Lcn2	3.87728	4.52557e-09
Clca3a1	3.8596	4.50107e-10
Lilr4b	3.84385	3.32019e-08
Serpinb9b	3.80582	4.10252e-10
Ms4a6c	3.80506	2.90893e-08
Ifit3b	3.78739	6.45518e-09
Gpnmb	3.73567	1.303e-06
Ear6	3.716	4.20612e-06
Cd300lf	3.68124	4.84518e-09
Tap1	3.67904	9.67341e-10
C3ar1	3.6761	3.38784e-06
E130102H24Rik	3.65579	4.83485e-05
Fkbp5	3.6549	3.86401e-05
Oasl1	3.6474	5.57153e-05
Sprr1a	3.64292	1.86182e-05
Gm4841	3.59111	5.68068e-07
Oas1g	3.58847	1.03731e-06
Ccl7	3.58244	0.0047352
Ccr5	3.57396	7.81299e-05
Ctla4	3.56338	9.01833e-08
Lilrb4a	3.54974	1.69337e-07
C1qb	3.53502	7.59341e-09
Ctss	3.50924	3.45104e-09
Ccl4	3.50765	0.000157079
Slfn4	3.50605	0.000329325
Doc2b	3.50592	0.000215201
Apod	3.49849	3.88949e-06
Retnlg	3.49352	0.000647431
Apol9a	3.47473	3.27095e-08
Ifi47	3.45047	5.35819e-06
Gbp3	3.44823	1.01778e-06
Ly6c2	3.41409	3.07338e-07
AI607873	3.40763	1.25766e-07
Tigit	3.40299	3.58319e-07
H2-T9	3.38698	1.97563e-12
Cfb	3.38255	6.95661e-07
Arg2	3.3763	5.96073e-07
Cyp4f18	3.36081	3.83283e-09
Serpina3n	3.3095	7.36011e-08
Tarm1	3.30648	2.58993e-05
Ifng	3.30633	0.000130244
Oas1a	3.29929	1.02742e-05
Gbp4	3.29038	0.000119871
Tlr13	3.26013	1.32777e-08
H2-Q9	3.22768	5.42305e-05
Aif1	3.21893	4.49297e-05
Tmem37	3.20012	1.83809e-07
Gm4951	3.1923	9.95616e-07
Msr1	3.17957	1.59553e-06
Ms4a4a	3.16286	3.763e-08
Orm1	3.15356	7.17871e-07
Tgfbi	3.15092	4.54587e-06
Dhx58	3.14795	4.26131e-06
Mt2	3.14383	0.00011081
Ifi27l2a	3.13283	8.06668e-07
Gbp11	3.12022	5.34481e-08
Batf2	3.11983	3.35801e-05
Apol9b	3.10586	9.01833e-08
Mmp8	3.10564	6.02949e-05
Chil3	3.10412	2.53469e-06
Gbp8	3.09051	3.45539e-05
Timp1	3.08218	0.000239138
Gm11127	3.07686	5.49074e-06
Slfn1	3.05567	0.000104152
Asprv1	3.03764	0.00564322
C1qa	3.01639	3.16196e-07
Pla2g7	3.01572	6.78183e-06
Xcl1	3.00472	0.00116979
Phgr1	2.99042	3.85743e-05
Cldn4	2.9723	3.7216e-05
Tnnc2	2.96253	0.00269642
F830016B08Rik	2.95397	5.79219e-08
Pdcd1	2.95387	1.65902e-05
Apoc2	2.951	2.4877e-05
Phf11a	2.93206	9.75507e-05
H2-Q4	2.92862	8.89449e-14
Nlrc5	2.92758	1.5562e-05
Ms4a7	2.91323	1.86182e-05
Wfdc17	2.91322	0.00087317
C1qc	2.90799	3.91576e-07
LOC100038947	2.90676	2.82625e-06
Ms4a6b	2.89518	2.16631e-05
Siglec1	2.87858	5.41403e-07
Slc26a4	2.87814	0.000166917
Irgm2	2.87545	1.61615e-07
Phf11d	2.87307	3.7399e-06
H2-T23	2.85936	2.17088e-12
Gm5431	2.85266	4.31243e-06
Serpina3i	2.84532	1.86464e-06
Lrrc25	2.81927	8.35486e-05
Apol6	2.80054	4.21887e-06
Cd68	2.79083	1.70914e-08
Ms4a4c	2.78876	0.00735922
Phf11b	2.78409	9.37144e-05
Icos	2.77375	1.38009e-05
Gatm	2.77094	0.000743563
Socs1	2.75806	0.00173464
S100a8	2.73433	0.0142111
Trex1	2.73246	2.40951e-06
Ly6c1	2.73128	1.25766e-07
H2-K1	2.72314	2.54427e-14
Tnfrsf4	2.71439	1.6146e-06
Rbm3	2.71077	8.78892e-08
Lpxn	2.70379	3.16744e-06
Ear3	2.70274	0.000114323
Rtp4	2.6993	7.21524e-08
Slfn2	2.69551	7.10573e-06
Il1b	2.6953	0.0135145
Usp18	2.69302	1.46372e-05
Xdh	2.67519	5.49667e-07
Xaf1	2.66866	7.36011e-08
Ccr1	2.66645	0.000361178
Cd300c2	2.64009	2.8139e-07
Slamf8	2.64002	0.00495935
Olfr56	2.63461	3.71311e-06
Psmb8	2.62908	5.57036e-07
Ddx60	2.61056	2.12034e-06
H2-Q8	2.60719	9.57047e-10
Zbtb16	2.60431	0.00701846
Ctsh	2.6033	5.67469e-07
Clec4e	2.60281	6.79259e-05
Slc15a3	2.60248	2.32005e-05
H2-Q6	2.601	4.50107e-10
Mpeg1	2.59849	1.29747e-07
Rgs1	2.59103	1.29968e-05
Ccl3	2.58877	0.000698524
Lgals3bp	2.57167	9.93442e-09
Gzmk	2.5714	0.0011732
Fcer1g	2.55487	5.42592e-06
Acta1	2.5498	0.0176037
Ccl1	2.54613	1.16547e-05
Apobec1	2.53246	3.25425e-08
Psmb9	2.52916	1.61203e-06
Pirb	2.51825	5.57153e-05
AW112010	2.51018	5.38491e-05
Ifi44	2.51	0.000138234
Sirpb1a	2.50377	2.3919e-05
S100a9	2.50045	0.0247755
H2-Q7	2.49846	1.6146e-06
H2-D1	2.49745	8.89449e-14
H2-Q1	2.49024	2.04389e-11
Rasl10b	2.48798	0.000120682
Gm4070	2.48687	4.66869e-05
Tnfrsf12a	2.48293	1.4249e-06
Fcgr2b	2.48104	0.000102658
Pstpip1	2.47706	1.57705e-05
Rgs16	2.47676	7.13472e-06
S100a14	2.47276	0.000158504
Slfn8	2.4623	0.00021517
Oasl2	2.45679	6.89215e-05
Fst	2.45592	2.75907e-05
Retnla	2.44834	0.000691449
Tnfrsf9	2.44261	2.13638e-05
Fcgr3	2.43864	2.60433e-05
Cxcl13	2.43442	0.00154874
H2-Q5	2.43343	6.84154e-08
Cd180	2.42379	0.000569791
Themis2	2.42216	0.000170232
H2-T22	2.41799	4.50107e-10
Lcp2	2.41151	8.35486e-05
Myrip	2.41	0.0112771
Ido1	2.40417	0.00168483
B2m	2.40403	3.42164e-12
Tnip3	2.40232	4.63978e-06
Gbp7	2.40189	3.10737e-05
Il10	2.39391	1.15715e-05
Fam107a	2.3733	0.0153153
Pim1	2.36635	3.48344e-05
Plac8	2.36414	0.00243065
Sirpb1b	2.36304	1.86182e-05
Cxcl11	2.35558	0.000515285
Cd72	2.35402	0.00103715
Pak6	2.348	1.6381e-05
Stat2	2.33717	9.4085e-06
Lag3	2.33665	5.77391e-05
Igsf6	2.3357	5.547e-05
Tacstd2	2.33532	1.25705e-07
Il18rap	2.33527	1.94614e-05
Tat	2.33232	0.0317536
Trim30a	2.32973	1.83477e-05
Slc11a1	2.32804	0.000121748
Ch25h	2.32507	0.000143112
Casp4	2.31238	5.55117e-05
Clec7a	2.30435	0.000133853
Hmga1-rs1	2.29156	1.91531e-05
Il2rb	2.28964	0.000672021
Parp9	2.2895	1.6146e-06
Rab20	2.28923	6.13879e-06
Trafd1	2.28818	2.2428e-06
Slamf9	2.28543	3.86401e-05
Rnf19b	2.28515	8.87321e-06
Tyrobp	2.28085	4.63978e-06
Samhd1	2.28063	1.52892e-07
Gbp9	2.27799	0.00184678
H2-L	2.26669	7.41075e-09
Tbxas1	2.26501	3.33954e-05
Irf1	2.26402	8.0366e-05
Slc7a5	2.25972	4.50107e-10
Gpr141	2.25655	0.000161387
Cybb	2.25114	2.66394e-05
Spp1	2.24792	0.000425066
H2-T10	2.24508	5.80786e-09
Soat2	2.24161	4.23118e-06
Arl11	2.23891	7.10573e-06
Rgcc	2.23587	0.00115028
Gm15133	2.23289	2.82055e-08
Rasa4	2.2327	3.58874e-07
Ctsw	2.21822	0.0013794
Fkbp1b	2.20812	2.50245e-06
Socs3	2.20336	0.000132965
Psca	2.202	3.92664e-05
Pld4	2.20189	7.55876e-06
Havcr2	2.19105	3.16744e-06
Cirbp	2.19023	7.82255e-05
Ms4a8a	2.18876	2.72353e-07
Adap2	2.18656	0.000533764
Herc6	2.18566	0.00015756
Map3k6	2.18318	0.00905491
Gm15056	2.17529	0.0176387
Sla	2.17432	4.31241e-06
Galnt15	2.16937	0.00727155
Trim30d	2.16705	7.46156e-06
Parp10	2.16306	1.73989e-05
Pik3ip1	2.15853	8.30796e-06
Sh2d1b1	2.14759	6.95661e-07
Lgmn	2.14517	2.71509e-06
Ear12	2.14461	0.000110253
Slc7a8	2.1379	0.000358201
Ptpn22	2.13741	1.8473e-05
Mx2	2.13121	0.000116142
Stat1	2.1289	0.000539648
Csf2rb	2.12875	1.88183e-05
Ccl8	2.12349	0.0184123
Mlkl	2.1215	0.000531393
Cd6	2.11271	0.000172944
Mcemp1	2.10727	5.68068e-07
Slfn3	2.10458	3.7216e-05
Hcls1	2.10441	7.51109e-05
Sp140	2.1018	4.20612e-06
Clec12a	2.09817	0.00368942
Scimp	2.09582	0.00448341
Cd8b1	2.0889	0.0127034
I830077J02Rik	2.08478	0.000516076
Il12rb1	2.08297	0.000261312
Ly6a	2.08107	4.50107e-10
Tlr2	2.07798	5.25921e-05
Ms4a4b	2.07712	0.00316614
Gpr65	2.07541	0.000110537
Mir7115	2.0702	0.00662966
AB124611	2.06876	0.000612342
Myh1	2.06719	0.00631216
Spi1	2.06599	3.33557e-05
Oas2	2.05952	0.000554129
Cd3d	2.05831	0.00461472
Csf2rb2	2.05633	4.25596e-05
Pmvk	2.05366	0.000270065
Fgr	2.05004	0.00138629
Lair1	2.04824	1.18004e-06
Cd84	2.04758	4.09155e-07
H2-M3	2.03963	4.83998e-07
Aim2	2.03881	1.37358e-06
Slc39a2	2.03744	6.91198e-06
Mt1	2.03322	0.00342966
Marco	2.03297	0.00200428
Ube2l6	2.02474	0.000304094
Fermt3	2.02348	9.77974e-06
Bcl2a1b	2.01998	0.000748175
Klhl6	2.01816	1.40098e-05
Tspan4	2.01796	2.10641e-06
Tmem86a	2.01507	4.27895e-06
H2-T-ps	2.01434	2.25293e-08
Hk3	2.01413	0.000777583
B430306N03Rik	2.01317	0.00014094
Mir22hg	2.01031	0.00219772
Cyth4	2.00243	0.000109365
Plin2	2.00142	1.74793e-06
Lgals9	1.99436	2.37093e-05
Ppy	1.99296	0.000821756
Tcf23	1.99036	0.0147299
Sh3bp2	1.98899	1.79905e-05
Aoah	1.98788	0.0027271
Ccl5	1.98635	0.00101007
Casp1	1.98236	0.000437853
Akr1c14	1.97898	0.0119379
Tnfaip8l2	1.97669	0.000154861
Clec4a2	1.97435	2.42782e-06
Ly86	1.96878	0.000140908
Trim21	1.96814	6.85159e-06
Sectm1a	1.96776	0.00136378
Dtx3l	1.96268	0.000102866
Bst2	1.9558	3.79265e-05
Dpep2	1.95384	1.04019e-07
Stfa2l1	1.95245	0.0448773
Il2ra	1.95029	0.000190805
Pyhin1	1.94893	0.0104529
Nkg7	1.94505	0.00569443
Il27	1.94227	0.000394999
Pmaip1	1.94013	0.000875666
Il10ra	1.93505	9.64875e-05
Serpina3h	1.93409	0.000165806
Acp5	1.92039	6.38698e-05
Lgals3	1.92031	1.89162e-06
Cxcr3	1.91865	0.00477473
Mafb	1.91798	0.000560383
Pik3ap1	1.91601	0.0017907
Sh2d2a	1.91183	5.42305e-05
Plek	1.91034	6.89215e-05
Parvg	1.91029	9.77974e-06
Zc3h12a	1.90798	7.09681e-06
Ackr1	1.90764	0.00702532
Lat	1.90455	0.0029467
Tcirg1	1.90048	7.90691e-06
Ncf4	1.8951	0.000911275
Cd52	1.89319	0.00212787
Tgm1	1.88157	3.94e-06
H2-Q2	1.87835	8.72073e-06
Clec4a1	1.87777	0.00385928
Cd5	1.87571	0.00517285
Parp14	1.86957	0.000441685
Rtn4rl2	1.86897	0.000155475
Gramd2	1.86822	2.6598e-05
Cd3e	1.86694	0.00672478
Tnf	1.86528	4.46608e-05
Majin	1.86429	6.14031e-06
Nampt	1.8604	7.55566e-06
Ocstamp	1.85972	0.000249899
Epsti1	1.85633	0.000407979
Tlr9	1.85409	0.0152398
Il4ra	1.85111	0.000161387
Sult1a1	1.84952	0.0124058
Arrdc2	1.84594	0.00493045
Oas1c	1.84583	8.98444e-10
Anxa1	1.84234	5.88456e-05
Atf3	1.84133	0.000350345
Glrx	1.84039	0.000172335
Sh3d21	1.83946	0.00374387
Mir6953	1.83914	0.00579303
Gzmc	1.83738	0.00239118
4833419F23Rik	1.83528	9.3293e-05
Itgb2	1.83216	0.000154341
Snx20	1.83173	0.00155157
Cmpk2	1.83053	0.00453112
Orm2	1.8284	6.46507e-05
Pnpla7	1.82695	1.6146e-06
Fpr2	1.82326	0.00147363
Mapk13	1.81974	1.79541e-05
Tinagl1	1.81849	3.46942e-06
Il20rb	1.8131	0.000244874
Lox	1.81169	0.00491478
Cd3g	1.81047	0.00792861
Mir7005	1.8046	0.00377095
Mir7050	1.80283	0.000634522
Ripk3	1.79883	0.000115048
Rhof	1.7988	2.6598e-05
Sit1	1.79856	0.000304182
Daxx	1.79849	0.000436592
Pycard	1.79696	0.0047352
Il21r	1.79581	0.00757653
Adssl1	1.79221	3.86335e-09
Thbs1	1.78739	0.00305708
Tifa	1.78517	0.000842995
E230013L22Rik	1.78483	4.86293e-06
Clec5a	1.78375	0.000202592
Ly6g	1.78364	0.0122137
Wars	1.7836	0.000121981
Map3k8	1.78236	0.00123557
Cd300a	1.78191	7.75613e-05
Cdca3	1.78076	0.000176392
Parp12	1.77974	9.56671e-05
Ada	1.7783	0.00677559
Tnfaip2	1.77726	6.76559e-05
Hcst	1.77467	0.000480469
Slc2a6	1.77103	0.000184991
Gpr157	1.7681	0.000220797
Cd164l2	1.76695	4.63051e-07
Csf3r	1.76605	0.00355125
Ctse	1.76154	9.40371e-05
Trem3	1.75858	0.0107562
Chaf1b	1.75725	6.13879e-06
Snx10	1.75626	7.82255e-05
Gda	1.7561	1.98823e-05
Clec4a3	1.75534	0.000160045
Ptafr	1.75277	0.00587932
Irf8	1.7523	0.000518105
Cd53	1.75215	0.000261312
Nfkbie	1.75142	3.21826e-05
Cotl1	1.74928	6.694e-05
Mir5121	1.74803	0.0002184
Fxyd5	1.74707	3.7139e-06
Sin3b	1.74538	2.30196e-06
Tnfrsf1b	1.74453	0.000442965
Il1rn	1.74417	0.0187243
Cd8a	1.74214	0.0107847
Slc6a14	1.74192	0.000396146
Slc16a6	1.74112	1.6526e-06
Lacc1	1.73803	0.0015211
Mir3101	1.73681	0.0110809
Irf5	1.73579	0.00144869
Tbc1d2	1.73537	3.9767e-06
Hsd11b2	1.73535	0.000519954
Was	1.73072	0.000240697
Gm5150	1.72977	0.0010507
Snhg3	1.72634	0.000724672
Sema7a	1.72588	0.00293179
Klra2	1.72504	0.000466312
Insl6	1.7203	0.00131731
Hck	1.71801	0.000192942
Grrp1	1.71457	0.000918116
Mir27a	1.71367	0.0114015
Lat2	1.71318	0.000182548
Vav1	1.71269	0.000652431
Nuak2	1.71175	5.66443e-07
Runx3	1.71003	0.000670781
Dok3	1.70886	0.000119585
Slamf7	1.70878	0.00562486
Pydc4	1.70825	0.00240264
Mir7014	1.70466	0.0050205
Pfkfb3	1.70449	1.55602e-05
Lrrc29	1.70212	2.06443e-05
C2	1.70105	0.000185522
Tmem213	1.69821	0.00986506
Trem1	1.69809	0.00229612
Snora21	1.69446	0.00249942
F7	1.68936	0.000184991
Coro1a	1.68798	0.00138629
Cdkn1a	1.68647	0.0134342
Dnase2a	1.68561	1.25766e-07
Gm6904	1.68394	4.49619e-05
Ptgs1	1.68298	5.74938e-06
Pira2	1.68	0.000609915
Snord16a	1.67937	0.00989608
Fgl2	1.67848	0.002989
H2-DMb1	1.67398	0.00129255
Clec4d	1.67124	0.00449669
5430437J10Rik	1.66997	0.000101934
Gins2	1.66935	0.00121644
2810417H13Rik	1.6681	0.0012659
Batf3	1.66726	0.0130617
2410006H16Rik	1.66262	3.32433e-05
Alox5ap	1.66071	8.56121e-05
Pnpla2	1.66062	0.000625623
E030003E18Rik	1.65955	0.0274656
Gm12185	1.65812	0.00413009
Rnf149	1.65771	7.11567e-05
Psmb10	1.65538	0.00330225
Selplg	1.65475	0.000476632
Ifih1	1.65348	0.000345174
Ddit4	1.65318	0.0441579
Ppa1	1.65167	0.00103162
Cd33	1.65053	5.90048e-05
Mettl21e	1.64958	0.0100962
Ugt1a7c	1.64851	0.000142524
Cd48	1.6485	0.000964053
Myh8	1.64707	0.0313755
Arrb2	1.64438	2.34457e-05
Ifi27l2b	1.64201	0.000429507
Hpgds	1.64081	4.63051e-07
2200002D01Rik	1.6395	0.000295546
Klhdc8a	1.63657	8.33565e-05
Hspa1a	1.63535	0.0445956
Cyba	1.63533	0.000161387
Ifit1bl1	1.63425	0.0176688
Arhgap30	1.63303	0.000833115
Mylpf	1.63115	0.0373922
H2-Q10	1.62971	0.00350351
Ccne1	1.62891	0.0003377
Clec4n	1.62841	0.00117262
Prmt8	1.6189	0.00625122
Cdt1	1.61503	2.45745e-05
Btnl6	1.61026	0.000223326
Slc37a2	1.60362	0.000488391
Malt1	1.60214	0.000330019
Trim29	1.60122	0.00207013
Prss22	1.59998	0.00280919
Lst1	1.59989	0.0134548
Gm21188	1.59894	0.0103406
Ctsd	1.59753	2.23693e-05
Snhg5	1.59658	0.000124933
Grina	1.59622	1.86464e-06
Nhlrc3	1.59595	9.36914e-06
Scel	1.59558	0.0116929
Sema4d	1.59274	0.0020165
Cd276	1.59269	0.000144718
Fas	1.59143	0.00387823
Wfdc21	1.58873	0.010529
Arhgap9	1.58425	0.000166917
Itgam	1.58185	0.00374108
Ccr8	1.57999	0.00208272
Mir5132	1.57905	0.00118166
Glipr2	1.57881	0.000271431
Tk1	1.57843	0.00119304
Tnfrsf18	1.57669	0.00263165
Evi2a	1.57361	0.00231038
Snord33	1.57337	0.00300256
Krt7	1.57276	1.55602e-05
Nckap1l	1.572	0.00061593
Smpdl3b	1.56739	0.00281807
Cxcl1	1.56714	0.00504513
Relt	1.56561	3.104e-05
H2-Aa	1.56463	0.00295557
Mir3061	1.56379	0.0229393
Parp3	1.56266	2.57527e-08
Gla	1.55992	5.71735e-05
Fyb	1.55956	0.00220827
Car13	1.55302	0.000853976
Abhd15	1.54988	4.40234e-05
Psme2	1.54813	0.00195786
Ceacam16	1.548	9.75507e-05
Tlr7	1.54622	1.61615e-07
Clmp	1.54361	0.000701371
Cdkn3	1.54271	0.00413009
Cd86	1.5427	0.00402945
Milr1	1.54247	4.01838e-05
Zmynd15	1.54162	1.62778e-05
1810062G17Rik	1.54144	7.62646e-05
Tlr6	1.53938	7.01618e-05
Mical1	1.53843	9.53195e-07
AI662270	1.53745	0.00299263
Sesn2	1.5366	0.000149466
Ctsz	1.53638	1.91291e-05
Naip2	1.53588	0.000175553
Sphk1	1.53543	0.00669292
Snhg15	1.53374	1.32099e-05
Pik3r5	1.53067	0.00202109
Saa1	1.53031	0.00636608
Bcl2a1d	1.52921	0.00934683
Ereg	1.5276	0.000602059
Pnp2	1.5273	0.00206608
Tmem106a	1.52644	0.0041591
Ssh1	1.52643	0.000389391
Gjb4	1.52285	0.000141121
Atp6v0a4	1.52137	5.00934e-05
Hif3a	1.52115	0.00214838
Psat1	1.51982	0.000101321
Lck	1.51969	0.0114652
Zfas1	1.51824	1.6146e-06
Snord69	1.51803	0.0401653
F10	1.51795	0.0126819
Ccnb1	1.51672	0.00163752
E030018B13Rik	1.5166	0.0004199
Dusp2	1.51639	0.014354
Cxcl16	1.51145	0.000109695
Laptm5	1.51098	2.91278e-05
Misp	1.50921	0.00264215
Apol10b	1.50851	0.0204781
Cxcr2	1.50792	0.026411
Gna15	1.50751	0.000142489
Mylip	1.50665	0.0126462
Gm17757	1.50397	0.00300894
Atp6v0d2	1.5031	0.00278486
Ndnf	1.50221	0.00860077
Ptpn7	1.50025	0.00200458
Eif2ak2	1.50007	0.00228039
Ptn	-1.50361	0.00383486
Proser3	-1.50422	6.73682e-05
Edn1	-1.50638	0.00159386
Plcb1	-1.5072	5.34481e-08
Zg16	-1.5082	0.0171311
Sod3	-1.51317	1.28188e-05
Chst7	-1.51545	2.86824e-06
Ces2e	-1.51599	5.38491e-05
Cela3b	-1.51901	0.0266749
Morn5	-1.51938	0.00817266
Cfap45	-1.52046	0.000767874
Mapt	-1.52147	0.000278628
Cckar	-1.52324	0.000405968
A330009N23Rik	-1.52424	0.000115446
Rian	-1.52715	0.0127148
Foxa1	-1.5282	0.000390315
Ccl22	-1.53078	0.00341719
Hist2h3c2	-1.53166	6.84154e-08
Fmod	-1.53502	4.97773e-05
Tmem158	-1.53869	0.000110537
Il33	-1.5399	0.00562142
Tcte1	-1.54145	0.0023127
2610203C22Rik	-1.54588	2.91278e-05
Map3k19	-1.54909	0.000158096
5330417C22Rik	-1.55039	0.000385783
Myl9	-1.55142	0.000120039
Nek11	-1.55154	0.000175262
Mtss1l	-1.55379	2.22535e-05
Synm	-1.55748	8.17847e-06
Dlec1	-1.56028	0.000128515
Dnaja4	-1.56113	7.10758e-06
Dnaic2	-1.56276	0.0012659
Phyhip	-1.56292	0.0292284
Ccdc113	-1.56364	0.00206608
Ripply3	-1.56559	0.00144154
Cd209f	-1.56565	0.000732594
Ptgfr	-1.56648	5.66443e-07
Pcolce2	-1.56672	0.0026318
Cyp2a4	-1.56693	0.00898913
Igsf10	-1.56786	2.16064e-06
Fam166b	-1.57107	0.000185143
Col14a1	-1.57172	5.55404e-05
Cldn15	-1.57367	0.0113857
Dnah9	-1.5757	1.91531e-05
Pdia5	-1.58013	2.89681e-05
Rprml	-1.58289	0.00167028
Fam161a	-1.5864	0.00120744
Ugt1a6b	-1.58887	0.000497702
Calcrl	-1.58922	0.00706028
Spns2	-1.58928	6.78419e-06
Cfap57	-1.58995	0.000756885
Ccdc153	-1.59384	0.00261578
Fam161b	-1.59766	0.000113845
Scn7a	-1.59788	0.00070006
Csdc2	-1.59801	0.00152906
Amy2a5	-1.60006	0.0275278
2410004P03Rik	-1.60019	0.00141855
Scgb1a1	-1.60177	0.015111
Myh7	-1.60439	0.000138804
Mrps6	-1.6047	6.0814e-05
1700003E16Rik	-1.60789	0.000733531
Chordc1	-1.61429	2.86777e-05
Itih4	-1.61612	0.00179375
Cfap58	-1.61756	0.000131675
Ankrd63	-1.61795	0.00182494
Gpx2	-1.62057	0.00172035
Acta2	-1.62529	0.000432363
Mrgprf	-1.62579	1.38009e-05
Eno4	-1.6289	0.000659985
Pnmal2	-1.6302	0.00299263
Sost	-1.63156	3.64479e-05
Impdh1	-1.63403	1.23195e-05
Lrrc46	-1.635	0.00311347
Cyp4f15	-1.63616	8.35486e-05
Cpa1	-1.63962	0.0168021
1700016K19Rik	-1.64283	0.00094451
Cd207	-1.6435	1.9123e-06
Rgs9	-1.64533	2.40951e-06
Dydc2	-1.6454	0.00180339
Cd93	-1.64601	0.000139613
Mycbpap	-1.64678	8.63031e-05
Arhgdig	-1.64689	0.00125731
Kank4	-1.64994	0.000624014
Kit	-1.65503	7.89416e-05
Ttc21a	-1.65641	0.000717684
Cend1	-1.65785	0.0476559
Dnaaf1	-1.66029	0.000602059
Cetn4	-1.66275	0.00337633
Iqcg	-1.66286	0.000181535
1110017D15Rik	-1.66414	0.000401584
Prdm8	-1.66462	1.25705e-07
Calml4	-1.66821	0.000630579
Iyd	-1.67563	0.000815844
Ugt1a6a	-1.68123	8.47141e-05
Aldh1a7	-1.68303	7.10533e-05
Ift80	-1.68553	9.2229e-07
Wnt10b	-1.69589	9.52376e-05
Ccdc180	-1.69601	9.78064e-05
2610507I01Rik	-1.69645	6.25718e-05
Ccdc146	-1.70113	0.000353364
Capsl	-1.70516	0.000686239
Ushbp1	-1.70854	0.00437209
Ltbp4	-1.71176	0.00059584
Tspan13	-1.71272	2.84081e-06
Mtfp1	-1.71439	9.56445e-05
Prss2	-1.71567	0.0240897
Fam181b	-1.7202	9.89654e-07
Cat	-1.72075	0.000169294
C130080G10Rik	-1.72131	0.000297006
Zmynd10	-1.72411	0.000645976
Rbp4	-1.73307	0.000132871
Mgat3	-1.73731	0.000235614
Rnf186	-1.7378	4.03543e-05
1700040L02Rik	-1.73832	0.000158096
Cap2	-1.74175	1.37731e-05
Mir6935	-1.74231	0.000917805
Meox1	-1.74264	3.99358e-06
4932443I19Rik	-1.74627	0.0004571
Pcyox1l	-1.74678	1.6526e-06
4833427G06Rik	-1.74718	0.000434047
Hspa4l	-1.74795	3.71592e-07
Grem2	-1.75017	8.31944e-06
Rsph1	-1.75098	0.000951753
1700007G11Rik	-1.75154	0.00116371
Nov	-1.75241	0.000199893
Col15a1	-1.75386	0.000109195
Tst	-1.75504	1.57573e-05
Wscd1	-1.75776	0.000407979
Kcnj13	-1.7587	3.84899e-06
Lrrc34	-1.76128	0.000156206
Lhb	-1.76187	0.000602277
1810011O10Rik	-1.76838	9.1986e-06
Sox2	-1.77049	0.000422988
Pgam2	-1.77271	0.0466762
Mlf1	-1.77349	0.00087846
Gkn3	-1.7738	0.000953204
Pln	-1.77405	0.00766784
Erich2	-1.77598	0.000752729
Prr18	-1.77829	4.54587e-06
Dleu2	-1.77915	2.12034e-06
Aoc3	-1.78446	0.000161387
Aplp1	-1.78588	0.0347542
Nat8f3	-1.78741	7.81985e-07
1700013F07Rik	-1.78911	0.000273933
Igip	-1.79502	7.53449e-05
Gstm6	-1.79638	0.000133693
Ppp2r2c	-1.7967	0.00116371
Mybpc3	-1.79981	0.00861374
Hey1	-1.79983	0.000355381
1700001C02Rik	-1.80114	0.00214489
Mdh1b	-1.80196	0.00038194
Ankrd66	-1.80362	0.00025462
Ccpg1os	-1.81117	0.000131069
Xlr3a	-1.8158	1.83514e-05
Sox7	-1.81817	7.92581e-05
Lrrn4	-1.81854	0.0145856
Faim2	-1.81997	0.000212769
Fam216b	-1.82523	0.000500241
Serpinh1	-1.82527	4.66664e-05
Rnase1	-1.82674	0.00345903
Aldh1a1	-1.83041	0.000488049
1600029I14Rik	-1.83067	0.000879179
Gm973	-1.83558	0.000183389
Acoxl	-1.85314	0.00148343
Dll4	-1.8594	0.000665599
Ak7	-1.86036	0.000140233
Sh3bgr	-1.86063	8.35824e-06
Dnah5	-1.86089	1.43096e-05
Upk2	-1.87075	0.0004102
Maats1	-1.87786	4.50333e-05
Npr3	-1.87802	0.00908732
Ccdc65	-1.89211	7.23763e-05
Pnlip	-1.89233	0.00779445
Tbxa2r	-1.89271	6.13879e-06
Rnf144a	-1.89642	9.33683e-07
Spag6l	-1.91287	6.06871e-05
Bex2	-1.91351	0.00802197
Cyp2s1	-1.91437	2.14589e-05
Riiad1	-1.91675	0.000752594
Fkbp4	-1.91934	2.46818e-09
Aldh1a2	-1.92119	0.00379564
Pon1	-1.92421	0.0253463
Mns1	-1.92462	0.000587259
Clec11a	-1.92648	1.25466e-05
Dnah6	-1.92752	3.04459e-05
Rtp3	-1.92762	0.000148474
Try4	-1.92939	0.00833106
Cfap157	-1.93127	4.4628e-05
Hepacam2	-1.93836	4.50107e-10
Wif1	-1.94504	1.03731e-06
Kctd21	-1.94704	0.000762933
Pnliprp1	-1.94713	0.00385383
Wdr63	-1.94976	6.25718e-05
Lgals2	-1.95222	0.00973895
Hrc	-1.95426	0.0134236
Vpreb3	-1.95658	0.00174465
Ttc29	-1.96137	5.78032e-05
Gsta2	-1.96265	0.00379398
Cfap161	-1.97939	0.000393677
Cdhr3	-1.98591	0.00064039
Nat8f7	-1.99046	3.86642e-09
Aard	-1.99503	9.94434e-06
Retn	-2.00191	0.0276685
Ctxn1	-2.00393	0.000492489
Diras2	-2.00393	6.0908e-06
Lrat	-2.00503	0.000930393
Ccdc129	-2.01077	0.000302134
Thbd	-2.01964	7.53449e-05
S100b	-2.02022	0.00158218
Sntn	-2.02096	0.000780985
Mall	-2.02148	0.000346751
Asb2	-2.02598	2.6598e-05
Oit1	-2.02641	0.0378053
Asgr1	-2.02662	4.01838e-05
C2cd4b	-2.0276	1.56342e-05
Tagln3	-2.0355	0.022694
Iqca	-2.03783	2.54708e-05
Npw	-2.03888	3.82579e-06
Syt5	-2.04225	7.48091e-05
Aldh3a1	-2.04838	0.0237777
Gap43	-2.04899	0.00012505
Stmn2	-2.05152	0.00123838
Scn3b	-2.05175	0.000157946
Rsph4a	-2.05687	8.80532e-05
Slc4a5	-2.06001	3.34684e-06
Fabp3	-2.06852	0.014456
Adh7	-2.06882	0.01999
Cldn22	-2.08624	0.0147238
Actg2	-2.09384	0.000510007
Dnaic1	-2.09485	1.15867e-05
Tril	-2.09988	6.56898e-07
Slc17a7	-2.10345	0.0439518
Ldlrad1	-2.10372	0.000113603
Fam183b	-2.10375	0.000262364
Slc7a10	-2.10717	0.000416999
Akap14	-2.11364	2.03565e-05
Nme9	-2.12273	0.000128245
Upk3b	-2.1258	0.00646339
Disp2	-2.13991	7.73191e-05
Rtkn2	-2.14558	0.00483496
Olfml2a	-2.15169	3.71311e-06
Dhrs7c	-2.15253	0.00310938
Clec3b	-2.1569	1.17629e-05
Spef1	-2.15896	1.70914e-08
1700024G13Rik	-2.15967	0.00333082
Scgb1c1	-2.16372	0.00125486
Cnn1	-2.17744	0.00213567
Dnali1	-2.18248	5.73047e-05
Sfrp2	-2.18374	0.000192768
Serf1	-2.18777	1.6146e-06
Fcrls	-2.18884	2.19526e-06
Rab6b	-2.19283	1.15566e-05
Ppbp	-2.20908	0.000420879
Serpina9	-2.2092	0.00138629
Gstm1	-2.21128	0.000306921
Drc1	-2.21753	1.64878e-05
Gja5	-2.21772	0.000132965
Rasgrp3	-2.22034	2.3448e-05
Gabrp	-2.22284	4.59858e-05
Fam92b	-2.23117	9.78064e-05
Fam101a	-2.24234	3.59341e-06
Stmnd1	-2.24666	0.00010125
Scgb3a2	-2.25322	0.0029467
Wdr78	-2.26073	7.55876e-06
Cfap52	-2.26917	9.01207e-06
Ctrb1	-2.2713	0.0130212
Cela2a	-2.27317	0.00449165
Morn3	-2.28307	9.18443e-06
Actn2	-2.29036	0.0187073
Fndc5	-2.29114	4.59858e-05
Bpifa2	-2.30129	1.3187e-07
Hpcal4	-2.30499	0.000641674
Tppp3	-2.3668	8.78892e-08
Ces1e	-2.38781	2.43758e-05
Chad	-2.40601	0.00458969
Cfap77	-2.44482	3.82579e-06
Cyp4a12b	-2.47059	0.00293022
Cox8b	-2.48299	0.0154937
Eef1a2	-2.5087	0.0288236
Spon2	-2.53497	9.64567e-05
Olfm2	-2.53667	2.53242e-05
Mgl2	-2.56111	1.8649e-07
Adipoq	-2.58055	0.0198415
Pcp4l1	-2.6039	5.42305e-05
Nptx1	-2.61777	5.01062e-08
Pcdh12	-2.62098	1.86547e-06
Ces1g	-2.62806	1.67679e-05
Myoz2	-2.63322	0.0247064
Cyp2f2	-2.65689	0.000479593
Csrp3	-2.67204	0.0164394
Atp6v1b1	-2.6804	2.34632e-05
Acsm1	-2.71463	5.35495e-06
1700007K13Rik	-2.72885	9.2229e-07
Ackr4	-2.74364	8.25128e-09
Hsph1	-2.74468	2.49012e-09
Tnnt2	-2.74597	0.00293213
Tnnc1	-2.77449	0.00304104
Hc	-2.92896	0.000143112
Aplnr	-2.9856	3.44951e-05
Lypd2	-3.0256	0.000142504
Tubb4a	-3.03279	0.000129837
Wfdc1	-3.04774	9.57047e-10
Mb	-3.08383	0.0197417
Tnni3	-3.15897	0.014354
Scgb3a1	-3.20667	0.0462337
Ckmt2	-3.22695	0.00240748
Colq	-3.23598	3.87059e-06
Sln	-3.24911	0.0372628
B430010I23Rik	-3.25223	3.72812e-06
Casq2	-3.25574	4.51544e-05
Fabp1	-3.27386	1.6874e-06
Rbp7	-3.3226	3.82579e-06
Actc1	-3.34444	0.000387565
Hamp	-3.35789	0.00594657
Cox7a1	-3.42523	0.000242094
Cd209a	-3.44978	3.68583e-09
Cfd	-3.49021	0.0209998
Tff2	-3.5528	0.0271635
Ces1f	-3.59848	7.25915e-06
Cyp2a5	-3.69364	0.00854989
Car3	-3.6985	0.024367
Myh6	-3.98804	0.000780677
Mybphl	-4.01972	5.46751e-05
Cyp1a1	-4.02233	2.32314e-07
Apln	-4.18527	1.25766e-07
Myl4	-4.61195	0.000237092
Myl7	-5.23209	0.000576586

## Sheet: STable3. Alpha 3dpi
GeneID	Log2 Fold Change	FDR Value
Cxcl10	8.11817	6.61202e-09
Saa3	7.0997	3.33487e-08
Rsad2	6.79471	1.96376e-10
Ccl2	6.64177	2.74615e-07
Irf7	6.6316	9.47597e-16
Cxcl9	5.92999	6.9108e-08
Sprr1a	5.83054	6.16147e-09
Ccl7	5.8027	3.29486e-05
Ifi204	5.79375	1.88008e-08
Isg15	5.62729	5.14271e-09
Ms4a4c	5.55829	3.09184e-06
Zbp1	5.53388	1.27904e-09
Ly6i	5.51968	2.0288e-09
Fcgr1	5.3421	6.09457e-08
Ifi205	5.25173	2.25482e-07
Oasl1	5.2457	1.96427e-07
Mx1	5.23381	2.98888e-09
Mnda	5.23175	8.59084e-08
Oas3	5.15027	8.42598e-11
Ly6c2	5.09639	8.42598e-11
Acod1	5.04804	9.48954e-09
Timp1	4.99288	2.25482e-07
AA467197	4.88246	5.11367e-06
Apod	4.86982	9.31591e-09
Gm12250	4.86131	2.84346e-07
Apol9a	4.83051	1.37895e-11
Oas1g	4.80544	2.9235e-09
Ccl4	4.75978	1.85111e-06
Ms4a6d	4.74617	1.00083e-08
Oas1a	4.6828	2.34736e-08
Il18bp	4.66006	1.82186e-09
Ifit3	4.60472	9.61724e-12
Ifit3b	4.59118	8.42598e-11
Cfb	4.58582	1.83867e-09
Serpina3m	4.5551	1.96427e-07
Slfn1	4.5513	2.30772e-07
Ms4a6c	4.5427	5.79561e-10
Fam26f	4.54137	5.26478e-06
Ifit1	4.50843	8.42598e-11
Ifit1bl1	4.50215	1.88407e-08
Phf11a	4.49265	7.41454e-08
Tgtp1	4.48576	5.68813e-08
Cxcl13	4.46808	2.94783e-07
Xcl1	4.44741	6.41661e-06
C3ar1	4.413	9.45748e-08
Apol9b	4.34426	4.7757e-11
Ms4a6b	4.28832	2.54224e-08
Fcgr4	4.2862	2.24486e-07
Retnla	4.27572	3.33409e-07
Dhx58	4.24125	1.88407e-08
Phf11b	4.22625	1.49169e-07
Ifit2	4.22331	6.11664e-07
H2-Q9	4.1904	1.04693e-06
Efcab3	4.1639	5.92538e-11
Cd274	4.15789	6.485e-08
Ifi27l2a	4.12237	4.61401e-09
Ubd	4.09619	1.37569e-05
Gzmb	4.09495	8.17797e-05
Ccr5	4.07475	1.15661e-05
Iigp1	4.0252	2.83541e-07
Slfn4	3.97922	5.94822e-05
Irgm1	3.97864	1.61257e-08
Igtp	3.96448	8.61222e-08
Lilrb4a	3.92688	1.89366e-08
Gbp5	3.908	4.6674e-06
Serpina3g	3.89897	3.95526e-06
Plac8	3.89285	7.19577e-06
Orm1	3.8915	8.54002e-09
Fosl1	3.89079	1.51479e-10
LOC100038947	3.86035	1.24539e-08
Usp18	3.85414	2.95896e-08
Ccl12	3.84043	0.000683561
Ifi44	3.8402	1.96427e-07
Sirpb1a	3.83369	8.54002e-09
Serpina3f	3.83102	2.65987e-05
Phf11d	3.81946	1.92921e-08
Ifnl2	3.79376	5.79561e-10
Tgtp2	3.79056	4.79284e-07
Tlr9	3.78102	3.23622e-06
Pla1a	3.77545	1.10843e-08
Gbp10	3.71253	6.03108e-06
Trex1	3.68537	8.54002e-09
Msr1	3.68519	6.14976e-08
Oasl2	3.68506	1.08927e-07
Lilr4b	3.66625	6.09457e-08
Cyp4f18	3.65002	4.41828e-10
AI607873	3.64039	2.48593e-08
Cmpk2	3.59881	1.10978e-06
Gbp2	3.56528	4.6862e-05
Mx2	3.54833	1.33301e-08
Saa1	3.54691	4.50026e-08
Ch25h	3.54281	2.25482e-07
Tgfbi	3.53723	5.58348e-07
Gbp6	3.53319	6.35798e-06
Gm5431	3.53296	6.40167e-08
Il1rn	3.52179	6.66062e-06
Ptafr	3.51935	5.23543e-07
BC147527	3.50654	2.19607e-05
Sectm1a	3.50587	2.6377e-07
Ifi47	3.50133	3.57932e-06
Lrrc25	3.50085	3.24586e-06
Sirpb1b	3.47515	1.49294e-08
Siglec1	3.47461	8.54002e-09
Cxcl11	3.46315	1.54501e-06
Gm15056	3.45269	0.00020445
Lgals3bp	3.44737	1.33741e-11
H2-T9	3.4419	1.06473e-12
Cd180	3.42596	4.87501e-06
Gpnmb	3.40662	4.34756e-06
Gbp3	3.35871	1.16411e-06
Slfn8	3.34582	1.71342e-06
Slamf9	3.33566	7.30846e-08
Aif1	3.33036	2.58766e-05
Pyhin1	3.32583	4.01145e-05
Tlr13	3.32359	6.61202e-09
Ccr1	3.32317	1.96258e-05
Socs1	3.32266	0.000205247
Arg1	3.31187	0.00126074
Gm4951	3.31008	3.64463e-07
Ifnl3	3.30915	8.42598e-11
Ctss	3.28442	8.54002e-09
Ms4a7	3.26791	2.3576e-06
Lcn2	3.26597	8.17519e-08
Herc6	3.26245	2.91366e-07
Tap1	3.25635	8.55551e-09
Cd72	3.23602	1.53962e-05
Themis2	3.23504	2.62695e-06
Lpxn	3.23321	9.45748e-08
Mmp8	3.22995	3.10794e-05
Wfdc17	3.21952	0.00030548
B430306N03Rik	3.21485	3.9223e-08
Rtp4	3.20988	1.69122e-09
Selp	3.20923	2.87428e-06
Scimp	3.20446	3.96033e-05
Gpr141	3.19666	5.15398e-07
Slfn2	3.18744	3.67527e-07
Slc15a3	3.18675	8.23377e-07
H2-T23	3.1702	1.92554e-13
Clec4e	3.16596	2.55421e-06
H2-T22	3.15656	5.11919e-13
Serpina3n	3.15577	1.18581e-07
Il6	3.14715	1.30875e-06
Rgs16	3.14387	6.09457e-08
Trim30a	3.13686	1.11373e-07
Ear6	3.13497	5.69857e-05
Ccl3	3.12499	6.71742e-05
Gm6904	3.11671	3.39996e-10
H2-Q6	3.09426	6.05647e-12
Gm21188	3.08155	3.75898e-06
Clec7a	3.06634	1.65468e-06
Orm2	3.05466	6.61202e-09
H2-Q8	3.04557	1.72243e-11
Batf2	3.03568	4.55668e-05
Slc26a4	3.02081	8.50483e-05
Fcer1g	3.01546	2.85958e-07
Mpeg1	3.00845	6.33103e-09
Tarm1	3.0002	9.84629e-05
Xaf1	2.99916	5.56836e-09
Hspa1a	2.9883	0.000343166
Ddx60	2.98345	1.20196e-07
Ackr1	2.98216	4.81661e-05
Lst1	2.97141	2.47953e-05
Cd68	2.97105	3.76929e-09
Lag3	2.96484	1.01597e-06
Gm11127	2.95575	8.64259e-06
Mlkl	2.93514	5.56041e-06
Cd300lf	2.91866	3.64641e-07
H2-Q7	2.91113	8.20728e-08
Epsti1	2.90669	4.26325e-07
Slamf8	2.89324	0.0021779
Apoc2	2.8932	2.92126e-05
Socs3	2.8862	2.81587e-06
Clec4a3	2.8856	3.48742e-08
Psmb8	2.87855	7.80425e-08
Slamf7	2.87747	9.97162e-06
Pla2g7	2.86439	1.20246e-05
Mir7008	2.84848	4.09909e-08
Irgm2	2.84782	1.4195e-07
Slc11a1	2.83894	6.4819e-06
Plau	2.82859	1.51111e-05
Ocstamp	2.82391	3.64641e-07
H2-Q5	2.81065	2.89256e-09
Cybb	2.80311	6.9594e-07
G530011O06Rik	2.80225	1.81358e-05
Ccl5	2.79269	1.55947e-05
Slc28a2	2.78376	0.000111757
Ube2l6	2.78277	3.95526e-06
Pld4	2.78012	1.18581e-07
Ifnb1	2.77897	8.16502e-07
Lgals9	2.76926	8.94901e-08
Clec12a	2.76739	0.000215689
Ccl1	2.76527	2.44621e-06
Ms4a4b	2.76462	0.000163739
Trim30d	2.76344	6.485e-08
Cldn4	2.76158	9.07641e-05
I830077J02Rik	2.7568	9.94838e-06
Stat1	2.75302	2.08459e-05
Trem2	2.74233	0.000312463
Pira2	2.73364	3.33121e-07
Fkbp5	2.73204	0.00108946
Ido1	2.72864	0.000405824
C1qb	2.70193	7.94136e-07
Gzma	2.70021	9.99124e-05
Rbm3	2.68842	6.9647e-08
Pydc4	2.67584	7.37183e-06
Il2rb	2.67541	0.000103277
Bst2	2.67132	2.46902e-07
Sectm1b	2.66648	1.5842e-05
Gm4841	2.66477	7.05017e-05
Pirb	2.66427	2.35963e-05
Ifitm6	2.66336	0.0189247
Atf3	2.64102	2.25619e-06
Tnfrsf12a	2.63003	3.82113e-07
Gm5150	2.621	3.08186e-06
Ms4a4a	2.61496	9.41112e-07
Ear3	2.61076	0.000173688
Sp140	2.60849	7.65185e-08
Slc39a2	2.6056	5.43508e-08
H2-K1	2.60526	5.5497e-14
Slc7a8	2.60445	2.29333e-05
Cd300c2	2.6043	2.74239e-07
Phf11c	2.60324	0.0194173
Gpr31b	2.60175	4.98079e-06
Cd300a	2.59662	1.08456e-07
Cd53	2.59345	8.43899e-07
H2-Q4	2.59243	1.34601e-12
Arl11	2.58648	4.34795e-07
Ncf4	2.57537	2.00641e-05
Tyrobp	2.56888	5.26482e-07
2010005H15Rik	2.55699	2.96084e-06
Fgr	2.55674	0.00010987
Gm12185	2.55318	2.4352e-05
Car13	2.55102	5.00676e-07
Lcp2	2.55074	3.59801e-05
Oas2	2.54011	3.4773e-05
Gatm	2.53908	0.00185358
Clec4a1	2.5349	0.000160799
Aoah	2.52562	0.000195896
Tlr2	2.52005	2.55421e-06
Irf5	2.51625	1.2464e-05
Sh2d1b1	2.51354	2.24797e-08
Snx20	2.50636	3.51524e-05
Stat2	2.5036	2.77877e-06
Pik3ap1	2.49657	9.12085e-05
Gm5424	2.49415	0.000159081
Pycard	2.48047	0.000180686
Casp4	2.47919	1.91395e-05
Hspa1b	2.47591	0.00190054
Daxx	2.47495	5.40143e-06
Klra2	2.47211	2.29203e-06
Gzmc	2.46965	9.80068e-05
Tnip3	2.4683	2.39237e-06
Il1r2	2.45649	0.0239054
Clec4n	2.45629	4.15781e-06
Psmb9	2.45498	2.03545e-06
Ifi27l2b	2.45366	1.37407e-06
Olfr56	2.45232	9.45415e-06
Sele	2.45096	2.25619e-06
Ifih1	2.44424	8.76811e-07
Ifitm3	2.43734	3.00533e-07
B2m	2.43593	2.09719e-12
Spi1	2.43503	2.5385e-06
Hcls1	2.43193	9.04106e-06
Serpine1	2.42711	5.27018e-08
Evi2a	2.426	9.45415e-06
Hmga1-rs1	2.4227	7.03097e-06
Bcl2a1b	2.42084	9.51115e-05
Prss22	2.40999	2.25346e-05
Runx3	2.40571	5.44408e-06
Gm21975	2.40204	0.0212512
Serpina3i	2.39711	2.54815e-05
Nt5c3	2.39702	6.6192e-07
Dtx3l	2.39594	5.16953e-06
Oas1b	2.39559	4.07548e-06
Tmem106a	2.39502	2.74657e-05
Igsf6	2.38841	3.65963e-05
Hsd11b2	2.3798	5.75989e-06
Mafb	2.37929	3.43119e-05
Nlrc5	2.37553	0.000242505
Tnf	2.37439	7.95399e-07
Gjb4	2.36495	1.11373e-07
Lgals3	2.36484	3.3405e-08
H2-T10	2.35913	1.38417e-09
Parp12	2.35631	1.40551e-06
Gpr84	2.34827	0.000137942
Prf1	2.34802	0.00108049
F10	2.34663	0.000164092
Havcr2	2.34489	6.80969e-07
Hpx	2.33322	2.09419e-07
Slfn9	2.33168	5.0284e-05
Hsh2d	2.33129	4.92205e-06
H2-D1	2.3278	5.71609e-13
Thbs1	2.32687	0.000205948
Ly86	2.3264	1.40501e-05
Pim1	2.32621	4.05377e-05
Ivl	2.32619	0.00651747
Tigit	2.31827	0.000156798
Apobec1	2.31189	1.37477e-07
H2-Q1	2.3083	8.42598e-11
AW112010	2.29926	0.000153692
Cd52	2.29574	0.000301358
Il1b	2.29353	0.0378945
Nkg7	2.29165	0.00142614
Plekho2	2.29058	7.38905e-06
Cd300e	2.28912	2.23297e-06
Naip2	2.2861	2.84346e-07
BC094916	2.28145	6.40597e-05
Hk3	2.28144	0.000174805
Klrk1	2.27669	1.21571e-05
Stfa1	2.27433	0.000173505
Lat2	2.26841	2.62496e-06
Plek	2.26515	5.26684e-06
Cd200r4	2.26497	6.77211e-07
Ctsw	2.25657	0.00117031
Tnfaip8l2	2.25257	2.58766e-05
Myc	2.25058	4.90356e-09
Lacc1	2.24761	6.86755e-05
C1qa	2.24376	2.65987e-05
P2ry13	2.24357	2.83332e-05
Itgb2	2.24285	9.35807e-06
Xdh	2.23995	7.36632e-06
Cxcl1	2.23702	0.000109699
Itgam	2.23658	7.47179e-05
Ccl9	2.23601	7.04249e-06
Parp9	2.23449	1.90727e-06
Ms4a8a	2.23263	1.38035e-07
Rasa4	2.22562	2.74239e-07
Cyth4	2.2236	2.56337e-05
Ddx58	2.22145	4.37392e-06
Dck	2.21989	1.57085e-05
Lair1	2.21316	2.09419e-07
Lgmn	2.21007	1.28313e-06
Cst7	2.20522	0.000297356
Tnfrsf1b	2.20437	2.19544e-05
Pilra	2.20308	0.000378918
Tnfsf9	2.19483	9.02139e-08
Rtn4rl2	2.19112	1.4541e-05
Fcgr2b	2.19076	0.000444564
Prm1	2.18836	1.51066e-05
Cd86	2.18631	8.17797e-05
Slc7a5	2.18562	6.33824e-10
Csf2rb	2.1839	1.08528e-05
Ly6a	2.18287	8.42598e-11
Ccr2	2.18274	0.00122101
Adgre1	2.18229	3.28446e-05
AB124611	2.17297	0.000346649
Fcgr3	2.16735	0.000114259
C2	2.1657	6.51691e-06
Sla	2.16484	3.83233e-06
Was	2.16259	9.91768e-06
Bcl2a1d	2.16129	0.000384238
Dusp5	2.15753	9.48954e-09
Clec5a	2.1574	1.33335e-05
A530064D06Rik	2.15472	1.53188e-06
Klra7	2.15431	7.76574e-07
Clec4a2	2.14951	3.7078e-07
Gbp4	2.14746	0.00839225
Alpl	2.14688	2.61413e-06
Sh3bp2	2.14581	4.37039e-06
Sp110	2.14484	7.21101e-05
Plekha4	2.14202	4.91451e-06
Ccne1	2.13752	6.50799e-06
Ifng	2.13594	0.0118746
Sema4d	2.13267	6.2398e-05
Pira6	2.13198	3.75573e-06
Tubb3	2.12995	0.00376422
Trafd1	2.12928	5.60874e-06
H2-T-ps	2.12756	5.19725e-09
Milr1	2.12459	1.71116e-07
H2-L	2.12199	2.09262e-08
Il27	2.11985	0.000136387
Sell	2.11432	0.00344222
Il12rb1	2.10951	0.000215689
Sesn2	2.10941	1.05929e-06
Sh2d1b2	2.10461	2.05722e-05
C1qc	2.10358	4.73708e-05
Gpr35	2.10086	7.48069e-06
Il21r	2.09956	0.00194954
Gm9733	2.094	0.00599376
Trim21	2.0932	1.93168e-06
Bcl2a1a	2.09266	0.000597623
Rpph1	2.08832	0.000386472
Cd300ld	2.0838	1.79209e-05
Capg	2.07822	3.1809e-06
Tnfrsf9	2.07805	0.000180541
Tbx21	2.07549	5.44075e-05
Lif	2.07283	3.40716e-05
Tspan4	2.07041	1.04693e-06
Pstpip1	2.06911	0.000165755
Ly6c1	2.0667	1.00032e-05
Slc25a25	2.06652	2.48593e-08
Trim69	2.06525	1.88407e-08
Rnf19b	2.06392	3.39328e-05
Psmb10	2.06171	0.000388587
F3	2.06099	5.15204e-07
Cd69	2.05803	0.00051699
Trem3	2.05697	0.00290477
Irf9	2.05653	6.69891e-10
Fermt3	2.05611	6.48422e-06
Apol6	2.05448	0.000339467
H2-M3	2.05082	3.17411e-07
Cd80	2.04387	3.64641e-07
Mcemp1	2.04171	7.22528e-07
Rab32	2.03978	8.38536e-05
Retnlb	2.03832	1.21858e-06
Klra18	2.03564	8.61184e-06
Il10ra	2.03477	4.57507e-05
Mthfd2	2.03383	6.4819e-06
Ear12	2.03364	0.000210765
Gdf3	2.03269	7.94136e-07
Tifab	2.03245	0.000130835
Tmem86a	2.03105	3.12724e-06
Fpr2	2.02711	0.000475765
Phlda1	2.02327	1.30665e-06
Eif2ak2	2.02224	7.50502e-05
Gbp8	2.02084	0.00445977
Casp1	2.01439	0.000361586
Csf2rb2	2.01362	5.20615e-05
Pnp	2.01189	6.13255e-05
Spp1	2.01145	0.00139918
Parp14	2.0078	0.000193666
Cxcl16	1.99858	1.70259e-06
Misp	1.99566	0.000119553
Pnp2	1.99067	0.000111305
Gm4070	1.99057	0.00076296
1600014C10Rik	1.98371	7.76848e-05
Acp5	1.98254	3.8137e-05
Cyba	1.98041	1.16059e-05
Areg	1.98014	0.000219519
Gpr171	1.97605	0.00049727
Gins2	1.97468	0.000167647
Hck	1.97388	3.12476e-05
Snai1	1.97205	5.15398e-07
Arg2	1.96394	0.00105585
Pira1	1.96352	0.00121475
A630012P03Rik	1.96343	6.9108e-08
Gzmk	1.95878	0.0127119
Gla	1.95843	1.30875e-06
Cd48	1.95828	0.000136644
Pbp2	1.95794	1.70248e-06
Myo1f	1.95762	0.00129317
Ccl8	1.95705	0.0308627
F830016B08Rik	1.95553	5.6348e-05
Slc37a2	1.95503	3.65963e-05
Serpinb9b	1.95499	8.52813e-05
Ifi35	1.9541	1.34563e-05
Il24	1.95263	1.15079e-05
Coro1a	1.95194	0.000299028
Mt2	1.9507	0.0107032
A530032D15Rik	1.94826	2.92398e-05
Zc3h12a	1.94802	4.05678e-06
Znfx1	1.94579	2.34841e-05
Tmem173	1.94525	0.000491698
Psca	1.94515	0.000182515
Cd177	1.94355	0.000716416
Ppa1	1.94155	0.000173688
Tgm1	1.93845	1.87853e-06
Selplg	1.93658	7.15216e-05
Slc2a6	1.93456	5.59305e-05
Ctsh	1.93197	4.57051e-05
Ly9	1.92747	6.35033e-06
Vav1	1.9269	0.000154161
Gda	1.9216	4.00972e-06
Laptm5	1.91963	5.43279e-07
Ncr1	1.91897	0.00178285
Cd84	1.91729	9.83938e-07
Fgl2	1.91516	0.000859879
Tnfaip3	1.91323	1.27838e-05
Gpr65	1.91268	0.000301459
Tifa	1.90789	0.000398362
5430437J10Rik	1.90752	1.37569e-05
Tubb6	1.90635	0.000248497
Mitd1	1.89857	1.6228e-06
Cstb	1.89286	7.00694e-05
Csf1	1.89276	7.92238e-06
Isg20	1.89194	0.000152933
Mettl2	1.8915	3.53891e-07
Ncf2	1.89098	4.45434e-06
Adamts4	1.88643	1.20246e-05
Nfkbie	1.88475	8.81238e-06
Adar	1.88467	4.21425e-07
Itgax	1.87823	0.000274765
Parp10	1.87801	0.000111757
9930111J21Rik2	1.87777	7.43668e-06
Gm17757	1.87735	0.000313891
Gm14085	1.87507	0.000792039
Plin2	1.87224	4.1186e-06
Grn	1.87033	3.33727e-07
Ptpn6	1.86635	0.000715735
Rab20	1.86304	0.000100577
Chil3	1.86114	0.0014611
Egr2	1.85407	1.10068e-05
Sdc3	1.85314	4.2311e-05
Cdt1	1.85125	2.29203e-06
Glrx	1.85029	0.000163705
Il2ra	1.84427	0.000375207
Clca3a1	1.84194	0.000248793
C5ar1	1.83395	0.000174577
Dpep2	1.83226	2.61495e-07
Parvg	1.83179	1.55947e-05
Gpr18	1.83003	0.00291271
Gm1123	1.82943	1.11367e-06
Cotl1	1.82075	3.65445e-05
Ccno	1.81375	0.000263686
Ptger4	1.8089	3.35665e-05
Bex6	1.80847	1.02176e-06
Ifrd1	1.80778	4.34795e-07
Dnase1l3	1.8051	0.00116442
Cyp7b1	1.80467	0.00090913
Slc19a2	1.80466	1.88008e-08
Coro2a	1.8044	5.56041e-06
AI662270	1.80125	0.000623013
Ly6e	1.79886	1.00331e-10
Smpdl3b	1.79735	0.000707305
Apobec3	1.79567	5.33495e-05
Gbp9	1.79148	0.0133933
Cd244	1.78919	0.000478112
Psat1	1.78784	8.35688e-06
Gbp7	1.78694	0.00119882
Gm38431	1.78664	0.014362
Gm15133	1.7857	1.37407e-06
Apol10b	1.77658	0.00614876
Gbp11	1.77425	0.000377337
Sp100	1.77201	0.000151209
Neurl3	1.76407	0.000656709
Irf8	1.76068	0.000498305
Pilrb1	1.76036	0.00535801
Mndal	1.75929	0.00411803
Rnf225	1.75864	2.91164e-05
Tbxas1	1.75832	0.000792039
Alox5ap	1.75705	3.88355e-05
Chac1	1.75314	1.34e-05
S100a4	1.74963	0.00387111
Tnfaip2	1.74779	8.01691e-05
Epha2	1.74573	1.11575e-05
Irf1	1.74362	0.00149969
Plat	1.74154	0.00252463
Speer4c	1.74074	0.000130835
Aldh1b1	1.7393	0.00120167
Klk1	1.73818	0.0217669
Bambi-ps1	1.73742	1.36309e-05
2810417H13Rik	1.73669	0.000823942
Pgf	1.73624	5.4881e-07
Ogfr	1.73287	2.05009e-06
Ifi203	1.73271	0.00190054
Slc39a14	1.73247	3.09184e-06
Klrg1	1.73121	8.93991e-05
Mir449c	1.73049	0.0147724
Fst	1.72557	0.00190877
Rnf149	1.72339	3.96701e-05
Emilin2	1.72316	0.000238982
Mxd1	1.72244	0.000142935
Tfpi2	1.72129	0.000529387
Psme1	1.72106	8.37352e-06
Cd200r1	1.72082	8.00218e-05
Nmi	1.71961	0.000363412
Snx10	1.71953	9.80573e-05
Tor3a	1.71617	7.68095e-08
Ccdc86	1.70981	1.41581e-05
Adap1	1.70587	0.0001175
Plaur	1.7052	8.91404e-06
Uba7	1.70323	0.00517636
Tspo	1.70287	2.1051e-06
Litaf	1.7019	1.37106e-05
Psme2	1.7011	0.000793023
Tmem37	1.70057	0.00111047
Lgals1	1.69657	0.000869649
Adssl1	1.696	8.55551e-09
Crlf2	1.6949	2.18248e-05
Tk1	1.69369	0.000547586
Stra6l	1.69272	8.1303e-10
Metrnl	1.69269	0.000331285
Ptx3	1.6916	0.012548
C1rb	1.6893	1.05929e-06
Chaf1b	1.68927	9.35807e-06
Sertad1	1.68798	6.50603e-09
B4galt5	1.68207	1.16584e-05
Fosb	1.67859	0.00615117
Nampt	1.678	2.97817e-05
Apbb1ip	1.67498	7.38905e-06
Bcl3	1.67366	0.000148838
Pdcd1	1.66762	0.00935968
Ctps	1.66323	2.25834e-06
Rad51	1.66226	9.65053e-05
Tlr7	1.6614	2.86185e-08
Ctsz	1.66091	5.047e-06
Snhg15	1.66027	3.03093e-06
Cxcr3	1.65881	0.015431
Axl	1.65825	8.59084e-08
Tlr1	1.65767	0.000883415
Il18rap	1.6511	0.00149696
Mir6972	1.64896	0.00266563
Mcm5	1.64793	0.000528859
Rgs1	1.64722	0.00276466
Thoc6	1.64234	1.77981e-07
Rab7b	1.64198	8.70158e-05
Saa2	1.64133	0.000113052
Sh2d2a	1.63384	0.000375505
Tfec	1.62962	0.000128216
Adm2	1.62779	1.67012e-08
C130050O18Rik	1.62494	2.58958e-06
Fam49b	1.62449	7.00157e-05
Tapbpl	1.62274	0.000462721
Fxyd5	1.62243	9.45415e-06
Treml2	1.61833	0.00564251
Hpse	1.61586	0.000109932
Glipr2	1.61568	0.000204103
Ass1	1.61305	0.00175845
Relb	1.61178	5.17579e-07
Sat1	1.61167	7.38905e-06
Ptges	1.60942	0.00275933
Gjb5	1.60818	8.15006e-05
Slfn3	1.60646	0.00105331
Pmvk	1.60635	0.0034087
Gpr15	1.60591	0.000242505
Tnfsf8	1.60521	6.46598e-07
Slc29a3	1.60483	0.000444564
Mmp19	1.60316	0.00014934
Ppfia4	1.59993	3.92996e-05
Il4ra	1.59793	0.000863479
Slpi	1.5978	0.005315
Ctsb	1.59616	4.35674e-06
Ifit1bl2	1.59477	4.98854e-06
Dnase2a	1.58619	2.84346e-07
Cdk1	1.58612	0.0022598
S100a14	1.58582	0.0128357
Myd88	1.58428	0.000108292
Klhl6	1.58388	0.000326466
Nuak2	1.58284	1.70259e-06
Insl6	1.57828	0.00305193
Susd3	1.57696	0.000154222
5430427O19Rik	1.5759	1.27253e-05
Cdca3	1.57418	0.000764062
Ugt1a7c	1.57363	0.000249354
Il3ra	1.57314	6.09457e-08
Fhl3	1.57076	8.92281e-05
Fyb	1.56579	0.00216593
C1ra	1.56478	2.12918e-07
H2-Q2	1.56423	0.000111305
Il7r	1.56359	0.000367382
Cd47	1.55889	8.06584e-06
Mad2l2	1.55428	8.55636e-09
Ripk3	1.55201	0.000692829
Rac2	1.54991	0.00197003
Ccnb1	1.54962	0.0013347
Pydc3	1.54749	0.045949
1600010M07Rik	1.54586	2.01882e-05
Tmem219	1.54167	2.47354e-06
Kcnn4	1.54078	0.00146809
Npc2	1.54039	1.76991e-09
Nckap1l	1.53971	0.000786909
Hmga2-ps1	1.53941	0.000108492
Ctsk	1.53843	0.00142647
Ier5	1.53828	2.26802e-07
Cdca5	1.53662	0.000715735
Arhgap30	1.53653	0.00159781
Ereg	1.53493	0.00059727
Asf1b	1.5326	0.00144467
Bdkrb1	1.53096	0.00275058
Atp8b4	1.52927	0.000120994
Gm6377	1.52659	2.62496e-06
Gsdmd	1.52466	0.000392982
Trim14	1.52435	0.00013847
Ssc5d	1.52356	2.46844e-05
Sap30	1.52253	0.000151759
Tap2	1.52146	3.30963e-05
Klrd1	1.51848	0.00116719
Syt12	1.51823	2.648e-05
Mov10	1.517	0.00054062
Samhd1	1.51658	7.91521e-05
Ptpn7	1.5157	0.00183216
Tlr6	1.51497	8.17797e-05
Ear10	1.51353	0.00679428
Hap1	1.51175	0.000164998
D730005E14Rik	1.51161	0.000293648
Pcgf5	1.51159	9.0374e-05
H2-T24	1.51048	0.0175925
Samsn1	1.50908	0.00158256
F7	1.50884	0.000708896
Dok2	1.50579	0.0044352
Angptl8	1.50345	1.06408e-06
Soat2	1.50144	0.000792039
AW011738	1.50138	0.0022296
Zswim4	1.50115	1.14909e-06
Pml	1.50106	0.000369936
Cd207	-1.50055	1.34563e-05
Scn3b	-1.50061	0.00454995
Cpb1	-1.50167	0.0380457
Lgr6	-1.50826	0.000844399
Trp53bp2	-1.50841	7.32892e-06
Rassf3	-1.51093	3.27377e-06
Mia	-1.51442	0.00101484
Mfap4	-1.51531	0.00176756
Rasgrp3	-1.5195	0.00225373
Erdr1	-1.51953	0.0413183
Cdh13	-1.53017	0.00027708
Ces2e	-1.5329	4.94619e-05
Col4a6	-1.53379	2.46347e-05
Gpt	-1.53625	0.00253342
Mir6516	-1.54136	0.00225201
Zdhhc14	-1.54301	1.12362e-05
Mmp15	-1.54611	5.63054e-05
Chd3	-1.55083	0.000229246
Sost	-1.55159	9.37607e-05
Igip	-1.55206	0.000464108
Ogt	-1.55438	0.000818748
Sfrp2	-1.55463	0.00767862
Ccdc108	-1.55633	0.00838515
Mybpc3	-1.56312	0.0328413
Eln	-1.56822	0.0228136
Ephx1	-1.56838	0.000234062
Smarca2	-1.5733	4.9527e-06
Mapt	-1.57502	0.000178385
Try5	-1.57662	0.0198251
Zg16	-1.57804	0.0127198
Clec11a	-1.58157	0.00017016
Cfap100	-1.58209	0.00133439
Cela3b	-1.58885	0.0200518
Ptgfr	-1.58998	3.56043e-07
Gdf10	-1.59222	2.79146e-05
Ogn	-1.59276	0.00627727
Colgalt2	-1.59402	0.000150244
2610507I01Rik	-1.59808	0.000126504
Riiad1	-1.60052	0.00421539
Angpt4	-1.60423	3.64641e-07
Atp1a2	-1.60532	0.00329579
Npnt	-1.60622	8.38536e-05
Hspg2	-1.60819	1.34e-05
Hist2h3c2	-1.60909	1.6252e-08
Rasgrf2	-1.60925	6.08993e-05
B430010I23Rik	-1.61208	0.0132618
Nptx1	-1.61539	0.0012432
Daam2	-1.61744	0.000578678
Art4	-1.61978	2.64813e-05
Fam189a2	-1.62081	0.000792039
Mesp1	-1.62152	2.11892e-06
Prickle1	-1.62171	1.10345e-05
Mettl7a2	-1.62289	0.00024908
8430408G22Rik	-1.62336	0.0193039
Ccdc17	-1.62442	0.00251551
C130080G10Rik	-1.62463	0.000792621
Gm20300	-1.62575	2.94026e-06
Efcc1	-1.62593	7.303e-06
Synm	-1.6273	3.34896e-06
Hsph1	-1.62836	2.10631e-05
Mettl24	-1.62879	5.981e-07
C2cd4b	-1.62979	0.000297785
Fzd2	-1.63106	8.98709e-07
Stmnd1	-1.6319	0.00317324
Wdr63	-1.63246	0.000546663
Ccdc129	-1.63259	0.00343277
Npr2	-1.63488	0.00014486
Hopx	-1.63513	0.000866495
Lrat	-1.63563	0.00683288
1810019D21Rik	-1.63564	5.50536e-05
Pnisr	-1.636	0.000214916
Cpa1	-1.63856	0.0180652
Macf1	-1.64573	0.000174577
Nrbp2	-1.65489	0.002768
Mir145a	-1.65521	0.00277304
Trim63	-1.6567	0.0097756
Rida	-1.66046	1.12199e-05
Cox6a2	-1.66299	0.00591482
Fndc5	-1.6631	0.00304887
Hist1h1d	-1.66384	1.10323e-06
Prss2	-1.66542	0.0332339
Glp1r	-1.66564	0.040358
Amy2a5	-1.6677	0.0212388
Fmod	-1.67037	1.22614e-05
Firre	-1.67471	0.00914538
Wscd1	-1.67544	0.000686806
Igsf10	-1.67786	4.02868e-07
Nrep	-1.6788	9.53469e-05
Fam193b	-1.68471	0.00291815
Palmd	-1.68709	0.000102816
Col4a5	-1.69136	0.000302295
Wfdc10	-1.70995	0.000807786
Wif1	-1.71749	1.94227e-05
Rnf144a	-1.72493	3.39905e-06
Cbr2	-1.72707	0.00226887
Scube2	-1.72903	0.00134825
Spock2	-1.7366	0.00780918
Rnase1	-1.73724	0.00704039
Mettl7a1	-1.74088	0.0030095
Wnt10b	-1.74502	6.34237e-05
Ndst1	-1.74675	5.24686e-07
Sh3bgr	-1.74884	1.91395e-05
Stmn2	-1.75633	0.00510838
Aox3	-1.7611	0.00912365
Chad	-1.76129	0.0387192
Gm11627	-1.76363	7.17478e-05
Itgb1bp2	-1.76487	0.00316121
Limch1	-1.77253	0.00026306
Tspan18	-1.77303	0.016287
Tspan2	-1.77492	0.00142921
Aox1	-1.77694	1.15815e-05
Gpc3	-1.77743	4.91451e-06
Doc2g	-1.7796	0.00184161
Cd209f	-1.78756	0.000105585
Apln	-1.79201	0.0130509
Gstm1	-1.79582	0.00295173
Mir568	-1.80896	0.00686797
Myh7	-1.80907	2.48611e-05
Prdm8	-1.80956	1.12179e-08
S100g	-1.8153	0.00210773
Itga8	-1.81603	0.000120994
Myl1	-1.81824	0.0474692
Cnn1	-1.81964	0.00990955
Car14	-1.82599	0.000214916
Lypd2	-1.8341	0.0194452
Fgfr4	-1.83606	0.000189052
Tmem100	-1.83857	0.00168837
Cpm	-1.84012	0.000196485
Aldh1a1	-1.84313	0.000457494
Adrb3	-1.85198	1.15815e-05
Fbln5	-1.85211	6.76936e-06
Aldh3a1	-1.85543	0.0422778
Igfbp3	-1.85918	0.00571098
Scgb1c1	-1.86426	0.00492152
Fgf1	-1.87323	0.000205247
Slc4a5	-1.88406	1.05938e-05
Cdc42bpg	-1.88424	0.000573519
Serf1	-1.8862	1.3559e-05
9230117E06Rik	-1.89279	5.84237e-05
Spink4	-1.89567	0.0017224
Ltbp4	-1.91456	0.00015955
Cyp4a12b	-1.92265	0.0428066
Thbs3	-1.93121	5.49606e-07
Krtap17-1	-1.93441	0.0183601
Wnt3a	-1.93561	0.000402579
Scd2	-1.94715	0.000114175
Dnah6	-1.94972	2.346e-05
9630028I04Rik	-1.95864	1.27999e-05
Klhdc8b	-1.96216	3.33113e-05
Pnlip	-1.96217	0.00594576
Mamdc2	-1.96625	0.000100652
1700024G13Rik	-1.97602	0.00707367
2210011C24Rik	-1.98063	0.000175898
Myh14	-1.98168	9.73367e-05
Edn3	-1.98616	2.58958e-06
Dhrs7c	-1.98959	0.00889121
Pde5a	-1.99902	1.27229e-05
Try4	-1.99923	0.006404
Sec14l3	-2.00194	0.000234796
Bpifa2	-2.01091	4.37392e-06
Pnliprp1	-2.0233	0.00285103
Fabp3	-2.02937	0.0167042
Clec3b	-2.03417	2.53324e-05
Fcrls	-2.03815	6.36469e-06
Tnnc1	-2.04414	0.0278916
Adamts17	-2.06558	1.091e-08
Asgr1	-2.07104	2.91203e-05
Neat1	-2.08255	0.0387878
Hist1h4h	-2.08278	4.38709e-06
Pdzd2	-2.08951	0.000242757
Gsta2	-2.08977	0.00222395
Igfbp2	-2.09237	0.00311596
Ctrb1	-2.09562	0.0301475
Cytl1	-2.09811	0.0210743
Pcdh12	-2.09831	6.0413e-05
E030019B13Rik	-2.11669	5.08165e-05
Pon1	-2.12972	0.0132334
Atp6v1b1	-2.13343	0.00189209
Cyp2f2	-2.13478	0.00470555
Col4a3	-2.13639	0.00155317
Hepacam2	-2.13702	1.5983e-11
Fendrr	-2.13741	0.00529539
Carmn	-2.15585	3.17265e-05
Snhg20	-2.17041	0.000869649
Tnnt2	-2.20192	0.0183375
Cped1	-2.20398	0.000264699
Scgb3a2	-2.21475	0.00360738
Ces1e	-2.21825	6.73546e-05
Actn2	-2.2275	0.0231181
Hrc	-2.23025	0.00296669
Ackr4	-2.24719	3.08186e-06
Lama3	-2.29293	1.46623e-06
Cela2a	-2.31908	0.00404297
Fabp1	-2.32496	0.000288587
Hba-a2	-2.34093	0.0402395
Scn7a	-2.34421	4.16572e-06
Rgs11	-2.36792	0.00031824
Hc	-2.37394	0.00153428
Tril	-2.3832	3.48742e-08
Akap5	-2.39896	1.47716e-05
Mgl2	-2.40244	4.83284e-07
Wfdc1	-2.47689	4.65155e-08
Slc7a10	-2.49495	4.57507e-05
Ces1g	-2.54896	3.49105e-05
Cox7a1	-2.55316	0.00458245
Casq2	-2.55808	0.00377727
1810011O10Rik	-2.56545	8.54002e-09
Pcolce2	-2.62053	3.33565e-06
Cox8b	-2.66484	0.00966548
Npr3	-2.70772	0.000222017
Hist1h1e	-2.74702	2.71729e-08
Mybphl	-2.79091	0.0124809
Myl3	-2.854	0.0154032
Aplnr	-2.89169	4.89856e-05
Cd209a	-2.93351	8.70719e-07
Myoz2	-2.94564	0.0118002
Actc1	-2.95277	0.00151275
Ckmt2	-3.01645	0.00497727
Ces1f	-3.05837	0.000154731
Rtkn2	-3.12412	0.000102359
Csrp3	-3.13762	0.00467815
Colq	-3.17051	7.63708e-06
Tff2	-3.21775	0.0472139
Myl4	-3.30973	0.0059314
Tnni3	-3.33573	0.0100891
Sln	-3.38856	0.0297715
Car3	-3.41626	0.0428066
Cyp1a1	-3.61023	3.61952e-06
Ckm	-3.70544	0.00518684
Myl7	-3.71933	0.011684
Mb	-3.79671	0.00394442
Myh6	-3.88969	0.0010911

## Sheet: STable4. Alpha 6dpi
GeneID	Log2 Fold Change	FDR Value
Cxcl10	6.99342	1.90101e-07
Irf7	5.67107	9.5703e-14
Arg1	5.22558	5.53583e-06
Ccl2	5.18152	1.66524e-05
Cxcl9	5.15105	1.33984e-06
Saa3	5.04355	1.07436e-05
Rsad2	4.95667	2.08478e-07
Trem2	4.63972	2.00684e-07
Sprr1a	4.58025	8.00654e-07
Il1r2	4.57302	6.09685e-05
AA467197	4.5554	1.87614e-05
Isg15	4.40338	6.91905e-07
Ifi204	4.37318	3.78916e-06
Serpina3m	4.27744	1.05708e-06
Ms4a6d	4.20964	2.10831e-07
Retnla	4.14413	1.04799e-06
Ccl7	4.14227	0.00144667
Fcgr4	4.11115	8.29144e-07
Zbp1	4.08506	6.91905e-07
Fcgr1	4.06919	8.60092e-06
Oas3	4.06269	4.38774e-08
Gm12250	3.97976	1.10226e-05
Gpnmb	3.94737	7.22507e-07
C3ar1	3.90344	1.73001e-06
Pla1a	3.87209	1.99169e-08
Apol9a	3.79146	1.26351e-08
Mx1	3.78906	2.42879e-06
Timp1	3.75216	2.54278e-05
Serpina3g	3.74911	1.06989e-05
Apoc2	3.74493	7.38082e-07
Ifi205	3.74306	4.99165e-05
Oas1g	3.7334	7.22507e-07
Ms4a6c	3.7299	7.64267e-08
Mnda	3.72983	2.80394e-05
Orm1	3.72243	5.44931e-08
Mt2	3.72199	1.57384e-05
Chil3	3.70319	2.19032e-07
Ear6	3.70046	6.01225e-06
C1qb	3.68219	9.97406e-09
Oasl1	3.67634	5.80948e-05
Ccl4	3.65884	0.000108222
Fkbp5	3.65036	4.63316e-05
Ifit3	3.61234	7.68933e-09
Oas1a	3.60313	3.74e-06
Serpina3f	3.58439	8.73563e-05
Tgtp1	3.57923	4.21479e-06
Apod	3.5555	3.91361e-06
Irgm1	3.50338	3.38938e-07
Ifit1	3.48797	4.38774e-08
Ly6c2	3.47092	3.46081e-07
Iigp1	3.46883	5.26793e-06
Msr1	3.4485	4.99336e-07
Cldn4	3.41505	6.96648e-06
Spp1	3.38997	2.47937e-06
Ly6i	3.38706	1.47519e-05
Ifit3b	3.35934	1.21591e-07
Wfdc17	3.34973	0.000221816
Serpinb9b	3.3338	1.59093e-08
Ctss	3.31546	1.99169e-08
Serpina3n	3.3077	1.25192e-07
Il18bp	3.27918	2.05038e-06
Mmp8	3.27608	3.40656e-05
Ccr1	3.27246	3.28199e-05
Acod1	3.26626	4.95794e-05
Cfb	3.26167	1.75567e-06
Igtp	3.23547	4.49284e-06
Fosl1	3.22708	4.38774e-08
Prss22	3.22392	2.6489e-07
Ubd	3.21249	0.00056704
Apol9b	3.20615	8.69927e-08
Ccr5	3.19849	0.000351229
Cd274	3.18673	9.16783e-06
Ifit2	3.1755	5.90175e-05
Gzmb	3.16524	0.00154083
Tmem37	3.15978	3.56043e-07
Cxcl13	3.15043	8.86662e-05
Gbp5	3.14038	0.000120107
Cyp4f18	3.13055	3.17681e-08
Lilrb4a	3.12774	2.14077e-06
Ifi27l2a	3.12688	1.15376e-06
Tlr13	3.0958	7.37706e-08
Dhx58	3.09381	7.24837e-06
C1qa	3.08748	3.30827e-07
Gatm	3.08018	0.000258171
AI607873	3.07582	1.15376e-06
Ms4a4c	3.04926	0.00371684
C1qc	3.01666	3.26531e-07
Arg2	3.01652	4.93491e-06
Pla2g7	3.01291	8.61991e-06
Cd68	3.00322	1.00738e-08
Lcn2	3.00207	7.11023e-07
Slfn1	3.00165	0.000150526
Tarm1	2.99963	0.000119666
Fam26f	2.99561	0.00147894
Tgtp2	2.99288	2.62092e-05
Ackr1	2.9681	6.57425e-05
S100a14	2.96113	1.73148e-05
Tgfbi	2.95932	1.42551e-05
Tnip3	2.94743	1.90101e-07
Ccl12	2.94613	0.0072228
Tnfrsf12a	2.92897	1.35479e-07
Efcab3	2.92376	4.5481e-07
Ccl3	2.92173	0.00019412
LOC100038947	2.91824	3.53231e-06
Gbp2	2.89401	0.000606627
Lilr4b	2.87311	8.61991e-06
Lrrc25	2.8659	7.84614e-05
Fcgr3	2.86336	3.48737e-06
Ctsh	2.86041	1.90098e-07
Ms4a4a	2.85727	3.86321e-07
Mt1	2.85382	0.000122399
Rpl26	2.84914	0.0158935
Cd300lf	2.84802	1.15376e-06
Fst	2.83667	3.74e-06
Socs1	2.82413	0.00146188
Ch25h	2.80315	1.47519e-05
Usp18	2.79841	1.07403e-05
Tat	2.79528	0.00921426
Ms4a7	2.77994	4.39818e-05
Slc11a1	2.76928	1.42551e-05
Trex1	2.76156	2.74301e-06
Ifi47	2.76079	0.00012179
Ms4a6b	2.75512	4.9517e-05
Ifng	2.74876	0.0013243
Siglec1	2.74405	1.7782e-06
Rpph1	2.7386	1.24841e-05
Rtp4	2.7109	1.14398e-07
Gm5431	2.69845	1.3717e-05
Gm4841	2.65739	9.18705e-05
Lgals3bp	2.6528	1.2988e-08
Hspa1a	2.65227	0.00128493
Xcl1	2.65182	0.00413811
Slc15a3	2.64775	2.13073e-05
Phgr1	2.64742	0.000225908
Rasl10b	2.64385	6.3997e-05
Gbp6	2.64028	0.000360336
Gbp10	2.63486	0.000766543
Rbm3	2.63374	2.2347e-07
Slfn2	2.62146	1.31823e-05
Fcer1g	2.60186	5.37538e-06
Hmga1-rs1	2.60095	3.74e-06
Clec4e	2.58925	8.45103e-05
Slc26a4	2.58707	0.000703115
Tap1	2.57839	1.15811e-06
Mpeg1	2.56083	2.74662e-07
Cxcl1	2.55776	2.08512e-05
Retnlg	2.55357	0.00989199
S100a8	2.54527	0.0218423
Slc7a5	2.54423	4.8432e-11
Psca	2.52761	6.76152e-06
Phf11d	2.52467	2.83341e-05
Ifi27l2b	2.52173	1.62311e-06
Gm4951	2.5089	5.38286e-05
Ereg	2.5009	1.05708e-06
Gm13363	2.49623	0.0289843
Tyrobp	2.49468	1.64954e-06
H2-T9	2.48589	7.68933e-09
Fcgr2b	2.4848	0.000115901
Aif1	2.47912	0.000983872
Ear3	2.47005	0.000417308
Chil4	2.46715	0.00279974
H2-Q9	2.46505	0.00118536
Arl11	2.4627	2.05038e-06
Il1rn	2.45374	0.00107642
Tbxas1	2.44866	1.34589e-05
Rtn4rl2	2.44841	3.89196e-06
Clca3a1	2.4417	6.70644e-06
Pbp2	2.44056	7.12933e-08
Socs3	2.42196	4.88242e-05
Clec7a	2.42161	8.3356e-05
Phf11a	2.41116	0.00114883
Lgmn	2.41065	5.67096e-07
Cd300c2	2.39874	2.04623e-06
Gbp3	2.39747	0.000204572
Ms4a8a	2.38954	9.60811e-08
Orm2	2.37918	1.85448e-06
Cybb	2.37041	1.54072e-05
Plac8	2.37033	0.00249497
Oasl2	2.36841	0.000121673
Stfa1	2.36209	0.000125389
Phf11b	2.3537	0.000710704
Lpxn	2.35264	3.08031e-05
Thbs1	2.34843	0.000212931
Tgm1	2.34565	1.25192e-07
Stfa2l1	2.34329	0.0144041
Rgs16	2.33233	2.15357e-05
Gjb4	2.33202	3.33583e-07
Ifi44	2.31971	0.000417715
Sirpb1b	2.31459	3.01474e-05
Gpr84	2.29126	0.000216183
Lgals3	2.28455	1.61096e-07
Gpr141	2.27606	0.000168062
Slc7a8	2.27572	0.000189169
Mafb	2.2731	8.1542e-05
Slfn8	2.25427	0.000701622
Adgre1	2.23965	3.01474e-05
Rmrp	2.23781	0.000160441
Sirpb1a	2.23767	0.000129965
Marco	2.23427	0.00087304
Bcl2a1b	2.2337	0.000285304
Spi1	2.2267	1.44063e-05
Myc	2.22534	1.83491e-08
H2-K1	2.20529	9.60404e-12
Ly6c1	2.20476	5.88398e-06
Hspa1b	2.20412	0.00529193
Gdf3	2.19363	4.01432e-07
H2-T23	2.19305	4.06668e-09
F3	2.1902	3.56043e-07
Sla	2.19004	5.20579e-06
Ugt1a7c	2.18944	2.96115e-06
Rab20	2.18521	1.47519e-05
Psmb8	2.18065	1.27559e-05
Tlr2	2.17241	3.37701e-05
Cxcl11	2.17159	0.00129394
Slfn4	2.16729	0.0258704
Gda	2.16558	9.42731e-07
Xaf1	2.16542	3.74e-06
Gm5483	2.16123	0.00775911
Tigit	2.15924	0.000446554
Ifit1bl1	2.15762	0.00185354
Sectm1a	2.14885	0.000620626
Pirb	2.14302	0.000446554
Ccl1	2.13739	0.000140434
Gfap	2.13191	0.0488871
Serpina3i	2.13147	0.000165382
Lgals9	2.12562	1.1962e-05
Itgam	2.12466	0.000178796
Doc2b	2.12133	0.0241246
Batf2	2.11854	0.00302873
Ccne1	2.11175	1.24841e-05
Lcp2	2.10268	0.000511008
Ctsd	2.09925	4.31442e-07
H2-Q7	2.09838	2.57034e-05
Hsd11b2	2.09592	5.65281e-05
H2-Q1	2.09164	4.06668e-09
Apoe	2.08906	3.00935e-05
Plek	2.08499	2.53508e-05
Tnfrsf9	2.07775	0.00021232
B2m	2.07753	3.61924e-10
Cotl1	2.07281	8.07499e-06
C5ar1	2.06575	4.46408e-05
H2-D1	2.05789	3.91126e-11
Acp5	2.05413	3.05045e-05
Dpep2	2.05371	7.12933e-08
Slc39a2	2.05061	8.02131e-06
Tspan4	2.04961	2.21227e-06
Mx2	2.04776	0.000224838
Cd180	2.04682	0.0033671
B430306N03Rik	2.04393	0.000134572
Atf3	2.04291	0.000115508
Gins2	2.04198	0.000130301
AB124611	2.04163	0.000799404
Rnf19b	2.038	5.07693e-05
Clec5a	2.03799	4.31868e-05
Sesn2	2.03454	3.56971e-06
Clec4n	2.03372	9.53129e-05
Cmpk2	2.03224	0.00191927
Igsf6	2.03033	0.000381491
Themis2	2.03003	0.0013517
Ptafr	2.02381	0.00168778
Cd53	2.02096	5.16767e-05
H2-T22	2.00983	3.93212e-08
Mcemp1	2.00778	1.79629e-06
Tmem213	2.00496	0.00251403
Saa1	2.00266	0.000611538
Sh2d1b1	2.00085	3.29502e-06
Tifa	1.9959	0.000272649
Selp	1.99349	0.0019017
Alox5ap	1.99077	9.13229e-06
Fkbp1b	1.99055	1.53618e-05
Aoah	1.99047	0.00283945
Gm21188	1.98449	0.00163633
Tmem86a	1.98365	7.22107e-06
Psat1	1.98244	2.67493e-06
Csf2rb	1.98083	6.00126e-05
Galnt15	1.97668	0.0150025
Ccnb1	1.97604	8.60817e-05
Ccna1	1.96697	7.28088e-05
Ppy	1.96531	0.00106246
Car13	1.95876	5.71276e-05
Apobec1	1.95868	4.84288e-06
Pld4	1.95844	4.63316e-05
Pycard	1.95795	0.0023555
Clec4d	1.95767	0.0010893
Il4ra	1.95689	9.53129e-05
Trem1	1.95616	0.000612354
Syt12	1.95511	7.22507e-07
I830077J02Rik	1.95327	0.00117093
Ear12	1.94516	0.000434484
Tacstd2	1.94354	3.74e-06
Ly86	1.93406	0.000201012
Pim1	1.92499	0.000476775
Glrx	1.92485	0.000116073
Rgcc	1.91834	0.00465737
Cd84	1.91735	1.87218e-06
Irgm2	1.91244	9.3262e-05
Fbp2	1.90295	2.17022e-05
H2-Q6	1.90029	3.74547e-07
Clec4a2	1.89947	5.96179e-06
Ccl9	1.89842	9.47489e-05
Slamf9	1.89485	0.000436436
P2ry13	1.89191	0.000353002
Cd276	1.8913	1.65716e-05
Clec12a	1.89028	0.00909357
Syngr1	1.88905	1.26674e-05
Slc19a2	1.88536	2.22009e-08
Tnfaip8l2	1.88423	0.000320932
Havcr2	1.88221	3.84326e-05
Ppa1	1.87703	0.000295507
Cdkn1a	1.87203	0.00647526
Itgb2	1.87152	0.000137503
2810417H13Rik	1.86834	0.000414327
Cyba	1.86828	3.54239e-05
Ube2l6	1.86797	0.000807136
Hcls1	1.86784	0.000356012
Emilin2	1.86345	0.000106157
Anxa1	1.86305	5.87283e-05
H2-Q8	1.86274	9.19074e-07
Krt18	1.86133	7.17312e-06
Pira2	1.85586	0.000214759
Cyth4	1.8554	0.000315534
H2-Q4	1.85493	1.11483e-08
Tk1	1.85492	0.000213046
Tnfrsf1b	1.8536	0.000249939
Trim30a	1.85324	0.000382511
Il27	1.85006	0.000747828
Gm5643	1.84608	0.043452
Krt8	1.84184	2.07205e-05
Tnfrsf4	1.83977	0.000495942
Snx10	1.83831	4.99165e-05
Xdh	1.83392	0.000142355
Tfec	1.82422	3.44694e-05
Klhdc8a	1.82384	2.17567e-05
Gm11127	1.82348	0.00375553
Slpi	1.82325	0.00169128
Pak6	1.8226	0.000533545
Sfn	1.81993	0.000160441
Olfr56	1.81941	0.000630639
Cd33	1.8158	1.80818e-05
Casp4	1.81563	0.00104013
Bst2	1.81454	0.000111927
Adssl1	1.8085	9.24248e-09
Psmb9	1.80266	0.000194852
Sphk1	1.80151	0.00170192
H2-L	1.80113	1.05708e-06
Ada	1.80081	0.00647526
Herc6	1.79991	0.0015468
Tnf	1.79955	7.99927e-05
Rab32	1.7989	0.000467414
Smpdl3b	1.79365	0.00081118
F10	1.79253	0.00340579
Wfdc21	1.79061	0.00424427
Irf5	1.78944	0.00116823
Cd300a	1.78937	8.54046e-05
Cdca3	1.78906	0.000195581
Mir7008	1.78587	0.000113844
2410006H16Rik	1.78065	1.53536e-05
Chaf1b	1.77806	6.76696e-06
Parvg	1.77229	3.57881e-05
Rnf149	1.77098	3.45987e-05
Myrip	1.77044	0.043452
F13a1	1.7687	0.000195712
Capg	1.76802	4.88242e-05
Fam107a	1.76414	0.0445277
Ctsb	1.76301	1.47974e-06
Rrm2	1.76187	0.000531759
Zc3h12a	1.75681	2.97564e-05
Pdgfc	1.75534	3.53231e-06
Pstpip1	1.75463	0.00120206
Csf2rb2	1.75272	0.000384685
Il6	1.74301	0.00342375
Ncf4	1.74273	0.00222106
2200002D01Rik	1.7426	0.000161162
Sh3bp2	1.73768	0.000134572
Adamts4	1.73463	5.65972e-05
Lrg1	1.72898	2.14077e-06
Pdcd1	1.72435	0.00714122
Cdkn3	1.72384	0.00155663
Mlkl	1.72061	0.00460918
Sectm1b	1.71884	0.00331048
Tnc	1.71476	0.0232067
Lox	1.71476	0.00801321
Cstb	1.71401	0.000274926
Pik3ap1	1.71366	0.00512322
Tlr9	1.70839	0.0255647
Cdk1	1.70509	0.00118236
Hexb	1.70502	1.883e-05
Scimp	1.7023	0.0215962
Ccnb2	1.69865	0.000658501
Pyhin1	1.69739	0.0261871
Rasa4	1.69611	3.95923e-05
Nampt	1.69571	3.36069e-05
Fn1	1.6936	0.000498607
Evi2a	1.68847	0.00124925
Ocstamp	1.68745	0.000782781
H2-Q5	1.68381	3.2805e-05
6030408B16Rik	1.68336	0.000429385
Dusp5	1.6796	2.61947e-06
Birc5	1.67845	0.00106246
Nfkbie	1.67708	6.94162e-05
Dtx3l	1.6748	0.000769593
Gm15133	1.6686	6.83777e-06
Trafd1	1.66811	0.000198827
Glipr2	1.66775	0.000159922
Daxx	1.66523	0.00111355
Tinagl1	1.6637	1.54072e-05
Parp9	1.66087	0.000165382
Plin2	1.65693	3.40916e-05
Plaur	1.65555	1.883e-05
Amica1	1.65359	9.53923e-05
Akr1b8	1.65275	0.000249939
Dnase2a	1.65274	2.87443e-07
Laptm5	1.64928	1.06989e-05
Clec4a1	1.64461	0.0116279
Tubb6	1.64198	0.00131758
Ndnf	1.64146	0.00445544
Ddx60	1.63898	0.00129245
Pnp2	1.63783	0.00114883
Epsti1	1.63287	0.00173998
Hck	1.6272	0.000426394
Snx20	1.62489	0.0048858
Tnfaip2	1.62043	0.000239137
Sin3b	1.61983	9.16783e-06
Cd164l2	1.61913	2.83484e-06
Fam89a	1.61473	2.40783e-05
Grn	1.61271	6.76152e-06
Lair1	1.61193	4.88242e-05
Ccdc86	1.61128	4.78251e-05
H2-Q2	1.61098	9.3262e-05
Stat1	1.61069	0.00768936
Gm5150	1.61034	0.00227613
Tdo2	1.60961	0.00127803
Snhg15	1.60379	8.57352e-06
Cirbp	1.60273	0.00238649
Clec4a3	1.59837	0.00057582
Tnfaip3	1.59452	0.000211945
Litaf	1.59176	4.78251e-05
1110038B12Rik	1.58953	4.79513e-06
Parp12	1.58651	0.000430801
Relt	1.58638	3.08031e-05
Ly6a	1.58509	1.90101e-07
Lat2	1.58339	0.000545524
Klhl6	1.58295	0.000386002
Tmem120a	1.58059	9.55413e-06
Bst1	1.57944	3.88906e-05
Ifnb1	1.57724	0.00168896
Nhp2	1.57628	6.56802e-05
Il10	1.57598	0.00176334
Ifih1	1.57467	0.000674701
Slfn3	1.57303	0.00137734
Milr1	1.57204	3.5672e-05
Nuak2	1.57198	3.50075e-06
Nfil3	1.57101	0.00104174
Ninj1	1.56936	0.000926477
Fermt3	1.56853	0.000319977
Lgals1	1.56676	0.00194763
Ifitm3	1.56675	0.000256361
Hk3	1.56364	0.0079924
Cd302	1.56158	8.96138e-05
Ccl5	1.55936	0.00852629
Fpr1	1.55717	0.00136133
Pydc4	1.55577	0.00569801
Fam49b	1.55197	0.000150841
Ctps	1.54925	1.06989e-05
Areg	1.54901	0.00306883
Gtse1	1.54872	7.34235e-06
Tspo	1.54834	1.3717e-05
Fgr	1.54647	0.0152331
Gm6904	1.54541	0.000140486
Sema6b	1.54484	5.11334e-05
Phlda1	1.54334	9.47263e-05
Gpr65	1.54292	0.00319659
Gzmk	1.54203	0.043452
Plekho2	1.54137	0.00134277
Cdca5	1.54127	0.000777792
Hcst	1.53879	0.00221712
Trim30d	1.53819	0.000813388
Sp140	1.53735	0.000338475
Ctsz	1.53576	2.2495e-05
Krt7	1.53515	2.5512e-05
Fpr2	1.53494	0.00727641
Pmvk	1.5295	0.00529737
Retnlb	1.52943	0.000101589
Tcf23	1.52292	0.043452
Ubtd1	1.52286	1.1962e-05
Ltb4r1	1.52247	0.0372757
Sat1	1.51679	2.52292e-05
Naip2	1.5153	0.000238673
Fxyd5	1.51518	3.44116e-05
Msrb1	1.51418	5.5415e-05
Capza2	1.5138	1.48619e-05
Ctse	1.50835	0.000662508
Cxcl16	1.50805	0.000128981
Slc16a6	1.50609	1.9303e-05
Kcnk1	1.50484	0.000504109
Pira6	1.5042	0.000563197
Tmem192	1.50386	1.00839e-05
Pnp	1.5035	0.00172875
Tfpi2	1.50346	0.00224091
Efhd2	1.50197	4.88242e-05
S100a6	1.50083	0.000326191
Il24	1.50063	0.000360336
Gm973	-1.50761	0.00221712
Adamts17	-1.50778	2.9372e-05
Lmod2	-1.50847	0.043452
Clec1a	-1.50958	0.0023555
Pitpnc1	-1.5115	5.07987e-05
Hist1h1d	-1.5123	1.15159e-05
Hfe2	-1.51314	0.0199248
Rassf3	-1.51427	5.20579e-06
Pcdh1	-1.51473	0.000861476
Tle2	-1.51803	0.000368168
Cdc42bpg	-1.51993	0.00471492
Nat8f7	-1.52471	5.53583e-06
Nat8f3	-1.5279	2.96889e-05
Mir7091	-1.52947	0.0095492
Itga1	-1.53148	0.000756772
Fam162b	-1.53176	0.00047336
Proca1	-1.53369	1.8389e-06
Asgr1	-1.53473	0.00319488
Mns1	-1.54027	0.00532123
Impdh1	-1.54244	3.3432e-05
Bex2	-1.54262	0.0322788
Ptgfr	-1.54579	9.09161e-07
Ccl22	-1.5458	0.00331666
Ldb2	-1.54595	7.23517e-06
Blk	-1.54634	0.000159142
Amy2a5	-1.5464	0.0335754
Bmp6	-1.55043	0.00308043
Cat	-1.55291	0.000662508
Hist2h2be	-1.55528	1.90101e-07
Srl	-1.56009	0.00148417
Adgre5	-1.56732	0.000496232
Sost	-1.56801	7.75973e-05
Meis1	-1.56863	8.01646e-06
Spns2	-1.56878	1.06989e-05
Aoc3	-1.56939	0.00122194
Pnisr	-1.56962	0.000418916
Rgs9	-1.57097	8.01646e-06
Gm20300	-1.57178	8.01646e-06
Dock6	-1.57291	0.00322937
Lama3	-1.57943	0.000523875
Malat1	-1.58465	0.00675917
Smpx	-1.58473	0.00944717
Nes	-1.58505	0.00306812
Cpa1	-1.58596	0.0215539
Cst8	-1.58822	0.00956408
Notch4	-1.58827	0.0108467
Stmn2	-1.58956	0.0110592
Pygm	-1.58989	0.00409444
Luc7l3	-1.59104	5.57356e-05
Ripply3	-1.59427	0.00130077
Mettl3	-1.59717	0.000320932
Chd3	-1.59732	0.000193979
Grem2	-1.59995	3.57881e-05
Cd207	-1.60427	3.61956e-06
Ces1e	-1.60581	0.00289012
Tubb4a	-1.60644	0.034056
Igip	-1.61001	0.000342473
Aox1	-1.61534	6.11253e-05
Prickle1	-1.61586	1.70118e-05
Snhg11	-1.61755	0.00723801
Slc4a5	-1.62099	0.000113566
Nptx1	-1.62441	0.00117093
Lhb	-1.62467	0.00148496
Thbd	-1.62993	0.00111222
E030019B13Rik	-1.63336	0.00119836
Pisd-ps2	-1.63352	0.00394744
H2-Ob	-1.63356	0.000379334
Cyp2f2	-1.63651	0.0310442
Mir5107	-1.63966	0.0239947
Gap43	-1.64455	0.00154255
Stmnd1	-1.64813	0.00303014
Fgf1	-1.64999	0.000991744
Alas2	-1.65085	0.043452
Fmo1	-1.65482	0.00397527
Pisd-ps1	-1.65789	0.00336179
Adrb1	-1.66	5.64217e-05
Tbx3	-1.66567	0.000292774
Siglecg	-1.67586	0.000810667
Kdr	-1.67808	0.00115236
Mapt	-1.67827	8.82899e-05
Rptn	-1.6798	0.0127112
Hepacam2	-1.68534	5.44931e-08
Acta2	-1.68716	0.000316109
Fam129c	-1.68821	2.85153e-05
Smarca2	-1.69144	2.67493e-06
Sox7	-1.6918	0.000220548
Gkn3	-1.69532	0.0015468
Hsph1	-1.69846	1.62401e-05
Firre	-1.70226	0.00790206
C130080G10Rik	-1.71655	0.000341681
Ltbp4	-1.72603	0.000617937
Adcy4	-1.7262	0.000159142
Kctd21	-1.73622	0.00270197
Ddx17	-1.74044	6.53007e-05
Synm	-1.74164	9.62304e-07
Tspan13	-1.74177	2.86149e-06
Gja5	-1.74266	0.00214454
Calcrl	-1.74462	0.00336938
Apobec2	-1.7491	0.0088289
Gstm1	-1.75432	0.00369828
Prdm8	-1.7595	4.38774e-08
Prss2	-1.76473	0.0191509
Rsrp1	-1.76877	0.00061713
Leng8	-1.77246	0.00261079
Ly6d	-1.77309	0.0220707
Gm14207	-1.77534	8.89463e-06
Klhdc8b	-1.78862	0.000140854
Clec3b	-1.79539	0.000174241
Bpifa2	-1.80151	3.31094e-05
Mtss1l	-1.80217	2.96115e-06
Npr3	-1.80674	0.0122358
Myl9	-1.80908	1.68858e-05
Atp6v1b1	-1.81617	0.00896848
Six5	-1.81875	1.45121e-07
Actg2	-1.82268	0.0022059
Pcolce2	-1.82626	0.000616743
Tspan18	-1.82645	0.0132713
Mybpc3	-1.82691	0.00693458
Slc2a4rg-ps	-1.82706	4.5836e-05
Pdzd2	-1.82903	0.00117004
Ankrd63	-1.83682	0.00033944
Pnlip	-1.83867	0.0104503
C2cd4b	-1.84466	7.10163e-05
Mir6935	-1.84897	0.000554269
Kit	-1.8658	1.86411e-05
Sh3tc2	-1.86633	7.21284e-05
Cd93	-1.8701	3.08655e-05
Try4	-1.87574	0.011053
Wscd1	-1.88153	0.000213261
Scn3b	-1.88769	0.000503636
Tbxa2r	-1.88997	8.912e-06
Hey1	-1.89176	0.000225632
Wnt10b	-1.89405	1.47519e-05
Cldn22	-1.89624	0.0310592
Rnase1	-1.91047	0.00216716
9230117E06Rik	-1.91338	4.07288e-05
Ccdc129	-1.9203	0.000614333
Palmd	-1.93448	2.10893e-05
Doc2g	-1.93512	0.000646562
Kank4	-1.93623	9.18359e-05
Spib	-1.93925	0.00117313
Tmem100	-1.95519	0.000947979
Lypd2	-1.95722	0.0120063
Dll4	-1.9574	0.000441473
Myh11	-1.96386	3.80666e-05
Fam193b	-1.97056	0.000703115
Dhrs7c	-1.9925	0.00680928
Arap3	-1.99365	3.12596e-05
Asb2	-2.00017	3.40916e-05
Sox18	-2.00275	0.00196308
Ppp1r16b	-2.00434	7.48456e-07
Myct1	-2.00681	9.91378e-06
Acoxl	-2.01438	0.000719268
Glp1r	-2.02577	0.011268
Tril	-2.03081	1.64954e-06
Arhgef15	-2.03501	9.84297e-05
Ces1g	-2.03728	0.000826117
Rnf144a	-2.04355	3.64479e-07
Hist1h1e	-2.04931	5.23923e-05
Retn	-2.06812	0.0204334
Aard	-2.06894	7.2606e-06
Rtp3	-2.07407	5.35848e-05
Pgam2	-2.07497	0.0185442
Thbs3	-2.08399	3.30827e-07
Pkn3	-2.09265	5.4941e-05
Fabp3	-2.09715	0.0133103
Mir145a	-2.10598	5.33351e-05
Cyp4a12b	-2.11319	0.0152331
Ppbp	-2.12609	0.000726484
Rgs11	-2.1293	0.0011808
Ctrb1	-2.15729	0.0185122
Cd79a	-2.15775	0.000544246
Itgb1bp2	-2.16954	9.67959e-05
1810011O10Rik	-2.17876	4.20029e-07
Ogt	-2.18277	1.37597e-05
Wfdc1	-2.18293	1.00436e-06
Sh3bgr	-2.18799	6.98573e-07
Hrc	-2.20522	0.00277814
Pde5a	-2.21328	4.34851e-06
Fcmr	-2.22389	0.000665821
Cela2a	-2.22728	0.00583617
Fam101a	-2.23559	4.21479e-06
B430010I23Rik	-2.2367	0.000816355
Ms4a1	-2.24778	0.000656538
Pax5	-2.26391	1.47519e-05
Mgl2	-2.27463	2.39258e-06
2610507I01Rik	-2.32819	6.76428e-07
Rbp7	-2.36147	0.0023258
Tnnt2	-2.44394	0.00849951
Ackr4	-2.4548	3.99207e-07
Scn7a	-2.45611	3.51583e-06
Hba-a1	-2.47852	0.0168107
Ces1f	-2.50548	0.00170993
Adipoq	-2.52088	0.0239947
Myl1	-2.56261	0.000791293
Slc7a10	-2.57429	3.5684e-05
Spon2	-2.628	7.28088e-05
Ushbp1	-2.63288	5.08601e-05
Hba-a2	-2.65069	0.018942
Rtkn2	-2.66197	0.000750197
Neat1	-2.6624	0.00750072
Actn2	-2.67971	0.00494133
Carmn	-2.68846	7.82684e-07
Cnn1	-2.69939	0.000263334
Myoz2	-2.72421	0.0195621
Rasgrp3	-2.76749	5.85788e-07
Hamp	-2.78463	0.0247633
Cd19	-2.7897	2.46813e-05
Fendrr	-2.80029	0.000420056
Fabp1	-2.84253	2.27469e-05
Tnnc1	-2.85658	0.00249304
Csrp3	-2.91083	0.0088289
Pcdh12	-2.92359	2.61544e-07
Cox7a1	-3.00873	0.00111355
Hc	-3.06562	9.53923e-05
Cd209a	-3.07669	1.90101e-07
Cox8b	-3.08483	0.00279974
Mybphl	-3.09912	0.00505986
Casq2	-3.19495	7.05703e-05
Myl3	-3.20843	0.00255826
Colq	-3.24417	3.78916e-06
Ckmt2	-3.30357	0.00187188
Cyp1a1	-3.3649	1.71421e-05
Myh6	-3.61407	0.00237975
Tnni3	-3.63082	0.00542478
Sln	-3.68039	0.0180399
Aplnr	-3.74512	1.20132e-06
Apln	-3.8088	2.32949e-06
Actc1	-3.82748	8.84484e-05
Ccl21a	-3.96375	0.0143711
Myl7	-4.0656	0.00598607
Myl4	-4.06771	0.00100484
Cfd	-4.09604	0.00343861
Ckm	-4.10811	0.000606627
Car3	-4.2997	0.00328643
Mb	-4.65905	0.000111613
Hbb-bt	-7.67192	0.0102082

## Sheet: STable5. Beta 3dpi
GeneID	Log2 Fold Change	FDR Value
Cxcl10	7.43769	7.37418e-08
Irf7	6.20677	7.0449e-15
Rsad2	5.98961	6.22101e-09
Saa3	5.41045	7.36716e-06
Ly6i	5.31076	1.01557e-08
Isg15	5.28128	4.02789e-08
Ccl2	5.2157	3.36459e-05
Zbp1	5.00383	2.48852e-08
Oas3	4.85769	5.70619e-10
Ifi204	4.84844	1.21039e-06
Oasl1	4.81854	2.23613e-06
Cxcl9	4.79125	6.8766e-06
Mx1	4.69564	6.30029e-08
Apod	4.68299	5.24343e-08
Ifit3b	4.64419	1.19079e-10
Ifit3	4.61412	2.32567e-11
Ccl7	4.60831	0.00154921
Ifit1	4.43226	1.82836e-10
Apol9a	4.42146	1.79958e-10
Gm12250	4.39895	4.56256e-06
Ms4a4c	4.3126	0.000333394
Oas1g	4.29663	6.49201e-08
Mnda	4.28647	7.19878e-06
Ifit2	4.26264	1.52088e-06
Oas1a	4.24648	3.91681e-07
Cfb	4.19888	2.7711e-08
Ifi205	4.1785	2.52576e-05
Ifi44	4.1063	1.61235e-07
Fcgr1	4.07682	1.59997e-05
Tgtp1	4.06758	8.93939e-07
Apol9b	4.05148	3.27205e-10
Il18bp	4.01366	8.42744e-08
Ly6c2	4.0019	3.54135e-08
Ifi27l2a	3.94905	2.62358e-08
Ccl4	3.93429	9.96859e-05
Sprr1a	3.92633	1.57359e-05
Acod1	3.908	4.90525e-06
Dhx58	3.89089	2.532e-07
Ifit1bl1	3.88255	9.03745e-07
Oasl2	3.85929	1.33454e-07
Phf11a	3.82145	4.24519e-06
Fam26f	3.79676	0.000259681
Slfn1	3.73184	1.72792e-05
Xcl1	3.71172	0.000297481
Cd274	3.70265	1.45656e-06
Gbp5	3.65354	3.81306e-05
Iigp1	3.63606	4.73945e-06
Usp18	3.62039	2.532e-07
Gbp10	3.59949	2.99203e-05
Slfn4	3.56185	0.00081628
Ubd	3.54906	0.000417234
AA467197	3.54809	0.00107578
Igtp	3.54642	1.70926e-06
Irgm1	3.50727	4.55121e-07
Phf11b	3.50194	1.00204e-05
Ms4a6d	3.47245	7.274e-06
Tgtp2	3.44658	6.8766e-06
H2-Q9	3.42014	7.0699e-05
Phf11d	3.4	4.77134e-07
Gm5431	3.39935	3.82813e-07
Gzmb	3.35855	0.00250163
Cxcl13	3.35665	9.02275e-05
Ms4a6c	3.35245	6.02482e-07
Lgals3bp	3.34284	5.21756e-11
Siglec1	3.33569	5.05857e-08
Slfn8	3.30734	6.3135e-06
Timp1	3.30556	0.000339294
Gbp6	3.30166	5.30791e-05
Tlr9	3.29854	9.05834e-05
Gm4951	3.29844	1.06413e-06
Gbp3	3.24474	6.3135e-06
Slc26a4	3.23896	9.32465e-05
Retnla	3.18038	9.67125e-05
Cmpk2	3.14905	2.85707e-05
Rtp4	3.14897	5.29492e-09
Sectm1a	3.13513	6.63037e-06
Ifi47	3.12361	6.05742e-05
Plac8	3.11274	0.000466055
Mx2	3.09695	5.89385e-07
Ms4a6b	3.07618	2.29993e-05
Trex1	3.06562	7.20382e-07
Sirpb1a	3.00366	2.65511e-06
Ccr5	2.99725	0.00200105
Gbp2	2.99439	0.00120133
AI607873	2.99255	2.85743e-06
Socs1	2.98039	0.00236566
Ddx60	2.93891	4.55121e-07
Irgm2	2.93543	2.33939e-07
Trim30a	2.93344	1.06413e-06
Pyhin1	2.92142	0.000659623
Ifnl2	2.91599	5.98487e-07
C3ar1	2.91577	0.000310728
Herc6	2.89267	6.8766e-06
Tap1	2.88576	2.41182e-07
Stat1	2.87702	3.31599e-05
Jchain	2.87631	0.00718548
H2-T23	2.85782	4.75176e-12
Lilrb4a	2.85312	1.59997e-05
H2-Q6	2.80938	1.05856e-10
Il1rn	2.80916	0.000608649
LOC100038947	2.80126	1.17136e-05
H2-Q8	2.79639	2.05767e-10
Ptafr	2.77357	9.05834e-05
BC147527	2.7732	0.00156518
Slfn9	2.7685	8.54738e-06
Bst2	2.7536	3.91681e-07
Ch25h	2.74141	4.37454e-05
Fcgr4	2.72428	0.000623164
Gm11127	2.72283	9.96859e-05
Cd180	2.70969	0.000466055
Trim30d	2.70854	2.532e-07
Xaf1	2.69892	1.09075e-07
H2-T9	2.6646	6.21787e-10
Lag3	2.64661	2.22101e-05
Clec7a	2.64613	5.52483e-05
Oas2	2.64497	5.73617e-05
H2-Q7	2.63255	1.45656e-06
Themis2	2.63182	0.000186602
B430306N03Rik	2.60073	7.29451e-06
Cxcl1	2.58184	3.7975e-05
Cxcl11	2.57903	0.000548975
Stat2	2.57893	5.15567e-06
Il1b	2.57852	0.0432261
Selp	2.57168	0.000288812
Sectm1b	2.57056	8.96924e-05
H2-Q5	2.56936	4.38485e-08
Rgs16	2.56521	8.74878e-06
Serpina3g	2.54869	0.00284065
Orm1	2.54507	6.33554e-05
Lilr4b	2.54202	0.000116108
Epsti1	2.54057	1.36355e-05
Batf2	2.53615	0.00140258
Cybb	2.53529	1.12547e-05
Sirpb1b	2.52532	1.59997e-05
Slc15a3	2.51884	9.96859e-05
Serpina3f	2.51243	0.0115748
Lgals9	2.51002	1.52088e-06
Scimp	2.50971	0.00249657
Cd72	2.50015	0.00164786
Ms4a4b	2.49617	0.00167652
Ctss	2.49102	3.89614e-06
Il6	2.4844	0.000219281
Gm6904	2.48437	1.61524e-07
Dtx3l	2.47283	8.7997e-06
H2-T22	2.46749	2.23068e-10
Psmb8	2.44707	4.24519e-06
Ifnl3	2.43994	2.532e-07
Lcn2	2.43722	3.27599e-05
Ube2l6	2.43225	9.05834e-05
Tgfbi	2.42246	0.000482993
Hsh2d	2.4219	7.19878e-06
Lrrc25	2.41495	0.00168138
Nlrc5	2.41424	0.000633044
Msr1	2.41285	0.000339294
Pla1a	2.40446	0.000130488
H2-K1	2.39294	8.39691e-13
H2-Q4	2.37387	2.66393e-11
Slamf8	2.37284	0.0297845
Fosl1	2.3721	1.74192e-05
Mlkl	2.37124	0.000425676
Slfn2	2.37054	0.000121188
E130102H24Rik	2.36185	0.01777
Mpeg1	2.35984	1.52088e-06
Gm12185	2.35937	0.000263722
Ido1	2.35312	0.00626888
Gpr141	2.34494	0.000307941
Hspa1a	2.33781	0.0111275
Il2rb	2.33562	0.00169068
Aif1	2.33278	0.00500689
Fgr	2.33164	0.0010687
Ifih1	2.32757	6.3135e-06
Ccl3	2.3239	0.00647013
Gm4841	2.3018	0.00147214
Eif2ak2	2.29481	3.63329e-05
Sele	2.28208	2.25365e-05
Slamf9	2.28173	0.000111825
Runx3	2.2784	3.93082e-05
Plau	2.27768	0.000909932
Daxx	2.27652	6.00699e-05
Cd68	2.27147	1.55941e-06
Clec4e	2.26953	0.00120133
Plekha4	2.24494	6.47032e-06
Oas1b	2.24156	3.65537e-05
Lst1	2.2396	0.00243522
Parp14	2.23334	0.000157919
Il4i1	2.23297	0.034737
Tlr2	2.22605	5.4198e-05
Casp4	2.20852	0.000310728
Gm4070	2.18722	0.000761875
Ms4a7	2.17636	0.00250163
BC094916	2.17471	0.000400242
Pik3ap1	2.16521	0.00159839
Clec4a3	2.16326	2.11776e-05
B2m	2.15009	9.0814e-11
Socs3	2.14707	0.000586852
Slamf7	2.14364	0.00194035
Ifitm3	2.14012	7.90286e-06
Parp12	2.1382	2.06388e-05
Gm21188	2.13772	0.00214008
Prf1	2.13338	0.00827832
Ddx58	2.13015	2.52576e-05
Tnf	2.12599	1.61675e-05
Slc39a2	2.11957	7.87729e-06
Efcab3	2.11756	0.000164035
Pld4	2.10495	3.81306e-05
Gpnmb	2.1035	0.00611042
Saa1	2.10005	0.000983549
Tbx21	2.09778	0.000143738
Parp9	2.09508	1.59997e-05
Znfx1	2.09335	2.29993e-05
H2-Q1	2.08803	1.54889e-09
Sp140	2.08474	1.15251e-05
Tlr13	2.07757	0.000106626
Pydc4	2.07701	0.000937835
Serpina3n	2.0734	0.000290485
Cyp4f18	2.06669	4.73279e-05
Lpxn	2.06173	0.000464816
Ifi27l2b	2.0612	7.39858e-05
Ifnb1	2.05899	0.000310422
Olfr56	2.05714	0.000417048
Pim1	2.05386	0.000640448
Misp	2.05307	0.000275748
C2	2.05106	4.54982e-05
Lcp2	2.05028	0.00185764
I830077J02Rik	2.04754	0.00197726
H2-D1	2.04315	2.66393e-11
Sema4d	2.03996	0.000369752
Psmb9	2.03504	0.000106626
H2-L	2.01572	1.66335e-07
Ear3	2.00389	0.00959076
Ccl5	2.00258	0.00295063
Gbp7	1.99812	0.00103787
Sp100	1.99242	9.67125e-05
Spi1	1.98915	0.000164035
Trim21	1.9884	1.36355e-05
Hcls1	1.98234	0.000488488
Fcer1g	1.98046	0.000510663
Clec12a	1.98008	0.0168812
Thbs1	1.97387	0.0038781
Gzma	1.97384	0.00834381
Serpina3m	1.96551	0.0266172
Gpr18	1.96241	0.00443734
Hspa1b	1.96226	0.0310605
Snx20	1.96179	0.0023789
Cst7	1.95724	0.00365237
Gm5150	1.95455	0.000793761
Pirb	1.95364	0.00331301
Tnfrsf1b	1.93998	0.00040866
Cd300lf	1.93678	0.000808533
Pira2	1.92798	0.000352364
Itgb2	1.92778	0.000275722
Gbp4	1.92341	0.0424181
Orm2	1.91967	9.76849e-05
Nkg7	1.91546	0.0179972
Gm5424	1.9057	0.0081319
Tmem106a	1.90357	0.00157564
Zc3h12a	1.90139	1.74192e-05
Atf3	1.88635	0.000818676
Csf2rb	1.88366	0.000309792
H2-T-ps	1.88115	1.71923e-07
Car13	1.87963	0.000267753
Clec4n	1.87549	0.000697502
Dck	1.87111	0.00057578
Nfkbie	1.86961	3.06505e-05
Sp110	1.86598	0.00126136
Clec4a1	1.86566	0.0118744
AW011738	1.86243	0.000623164
Plekho2	1.86227	0.000461753
Trafd1	1.86221	0.000129011
Cxcl3	1.85957	0.0024097
Slc28a2	1.85376	0.02174
Gbp9	1.85272	0.0264441
Uba7	1.84729	0.00774533
Parp10	1.8472	0.000445931
Il21r	1.84295	0.0169902
Bex6	1.84256	2.14118e-06
Cd53	1.84103	0.000456734
9930111J21Rik2	1.83971	3.1791e-05
Ly6e	1.83797	1.19079e-10
Gbp8	1.83047	0.0253118
Irf5	1.82638	0.00262048
Dusp5	1.82378	8.37885e-07
Xdh	1.82029	0.000437039
Slc7a8	1.8192	0.00617555
Mir6972	1.81661	0.00341003
Slc7a5	1.81285	1.06576e-07
Cd300ld	1.81071	0.000438516
Myo1f	1.80893	0.00820088
Adar	1.80584	2.69188e-06
Cyth4	1.80515	0.00119538
A530064D06Rik	1.79487	9.01541e-05
Ncf4	1.79177	0.00495825
Mthfd2	1.79061	0.000145071
Irf9	1.78486	4.02789e-08
Pydc3	1.78433	0.0456736
Ctsw	1.78244	0.0247455
Dnase1l3	1.78124	0.00402186
Cd300e	1.78114	0.000359925
Sell	1.78089	0.0327639
Csf2rb2	1.77989	0.000836155
Slc11a1	1.77881	0.00741484
Tnip3	1.77849	0.000949803
Isg20	1.77737	0.00101249
Ly9	1.77621	7.0699e-05
Ncr1	1.77391	0.0107007
Serpina3i	1.7724	0.00380229
H2-T24	1.77235	0.0149896
Hsd11b2	1.76637	0.00131881
Sh3bp2	1.76349	0.000297481
Cd300a	1.76114	0.000281929
Pilra	1.75968	0.0110815
Hmga1-rs1	1.75608	0.00174121
Apol10b	1.7459	0.0186073
Il27	1.7458	0.00386356
Rasa4	1.7456	5.76378e-05
Tnfrsf12a	1.74402	0.000607857
C1rb	1.73734	1.78129e-06
Ackr1	1.73444	0.0355502
Plek	1.73332	0.000702955
Ptpn6	1.73165	0.00467583
9930111J21Rik1	1.72421	0.0112424
Il10ra	1.72388	0.00126136
Was	1.72114	0.000793761
Sdc3	1.71896	0.000369752
Cd69	1.71791	0.0096113
Gzmc	1.71093	0.0128262
Mndal	1.70486	0.0145896
Gm6548	1.70366	0.000412137
AW112010	1.70051	0.0102066
Gbp11	1.69943	0.00194035
Pira6	1.69548	0.000385386
Mitd1	1.69017	3.23384e-05
Tnfrsf9	1.69011	0.00542896
Ly6a	1.68962	6.32959e-08
Cd300ld3	1.68876	0.00173792
P2ry13	1.68552	0.00345699
Itgax	1.68379	0.00289845
Ms4a4a	1.68129	0.00193161
B4galt5	1.67644	3.79494e-05
Hck	1.67638	0.000820186
Apobec3	1.67635	0.000425676
Gpr31b	1.67303	0.0045576
Serpine1	1.67271	8.75497e-05
Gpr84	1.67171	0.0128158
Igsf6	1.66919	0.00795285
Havcr2	1.66836	0.000493816
Cd52	1.66291	0.0177518
Lypd8	1.66204	0.0206138
Ifi203	1.65844	0.00845973
H2-T10	1.65678	5.32743e-06
Tyrobp	1.65517	0.00101249
Ly86	1.65045	0.00320296
Nt5c3	1.65024	0.000623164
Pstpip1	1.6482	0.0062482
Helz2	1.64731	0.00334037
Hap1	1.64525	0.000164035
Lacc1	1.64492	0.00782997
F830016B08Rik	1.64378	0.00151989
Naip2	1.63968	0.000247152
Slc2a6	1.63964	0.00147214
Klra2	1.63447	0.00259413
Gins2	1.63428	0.00457832
Irf1	1.62792	0.00834204
Ocstamp	1.62607	0.00334699
Cd200r4	1.62587	0.000450056
Evi2a	1.62535	0.0051397
Gm7609	1.62299	0.000309792
Ifi35	1.61867	0.000573785
Tnfaip8l2	1.61637	0.00456885
C1qb	1.61559	0.00286663
Selplg	1.61508	0.00198124
Cd86	1.61084	0.00823753
Cd300c2	1.60178	0.00117295
Tmem173	1.5963	0.0106084
Apol6	1.5962	0.012713
Mcm5	1.59324	0.0023888
Speer4c	1.59046	0.00126136
Csf1	1.59041	0.00034172
Ppa1	1.58995	0.00471319
H2-M3	1.58879	6.40017e-05
Cdt1	1.58848	8.53865e-05
Cd80	1.58755	8.68526e-05
Tor3a	1.58522	9.48677e-07
Lrg1	1.5793	1.59997e-05
Rbm3	1.57929	0.000834517
Trim34a	1.57907	0.000485064
Apobec1	1.5786	0.000275722
Bcl3	1.57586	0.000958192
Cd48	1.57172	0.00483292
F10	1.5669	0.0256226
Lif	1.56588	0.00357696
Vav1	1.56159	0.00527049
Slfn3	1.55751	0.00437787
Pml	1.55573	0.000742605
Casp1	1.55265	0.0138202
Hpse	1.55256	0.000591202
Tap2	1.54766	8.07321e-05
Hbegf	1.53932	0.000263013
Ptprc	1.53854	0.00795285
Alpl	1.5345	0.00115853
Sesn2	1.53435	0.000473196
Spn	1.53308	0.0046098
Adgre1	1.53224	0.00655929
Arhgap30	1.53117	0.00494363
Itgam	1.52943	0.0142154
Psmb10	1.52336	0.018176
Klrk1	1.52155	0.00621634
Apbb1ip	1.52107	9.98104e-05
Bcl2a1b	1.51965	0.0243379
2810417H13Rik	1.51724	0.00935077
Ogfr	1.51545	5.17306e-05
Trim14	1.51396	0.000477799
C4b	1.51358	8.72078e-05
Snai1	1.5128	0.000123101
C1ra	1.51218	1.06413e-06
Tnfsf8	1.51217	5.55695e-06
Tigit	1.51002	0.027714
Dbp	1.50175	0.0147692
Card11	1.50034	0.0163285
Hsph1	-1.50506	0.000209955
Mir6935	-1.51059	0.0103279
Mir7091	-1.51346	0.0267137
Csdc2	-1.5143	0.00926357
Slc7a10	-1.51518	0.0235483
Xlr3a	-1.52964	0.00164149
Rab26os	-1.52978	0.000680079
Mir6516	-1.53773	0.00715262
Mia	-1.54148	0.00257395
Ces1e	-1.56191	0.0103465
Zg16	-1.57496	0.0319094
Asgr1	-1.58857	0.00823753
Try5	-1.60827	0.0409566
Cela3b	-1.62051	0.0413583
Hist1h4d	-1.63817	0.000145749
Cpa1	-1.66718	0.0383512
Snora78	-1.67404	0.0011388
Errfi1	-1.69186	0.012102
Amy2a5	-1.70156	0.0434595
Adamts17	-1.70435	6.53397e-06
Scgb1c1	-1.707	0.0247455
Cd209a	-1.7113	0.0102205
Carmn	-1.7114	0.00208443
Igfbp3	-1.71585	0.0264201
Hist1h1d	-1.71716	1.66898e-06
Hist1h4h	-1.72934	0.000280441
Arl4d	-1.8319	0.0386084
Gsta2	-1.84051	0.017872
Rasd1	-1.84921	0.015988
Lypd2	-1.87728	0.0391717
Dusp1	-1.88134	0.00517906
Scgb3a2	-1.8932	0.0321431
Fabp1	-1.95676	0.00566879
Pnliprp1	-1.96365	0.0121214
8430408G22Rik	-1.98108	0.0120017
Pnlip	-1.99382	0.0142891
Try4	-2.03089	0.0153402
1810011O10Rik	-2.04908	1.70926e-06
Cox7a1	-2.07375	0.046474
Ces1g	-2.18793	0.00102505
Npr3	-2.25835	0.00564365
Ces1f	-2.33345	0.00955904
Cela2a	-2.37911	0.00905548
Hist1h1e	-2.40619	5.30907e-06
Ctrb1	-2.41705	0.0200978
Eln	-2.44241	0.00131021
Cyp1a1	-3.18287	9.77836e-05

## Sheet: STable6. Beta 6dpi
GeneID	Log2 Fold Change	FDR Value
Cxcl2	9.17707	5.1783e-12
Il1r2	8.91084	2.7549e-10
Acod1	8.59378	4.68551e-14
Cxcl10	8.59326	5.92547e-10
Il1b	7.65216	1.08642e-08
Cxcl3	7.34595	1.68332e-16
Saa3	7.2616	5.90151e-09
Gm5483	7.08933	1.96489e-11
Retnlg	7.00815	1.05699e-08
Stfa2l1	6.76915	2.88242e-09
Prss22	6.75686	6.74644e-16
S100a8	6.7351	2.49484e-07
Ccl2	6.70023	6.75378e-08
Ccl3	6.6883	2.35851e-11
Cxcl1	6.67636	4.1036e-15
AA467197	6.58224	1.02969e-08
Ccl4	6.5118	2.0789e-09
Clec4e	6.48515	1.21968e-13
Csf3	6.38542	1.72677e-16
S100a9	6.29909	6.83478e-07
Cxcl9	6.18257	8.86883e-09
Clec4d	6.17915	1.21968e-13
Ngp	6.08817	1.50185e-06
Ccl20	6.08544	8.95999e-17
Lcn2	6.04621	4.50432e-14
Asprv1	6.01257	4.28135e-07
Tarm1	5.92949	4.59085e-11
Orm1	5.9272	1.40133e-13
Wfdc17	5.90267	1.08642e-08
Trem1	5.76657	7.29432e-14
Rsad2	5.74617	1.51762e-09
Il6	5.67479	4.71474e-13
Il1rn	5.54314	4.35095e-10
Slfn4	5.38186	1.60469e-07
Mt2	5.36996	8.21068e-09
Gm7030	5.35826	0.000571618
Cxcl5	5.34137	2.82311e-10
Lilr4b	5.3253	5.93628e-12
Ccl7	5.25235	2.91397e-05
Ifitm6	5.2295	9.97688e-06
Fcgr4	5.18748	1.60302e-09
Ccr1	5.13529	3.39712e-09
Ifi204	5.0869	5.45925e-08
Ly6i	5.05568	2.71419e-09
Irf7	5.03712	1.21968e-13
Zbp1	4.9943	2.28281e-09
Mmp8	4.99303	4.45192e-09
Fpr2	4.97994	2.63979e-11
Cxcr2	4.95711	5.92547e-10
Il1a	4.92512	5.92524e-14
Cd274	4.91854	6.8333e-10
Tnf	4.91501	4.1036e-15
Il4i1	4.90642	4.07111e-07
Gm12250	4.89052	7.47666e-08
Zc3h12a	4.82192	2.0625e-15
Lilrb4a	4.77029	9.42418e-11
Ptx3	4.75226	1.23256e-09
Slc26a4	4.73218	1.14563e-08
Arg2	4.72581	1.69909e-10
Oasl1	4.71071	3.64812e-07
Cd14	4.70933	1.85999e-13
Isg15	4.68566	3.28976e-08
Serpina3f	4.6717	3.83229e-07
Gzmb	4.63527	5.38497e-06
Selp	4.62136	8.28869e-10
Socs3	4.58242	1.26257e-10
Lrrc25	4.58223	8.34956e-09
Gpr84	4.57881	9.57163e-11
Mirt2	4.57446	9.56974e-11
Stfa1	4.57393	7.12304e-11
Cd300lf	4.56335	7.10824e-12
Nlrp3	4.53314	4.1036e-15
Ifit2	4.52981	5.46734e-08
Trem3	4.52492	4.94623e-09
Gbp5	4.52074	1.3112e-07
Ifi205	4.51384	8.2849e-07
Ptafr	4.50882	1.20731e-09
Mrgpra2b	4.46746	2.18496e-14
Irgm1	4.46532	4.24182e-10
Wfdc21	4.4298	3.68218e-09
Slfn1	4.42713	1.09128e-07
Ly6g	4.42393	1.21023e-08
Hcar2	4.4183	2.73396e-11
Ifit1	4.41667	2.73396e-11
Mnda	4.39016	5.45659e-07
Timp1	4.3819	5.96276e-07
Tgtp1	4.36997	2.43381e-08
Slc7a11	4.36748	3.31822e-18
Fosl1	4.34408	2.94208e-12
Slc15a3	4.32837	7.19308e-10
Iigp1	4.32076	2.15229e-08
Ifit3	4.3025	9.99106e-12
Gbp2	4.28294	1.08052e-06
Ubd	4.27526	2.72068e-06
Tlr2	4.27432	2.20918e-11
Ch25h	4.2616	1.76297e-09
Cldn4	4.25272	3.10833e-08
Mt1	4.25145	8.38138e-08
Fpr1	4.19063	1.52079e-11
Oas3	4.17491	2.53054e-09
Slfn2	4.17454	6.33995e-10
Igtp	4.17151	9.34405e-09
Tnfrsf9	4.15478	1.00093e-10
Trex1	4.12069	2.06009e-10
Tlr13	4.11779	1.37049e-11
Fam26f	4.09773	9.68077e-06
Tnfaip2	4.09405	2.77718e-12
Stfa2	4.09293	1.39744e-08
Saa1	4.07497	6.33995e-10
Ackr1	4.07352	8.19563e-08
Socs1	4.07193	4.2729e-06
Ifi47	4.03478	1.02277e-07
Bcl2a1b	4.01401	7.99007e-09
Rab20	4.01256	2.69369e-11
Ms4a6d	4.00127	6.75378e-08
Pim1	3.98429	1.05705e-09
Il18rap	3.95098	1.55549e-10
Serpina3g	3.94983	1.03586e-06
Chil3	3.94661	8.34956e-09
Osm	3.94461	1.57005e-09
Ifng	3.93988	3.19732e-06
Mrgpra2a	3.93484	9.56156e-15
Srgn	3.90415	6.96025e-10
Tnfaip3	3.9011	2.02235e-12
Mmp9	3.89594	8.06291e-07
Plek	3.89364	4.33074e-11
Ifit3b	3.87868	7.29731e-10
H2-Q10	3.83909	1.99196e-09
C5ar1	3.81812	7.12304e-11
Gbp6	3.80414	6.38737e-07
Mx1	3.79169	4.74747e-07
Samsn1	3.77956	1.1781e-10
Gm5416	3.75485	4.55776e-14
Sprr1a	3.75369	3.66015e-06
Arg1	3.74552	4.98643e-05
Pla2g7	3.7447	4.30988e-08
Themis2	3.73703	6.66449e-08
Mab21l3	3.73374	1.65642e-18
Tigit	3.69964	1.40317e-08
Cxcl13	3.68341	2.54173e-06
Sectm1b	3.67873	1.15674e-08
Il1f9	3.67177	1.30801e-09
Gbp10	3.66327	2.70909e-06
Cd53	3.66156	3.09609e-10
Fcgr1	3.65676	1.01184e-05
Serpina3m	3.65458	2.79716e-06
Nfkbiz	3.64607	7.51926e-15
Ctla4	3.63393	1.28564e-08
Ly6c2	3.61872	2.15229e-08
Rgs16	3.61868	8.47289e-10
Tgtp2	3.61482	3.39063e-07
Map3k8	3.60681	6.93775e-09
Plaur	3.60253	6.01045e-13
Igsf6	3.59749	8.69412e-09
Slc11a1	3.58603	3.33864e-08
Ms4a4a	3.58044	6.06991e-10
Soat2	3.57953	4.59085e-11
Mxd1	3.5569	1.11531e-10
Rnf149	3.55273	1.44952e-11
Cd177	3.54891	2.20348e-08
Snx20	3.54519	3.38668e-08
Adamts4	3.54365	6.65277e-12
Tnfsf14	3.52988	1.19053e-10
Ms4a6c	3.5141	2.61475e-08
Slpi	3.51113	6.02083e-08
Csf3r	3.50827	7.22363e-08
Clec5a	3.50246	2.4839e-10
Bcl2a1d	3.47375	1.26397e-07
Tap1	3.46906	6.1904e-10
Msr1	3.46904	7.47666e-08
Aoah	3.45066	5.09359e-07
Il18bp	3.44997	1.45684e-07
BC100530	3.44772	2.15229e-08
Cd33	3.44223	5.93628e-12
Ccl11	3.44058	1.84685e-06
Serpine1	3.43778	8.34445e-12
Orm2	3.42658	1.20783e-10
Casp4	3.41796	2.61989e-08
Rnf19b	3.41467	1.5095e-09
AI607873	3.40921	2.66589e-08
Rtp4	3.40866	1.00093e-10
Ear6	3.4052	6.25203e-06
Tnfrsf1b	3.40147	3.32761e-09
Fkbp5	3.39968	2.91397e-05
Tmem37	3.38715	1.2812e-08
Tifa	3.3846	1.37756e-08
Aldh1a3	3.38355	3.63107e-13
Fcgr3	3.38085	3.16888e-08
Hmga1-rs1	3.37872	5.34152e-09
Lcp2	3.37007	1.24338e-07
Fcer1g	3.36294	1.04555e-08
I830077J02Rik	3.35593	1.0361e-07
Pla1a	3.34369	4.36805e-08
Camp	3.33505	0.000368709
Ccrl2	3.33491	2.60122e-10
Gda	3.32711	1.49241e-11
Atf3	3.32541	1.01109e-08
Gbp3	3.32142	4.63456e-07
Batf2	3.31547	4.41179e-06
Apol9a	3.31449	1.90997e-08
Il1bos	3.31362	2.21548e-11
Tnip3	3.30378	1.99196e-09
Pdcd1	3.30241	7.59997e-07
Cyp4f18	3.3011	9.29937e-10
Tnfrsf12a	3.30104	1.37297e-09
Adora3	3.29764	2.08472e-09
Ereg	3.28287	5.90655e-10
F3	3.28077	1.04779e-11
Bcl2a1a	3.25593	4.4697e-07
Tgfbi	3.22953	8.25213e-07
Marcksl1	3.22817	2.81291e-08
Tgm1	3.22742	8.34445e-12
Lrg1	3.21958	5.77712e-13
Nfil3	3.20747	4.86007e-09
Fcgr2b	3.20633	7.87062e-07
Sfn	3.20438	3.71592e-09
Slfn8	3.20248	1.44454e-06
Ccl5	3.20245	6.22721e-07
Pirb	3.20157	4.40345e-07
Gm4841	3.1992	1.44431e-06
Oas1g	3.19438	2.23997e-06
Cfb	3.18865	4.43065e-07
Mefv	3.1806	1.39641e-09
Siglece	3.17172	1.07953e-08
Cxcl11	3.16676	3.16192e-06
Csf2rb	3.1614	4.04851e-09
Sphk1	3.15026	2.23913e-07
Pstpip1	3.14976	7.50423e-08
Ninj1	3.14091	7.043e-09
Clec7a	3.13365	3.86358e-07
Slc2a6	3.12938	2.41296e-09
Psors1c2	3.12818	1.39339e-08
Mir7678	3.12698	8.33053e-08
Bcl3	3.12037	1.18939e-09
Rbm3	3.11714	9.87204e-10
Gzmk	3.10357	2.91397e-05
Lif	3.10278	6.64527e-09
Spi1	3.09464	9.56266e-09
Emilin2	3.08711	4.16141e-09
Rnd1	3.08571	4.16815e-08
Sirpb1b	3.08285	4.87837e-08
Ccl9	3.08187	6.88137e-09
Dhx58	3.08096	1.69264e-06
Dusp2	3.08047	1.65732e-06
4833419F23Rik	3.0568	2.67364e-09
AB124611	3.05239	9.41321e-07
AW112010	3.04421	9.35463e-07
F10	3.04278	1.11778e-06
Rdh12	3.03579	3.3268e-09
Gpr141	3.03546	5.33909e-07
Glrx	3.02656	2.04095e-08
Upp1	3.01998	2.91397e-05
Apod	3.01863	1.10407e-05
Tyrobp	3.01365	8.02183e-09
Psca	3.01238	5.34461e-08
Alox5ap	3.01208	8.18986e-10
Tlr6	3.00951	4.0705e-11
Gm4832	3.00546	3.18886e-13
Il10	3.00247	5.31101e-08
Orm3	2.99571	3.50987e-06
Pik3ap1	2.99439	2.31337e-06
Ctss	2.99328	1.25072e-08
Ms4a4c	2.99303	0.00102358
Batf	2.98844	7.57541e-08
Fgr	2.98299	4.45329e-06
Thbs1	2.98216	2.39162e-06
Tacstd2	2.97727	1.61569e-10
Arid5a	2.97713	3.84206e-12
Nfkbid	2.9563	1.31583e-09
Gm15056	2.95353	0.000284146
Nfkbie	2.93302	4.78672e-10
Duoxa2	2.93215	1.15357e-08
Apoc2	2.93123	9.49404e-06
Akr1b8	2.92581	7.03927e-09
Plat	2.91997	1.46939e-06
Icos	2.91696	1.9313e-06
Ccr5	2.91612	0.000160351
Plac8	2.91502	4.4869e-05
Hcst	2.91356	9.91426e-08
Gm3776	2.90948	3.38573e-05
LOC100038947	2.90474	7.55373e-07
Oas1a	2.90393	1.88496e-05
Mir22hg	2.89276	1.29174e-05
Ifi27l2a	2.89077	7.31796e-07
Gm11127	2.86811	5.86788e-06
P2ry13	2.85671	1.56429e-07
Klhl6	2.85607	7.577e-09
Malt1	2.83619	8.39896e-09
Serpinb9b	2.82856	5.45345e-08
Sdcbp2	2.82517	3.28778e-09
Btg1	2.81767	7.89909e-10
E230013L22Rik	2.80858	9.97299e-11
Apol9b	2.80825	1.51612e-07
Ido1	2.80564	4.81377e-05
Dusp5	2.80266	5.93628e-12
Csf2rb2	2.802	5.75785e-08
Steap4	2.80175	1.08586e-09
Plk3	2.80142	4.57144e-11
Mir27a	2.80077	2.56424e-05
Cd69	2.79954	2.71489e-06
Sla	2.79909	9.75867e-09
Slc7a5	2.79424	3.1879e-13
Mir147	2.79352	6.09498e-06
Irf1	2.79283	1.18865e-06
Hcls1	2.77771	3.4361e-07
Ccl12	2.77722	0.00313006
Il4ra	2.77544	1.08495e-07
Lmnb1	2.77529	6.33995e-10
Gm17757	2.76774	2.92469e-07
Trem2	2.76198	4.66059e-05
Bhlhe40	2.7475	2.55328e-11
Slc6a14	2.7445	1.76032e-07
Ptpn22	2.74393	6.10283e-08
Ncf4	2.74045	2.71489e-06
2010005H15Rik	2.73477	3.18249e-07
Ctse	2.73229	1.38254e-08
Xaf1	2.72045	9.56266e-09
Has1	2.71149	2.3091e-07
Sbno2	2.70944	2.01175e-09
Car13	2.70843	5.44761e-08
B430306N03Rik	2.7059	4.78061e-07
Cirbp	2.70276	1.14159e-06
Sele	2.69901	1.31001e-07
Serpina3i	2.69781	1.40159e-06
Gadd45b	2.68958	3.63096e-11
Myc	2.68644	1.84597e-11
Litaf	2.68433	1.03716e-09
Rhov	2.68411	5.25597e-07
Ptges	2.67494	1.76028e-06
Gpr35	2.67456	2.90914e-08
Ebi3	2.67306	1.46052e-07
Spp1	2.67123	1.78503e-05
H2-Q4	2.66806	1.21968e-13
Ugt1a7c	2.66156	1.15526e-08
Lpxn	2.6598	1.12903e-06
Snx10	2.65958	1.69831e-08
U90926	2.65957	2.27385e-14
Mir23a	2.65888	2.91397e-05
C3ar1	2.65312	5.49777e-05
Smpdl3b	2.64443	1.03843e-06
Irak3	2.64018	1.60008e-09
Birc3	2.63653	7.79756e-12
Mcemp1	2.63509	1.5095e-09
Anxa1	2.63405	5.45925e-08
Fth1	2.63356	4.13025e-09
Serpina3n	2.62919	8.72145e-07
Gpr132	2.62864	2.29789e-06
Amica1	2.62594	7.42229e-09
Nfkbia	2.62442	5.46734e-08
Ivl	2.623	0.00048668
Egln3	2.61774	8.61206e-09
Tnfsf9	2.61766	6.8333e-10
Sod2	2.60254	1.93719e-08
Zfp52	2.59623	6.08756e-11
Trim30b	2.59421	3.45527e-06
Fst	2.58345	4.26126e-06
Glipr2	2.58218	4.44301e-08
Gsta1	2.582	0.00017458
S100a14	2.57988	2.91397e-05
H2-T9	2.57751	1.97103e-10
Cdkn1a	2.57663	4.47414e-05
Il17ra	2.5715	4.24182e-10
Rgcc	2.57098	3.78618e-05
Hif1a	2.57075	1.55186e-10
Mir6953	2.56466	3.09265e-05
Itgam	2.56363	3.65289e-06
Dgat2	2.5609	1.83889e-07
Fkbp1b	2.5607	4.04423e-08
Mx2	2.55809	2.71489e-06
Ltb4r1	2.55617	8.85659e-05
Pyhin1	2.55573	0.000173308
H2-Q7	2.54923	2.74902e-07
Il27	2.54898	3.44141e-06
Tnip1	2.54299	5.90151e-09
Rhof	2.53824	1.65125e-08
Rhou	2.53624	1.60001e-11
Tmem252	2.53258	2.91397e-05
Rtn4rl2	2.53032	4.74625e-07
Olfm4	2.52668	1.97393e-10
Junb	2.52663	1.47669e-08
Adam8	2.52448	6.94129e-07
Grina	2.52392	3.63096e-11
Trafd1	2.52389	9.68434e-08
Apold1	2.52377	9.56151e-06
Noct	2.52041	2.67331e-11
Smox	2.516	3.47715e-11
Gm9733	2.51458	0.000202855
Rab32	2.51423	1.26184e-06
Spata13	2.51404	1.94051e-10
Cd80	2.51007	1.60302e-09
Myd88	2.50755	1.86929e-08
Chil4	2.5069	0.000521032
Id2	2.49812	9.55211e-08
Csrnp1	2.49263	2.10219e-05
Pmaip1	2.48822	1.44885e-05
Il10ra	2.48538	6.48606e-07
Prdx5	2.48143	2.54969e-06
Ltf	2.47801	0.00651487
Cybb	2.47625	1.9236e-06
Cd52	2.4727	2.91397e-05
Snora21	2.47206	1.11227e-05
Fas	2.46742	1.08299e-05
Gpnmb	2.46677	5.87767e-05
Rac2	2.46323	2.14646e-06
Retnla	2.45279	0.000113167
Fosl2	2.44749	4.91116e-08
Gm5431	2.44471	1.68159e-05
Trim15	2.4426	6.11674e-09
Gm13363	2.43739	0.0124777
Gm21188	2.43736	2.91397e-05
Sema4d	2.42774	3.28292e-06
Pglyrp1	2.42595	2.91397e-05
Rasl10b	2.42123	2.91397e-05
Cd44	2.41854	6.17449e-10
Usp18	2.41773	2.01175e-05
Cd47	2.40951	7.02844e-10
Plscr1	2.40828	1.052e-08
Tfpi2	2.40748	1.68308e-06
Gpr65	2.40591	4.5874e-06
Cyth4	2.40588	2.71209e-06
C1qb	2.40547	1.75678e-06
Ncf2	2.40004	1.77444e-08
Txnrd1	2.39837	1.09075e-09
H2-T23	2.39365	2.73396e-11
Ctps	2.39157	6.15498e-10
Entpd3	2.38574	8.32945e-07
Hmox1	2.38267	1.9959e-10
Ly6c1	2.37963	3.32052e-07
H2-D1	2.37952	5.92524e-14
Sema6b	2.37728	4.83107e-09
Lpcat2	2.37719	5.34461e-08
H2-Q6	2.37579	6.11707e-10
Kcne4	2.37472	3.03711e-06
Tnfrsf4	2.37127	4.8368e-06
Nampt	2.37125	2.66195e-08
Tiparp	2.37075	4.84618e-09
Slc39a2	2.36914	1.28806e-07
Il23a	2.36735	1.17883e-11
Gm4951	2.3672	2.91397e-05
Phf11d	2.36704	1.83802e-05
Ms4a8a	2.36589	1.24269e-08
Sirpb1a	2.36032	1.99816e-05
Mir142	2.35585	0.000136563
Daxx	2.35286	4.23641e-06
A530032D15Rik	2.35055	4.81676e-07
Nlrp12	2.34944	1.56429e-07
Stx11	2.34932	5.44335e-10
Gjb4	2.34767	4.32446e-08
Psmb8	2.34618	8.74995e-07
Scimp	2.34475	0.000336006
Irf5	2.34199	1.41224e-05
Adm2	2.34136	1.12867e-12
Sectm1a	2.34066	3.08152e-05
Bst1	2.33977	9.71875e-09
Clec4n	2.3377	3.61571e-06
Trib1	2.33571	1.03716e-09
Mir6972	2.33556	2.05844e-05
Pak6	2.33522	5.9214e-06
Syt12	2.33395	2.95928e-09
H2-K1	2.3302	1.21968e-13
Pik3r5	2.32774	3.56929e-06
Ccdc86	2.32735	1.81501e-08
Plekho2	2.32551	2.05474e-06
Itgb2l	2.3214	2.70061e-07
Selplg	2.32015	1.7198e-06
Phf11a	2.31594	0.000340612
Tmem243	2.31042	2.39273e-09
Rpl26	2.30994	0.019661
Klf10	2.30923	5.90753e-08
H2-Q8	2.30293	2.1753e-09
Doc2b	2.29865	0.00451548
Hk2	2.29396	9.20794e-10
Lag3	2.2934	2.71912e-05
Cdkn2d	2.29301	1.21023e-08
Oas2	2.29235	2.91397e-05
Ube2d3	2.29042	1.7722e-07
Hdc	2.28686	3.14243e-08
Parp9	2.28645	4.04615e-07
Gsr	2.28119	1.57105e-09
Sdc4	2.27886	8.6931e-09
Insl6	2.27752	1.5932e-05
Fxyd5	2.2768	6.68872e-09
Pira2	2.27564	3.5442e-06
Nipal1	2.26869	6.87993e-10
Cd300ld	2.26867	1.72514e-06
Msrb1	2.26688	1.40411e-08
Sp140	2.26606	3.12359e-07
Maff	2.26572	9.58076e-10
Klra2	2.26172	4.04244e-06
Mybph	2.25608	5.59331e-08
Abtb2	2.25383	9.75867e-09
Sgms2	2.25268	3.41489e-10
Olfr56	2.25168	1.40812e-05
Clec4a1	2.24511	0.000119763
Cd68	2.24151	2.21334e-07
Oasl2	2.23652	3.04181e-05
Trim30a	2.23557	1.04277e-05
Havcr2	2.23294	6.34693e-07
Clec4a2	2.23143	6.33105e-08
Slc16a3	2.23038	8.39174e-07
Phf11b	2.22953	0.000206561
Fgf23	2.22734	2.43025e-09
Mpeg1	2.22011	4.87202e-07
Evi2a	2.21782	1.4705e-05
Fcrlb	2.2164	5.95772e-06
Pira6	2.2116	7.20001e-07
Pfkfb3	2.2116	4.00775e-08
Nlrc5	2.20933	0.000102822
Fgl2	2.20403	2.91397e-05
Coro1a	2.20322	2.33082e-05
Ms4a6b	2.2019	0.000107888
H2-Q9	2.20147	0.000698292
Cd164l2	2.20109	1.03742e-09
Milr1	2.20068	2.61989e-08
Il2rb	2.20062	0.000199195
Gm19705	2.19962	2.12613e-07
Mapk13	2.19956	2.26653e-07
Ackr3	2.19842	2.91397e-05
Snhg3	2.19803	1.33581e-05
Fgg	2.19316	1.37819e-06
Tagap	2.19056	1.65912e-05
Pmvk	2.18952	2.91397e-05
H2-Q1	2.18886	7.17476e-11
Gm15133	2.18752	8.86883e-09
Ppa1	2.18606	1.30143e-05
Metrnl	2.18426	3.66484e-06
Gm9855	2.18158	0.00270932
Marco	2.17642	0.000191568
Cd86	2.17293	2.91397e-05
Tubb6	2.16966	1.68655e-05
Cd3d	2.16729	0.000696942
Rab8b	2.16379	3.68218e-09
Gdf15	2.15596	1.7722e-07
Fam49b	2.15402	2.77494e-07
Rgs1	2.15306	2.91397e-05
Hck	2.15278	2.94276e-06
P2ry2	2.1513	6.29252e-10
Tnfrsf26	2.1493	1.14585e-09
Sat1	2.14759	1.2812e-08
Ccdc88b	2.14673	0.000157467
Ptpn2	2.14367	1.2721e-09
Gch1	2.14051	2.34884e-08
B2m	2.13603	1.23361e-11
Chmp4b	2.13493	7.12304e-11
Efhd2	2.13333	3.29719e-08
Tgif1	2.13207	1.49241e-11
Parp10	2.13081	6.97463e-06
F13a1	2.1284	4.28251e-06
Arrdc4	2.12732	2.91397e-05
Plin2	2.12692	1.41398e-07
Itpkc	2.12595	9.56974e-11
Lgals3bp	2.12373	8.36871e-08
Nr4a3	2.1215	2.85456e-14
Icam1	2.12149	7.03927e-09
Oacyl	2.11716	2.41296e-09
Gm14085	2.11293	3.00183e-05
Sertad1	2.10664	1.04779e-11
Eif6	2.10329	7.41529e-10
Gmfg	2.10136	3.48897e-07
Lgals3	2.10127	9.04221e-08
Ceacam10	2.10092	8.26426e-07
Adora2b	2.10053	2.4839e-10
Ubtd1	2.09874	7.03927e-09
Trim30d	2.09584	4.13797e-06
Il12a	2.09418	1.51504e-07
Pydc4	2.09354	4.34028e-05
Bcl2l15	2.09299	3.68218e-09
Cmpk2	2.09242	0.000267303
Hbegf	2.09142	2.09574e-07
Relb	2.09063	8.00666e-10
Prtn3	2.09041	3.24531e-06
Neurl3	2.08959	2.91397e-05
Itgb2	2.08925	9.42006e-06
Furin	2.08687	9.98693e-08
Adm	2.08539	2.91614e-05
Syk	2.08218	1.44864e-08
Mcoln2	2.07981	1.59143e-07
Cd8b1	2.07932	0.00407607
Fyb	2.07915	2.91397e-05
Tmem120a	2.07907	1.29955e-08
Lat	2.0769	0.000258139
Rap2c	2.07495	2.41706e-07
Hpx	2.07416	6.85192e-07
Dtx3l	2.07279	1.74705e-05
Ms4a4b	2.0724	0.000765138
Herc6	2.07116	4.87707e-05
Ifi44	2.0711	0.000248269
Slc2a1	2.07082	2.73604e-08
Cotl1	2.06808	1.80553e-06
Pilra	2.06317	0.000149631
Ppp1r3d	2.06142	3.79994e-09
Slc28a2	2.0601	0.000827557
Gm5150	2.05785	2.91397e-05
Pram1	2.05695	2.53956e-08
Runx3	2.05613	2.51838e-05
Hrh2	2.05513	2.14289e-06
Pstpip2	2.05468	1.17589e-06
Alpl	2.054	2.15433e-06
Saa2	2.053	1.54764e-06
Dennd4a	2.05263	8.58008e-11
Phgr1	2.05043	0.000785876
Slfn3	2.05008	1.91884e-05
Parp14	2.05006	2.91397e-05
Fmnl1	2.04414	1.11248e-06
Gm6377	2.04399	3.10226e-09
Ambp	2.04308	1.38434e-06
Erich3	2.04226	1.28037e-05
Dedd2	2.04202	6.31161e-07
Cyba	2.04036	2.50208e-06
Gm13889	2.03892	2.91397e-05
Cd302	2.03351	4.04829e-07
Urah	2.03309	4.9532e-11
Slamf8	2.03299	0.0122923
Tpd52	2.03274	6.88148e-10
Cd300a	2.02838	3.96659e-06
Nfkbib	2.02551	5.58059e-12
Ctsh	2.0239	8.07338e-06
Ogfr	2.01713	3.86205e-08
Eif1a	2.01649	1.86197e-08
Rhoh	2.01523	1.27144e-05
Ube2l6	2.01419	4.71205e-05
Relt	2.01198	1.29842e-07
S100a6	2.00733	1.73361e-06
Tspan4	2.00724	5.74899e-07
Esd	2.002	1.07067e-08
Adssl1	2.00104	5.34132e-11
Gadd45a	2.00094	1.18558e-08
Capza2	2.00003	2.42446e-08
Treml2	1.99822	0.000130597
Odc1	1.9982	2.16166e-07
Sh3bp2	1.99475	5.75784e-06
Stk17b	1.99299	3.37107e-06
Srxn1	1.99169	2.55337e-08
Sin3b	1.99069	5.1034e-08
Ifitm3	1.98975	2.92544e-06
Irgm2	1.98437	1.65442e-05
Zswim7	1.98434	4.74561e-07
Ncf1	1.98113	9.56151e-06
Sema4a	1.97455	6.9003e-06
Ifitm2	1.97305	8.46081e-08
Tes	1.97036	1.9454e-08
Casp1	1.96993	7.83485e-05
Dok3	1.96924	5.77846e-06
Gm21975	1.96828	0.0269782
Gk	1.9661	1.00093e-10
F630028O10Rik	1.96417	3.6021e-06
Crlf2	1.95811	7.43528e-07
Cd84	1.95742	2.47248e-07
1700025N23Rik	1.95723	0.000112569
Rap1b	1.95449	3.39129e-07
Gm15694	1.95192	1.73928e-05
S100a4	1.95052	0.000268679
Arl11	1.95024	1.95246e-05
Gbp4	1.94691	0.00527526
Rcan1	1.94517	1.35499e-09
Clu	1.94503	4.91439e-08
2410006H16Rik	1.94336	8.83441e-07
Krt8	1.93717	2.40626e-06
Gadd45g	1.93553	1.72772e-05
Sh2b2	1.93375	1.18127e-11
Slc7a8	1.93296	0.000221675
Clca3a1	1.9326	2.91397e-05
Pilrb1	1.93184	0.000514577
C130050O18Rik	1.9289	3.34513e-08
Tatdn2	1.92876	1.12453e-07
Osgin1	1.92748	1.88707e-05
Fam107a	1.92256	0.0198663
Samhd1	1.9223	7.3136e-07
Pycard	1.92112	0.000607091
Pira4	1.91746	8.97966e-06
Tma16	1.9143	1.46776e-06
Fmnl2	1.91372	2.91397e-05
Asb4	1.91201	3.43794e-10
Ier3	1.91017	5.09359e-07
Prr7	1.90936	9.17725e-07
Psmb9	1.90367	2.91397e-05
Pnrc1	1.90357	1.17649e-08
Prss27	1.90351	1.35985e-05
Ifitm1	1.90138	3.09743e-05
Sh2d2a	1.90001	2.01139e-05
Snhg15	1.89696	8.99965e-08
Rel	1.89693	7.89635e-07
Nos2	1.89678	0.0038586
Gfpt2	1.8955	1.88309e-07
Basp1	1.89547	0.000499562
Cpne2	1.89344	5.77421e-07
Ppp1r3b	1.89338	3.29796e-08
Cstb	1.89326	2.39729e-05
Fbxl5	1.89144	3.32306e-08
Dusp16	1.89084	8.67434e-09
Il24	1.88991	5.9214e-06
5430427O19Rik	1.88977	2.00288e-07
Nuak2	1.88706	1.86621e-08
H2-Q5	1.88299	1.48314e-06
Acp5	1.87963	2.91397e-05
Mreg	1.87551	5.08664e-05
Mir703	1.87435	0.000936733
Ppp1r18	1.86939	2.41706e-07
Pnp	1.86866	2.91397e-05
1700109H08Rik	1.86794	0.000173358
Gm5424	1.86769	0.000724702
Pnpla2	1.86758	2.91397e-05
Stfa3	1.86658	2.91397e-05
Mir449c	1.86649	0.00232346
Mapkapk2	1.86495	1.49411e-09
Zswim4	1.86341	5.34152e-09
H2-L	1.8604	1.01693e-07
Mmp25	1.85884	1.16081e-05
Ier5	1.85752	1.3904e-09
Gm14005	1.85739	1.22135e-05
Avpi1	1.85557	1.25072e-08
Fosb	1.85405	0.000572882
Mir3061	1.85151	0.00186555
Hsd11b2	1.85146	3.8268e-05
Map3k6	1.8514	0.00962723
Apobr	1.85008	2.91397e-05
H2-T-ps	1.84994	3.00671e-08
Ttc39c	1.84737	4.61911e-07
Rasa4	1.84485	3.10052e-06
Snhg9	1.84441	0.00172666
Jak2	1.84373	4.76715e-07
Krt18	1.84332	1.76002e-06
Lrtm2	1.84315	0.000394462
Dpep2	1.83845	8.39988e-08
Sema4c	1.83828	1.9318e-07
5031414D18Rik	1.83797	1.5165e-05
Nkg7	1.83263	0.00255479
Cebpb	1.83142	5.34461e-08
Ear3	1.82995	0.00201602
Pilrb2	1.82678	6.84645e-05
Atp6v0c-ps2	1.82661	7.56514e-08
Zfp593	1.8232	1.72154e-07
Mirt1	1.82245	1.00772e-06
Gm4070	1.82181	0.000413957
Tnc	1.82179	0.0050308
Tmem213	1.82107	0.00150795
Il13ra1	1.8202	2.91397e-05
Ptgs2	1.81582	5.51935e-06
Il20rb	1.81316	3.86747e-05
Laptm5	1.81243	4.78307e-07
Vav1	1.80829	5.73819e-05
Npy	1.80678	0.0115843
Ssh1	1.8057	1.62961e-05
H3f3b	1.80569	1.08805e-06
Gbp11	1.80516	4.47745e-05
Gpr18	1.80411	0.000803566
Akr1c14	1.80348	0.00711031
Yrdc	1.80346	2.3736e-06
H2-T22	1.80204	3.24973e-08
Stk24	1.79937	7.4409e-08
Ptpn1	1.79717	3.06588e-08
Epsti1	1.79646	0.000105678
Tuba8	1.79623	1.40113e-07
Xdh	1.79547	2.91397e-05
Bcar3	1.7938	0.000790941
Clec12a	1.79122	0.00405882
Fgd3	1.79078	0.000105728
Hoga1	1.78837	2.40571e-06
Piwil2	1.78563	5.70302e-08
Taf4b	1.78348	5.81088e-09
Was	1.78196	2.91397e-05
Mlkl	1.78155	0.000787654
Chd7	1.77699	3.82234e-07
Tbxas1	1.77569	0.000130803
Krt85	1.77215	2.08793e-07
Csf2	1.76982	0.000320726
Ehd1	1.76756	2.92469e-07
Dmxl2	1.76655	1.10335e-07
H2-T10	1.76235	2.11853e-07
Pnp2	1.75983	7.93901e-05
Trim21	1.7595	1.30498e-05
Mdrl	1.75898	3.36166e-05
Jchain	1.7583	0.0303635
Etf1	1.75738	1.37756e-08
1810032O08Rik	1.75508	8.04935e-06
Fbp2	1.75271	1.91884e-05
Rassf5	1.75106	3.37076e-07
Riok3	1.74572	1.02575e-06
Plet1	1.74557	6.57271e-06
Trpm2	1.74472	3.57702e-07
Ifitm5	1.74468	0.000276353
Bcl2l1	1.74453	4.2498e-05
Scrg1	1.74422	0.00757861
Nhp2	1.74393	4.21867e-06
Ell2	1.7425	2.30391e-09
Arpc2	1.74201	9.66065e-09
Arhgdib	1.74179	2.91397e-05
Arhgap30	1.73917	6.76714e-05
Zfp281	1.739	1.03456e-09
Slc2a3	1.73868	2.91397e-05
Gm12185	1.73623	0.000646567
Lgals9	1.73581	2.91397e-05
Cd3e	1.7342	0.00375089
Aif1	1.7309	0.00570644
Cxcr3	1.72877	0.00343016
Ifrd1	1.72783	3.10735e-07
Osmr	1.72097	4.09006e-08
Marcks	1.71766	0.000100784
Irak2	1.71649	3.43073e-11
Elf3	1.71524	2.18977e-05
Il15ra	1.71496	1.83802e-05
Snord89	1.71333	0.00164114
Sell	1.71297	0.00564183
Gapt	1.71272	9.10258e-07
Mafb	1.71262	0.00040471
Pabpc1l	1.71251	6.10238e-07
2200002D01Rik	1.71208	2.91397e-05
S100a10	1.71029	1.48951e-05
N4bp1	1.70927	9.65596e-06
Smim3	1.70911	1.18865e-06
Apbb1ip	1.7091	1.96763e-06
Ifit1bl1	1.70904	0.00400169
Zc3hav1	1.70826	3.86939e-10
Tnfaip8l2	1.70771	0.000154912
Nt5c3	1.70674	2.91397e-05
Ptger4	1.70422	2.91397e-05
Il2ra	1.70212	0.00016149
Tfec	1.69805	2.86177e-05
Nts	1.69723	2.45948e-05
Cst7	1.69353	0.00122311
Wfdc18	1.69347	0.000907115
Mir3091	1.69319	0.000131085
Ccdc122	1.69274	1.37756e-08
Ada	1.69228	0.00304293
Tspo	1.69	7.43376e-07
Dio2	1.68995	3.41673e-06
Ggct	1.68952	2.91397e-05
Cebpe	1.68945	8.12606e-06
Pira1	1.68839	0.00120646
Uchl3	1.68625	1.27898e-05
Wars	1.6856	3.48263e-05
Ifih1	1.68548	4.3044e-05
Ubash3b	1.68547	6.06743e-05
Tapbp	1.68484	2.91397e-05
Krt87	1.68269	1.82088e-09
Snord69	1.68058	0.00740648
Mir146	1.67996	1.4562e-05
Ccl8	1.67945	0.0277677
E130102H24Rik	1.67813	0.0192052
Scel	1.67812	0.00220164
Phox2a	1.67758	1.99103e-07
Vcan	1.67599	8.2849e-07
Cd28	1.67512	2.91397e-05
5730559C18Rik	1.67326	7.22605e-06
Stat2	1.67292	0.000105789
Tnfrsf23	1.67182	9.6627e-11
Csf1	1.67092	2.05525e-05
Cd300c2	1.66794	3.44113e-05
Ptprc	1.66577	0.000242739
Uck2	1.66523	1.05418e-06
Ly6g6c	1.66474	0.0124212
Misp	1.66416	0.000195681
Hk3	1.66196	0.00119179
Cish	1.6613	7.59997e-07
Ffar4	1.66079	7.61596e-05
Zbtb48	1.66001	1.86197e-08
Areg	1.6591	0.000312007
Rnf125	1.65887	0.000279395
C1qa	1.65864	0.000182884
Traf6	1.65831	2.00387e-05
Slc16a6	1.6578	1.05092e-06
Pcgf5	1.65489	9.35422e-06
Tbc1d2	1.6544	2.72068e-06
Frat2	1.64966	8.43709e-08
Cxcl16	1.64753	1.17862e-05
Psma6	1.64623	8.86996e-07
Hsh2d	1.64594	0.000122807
Ly6a	1.6443	1.05977e-08
Snhg5	1.64386	2.91397e-05
Grrp1	1.63977	0.000280911
Actr3	1.63825	3.97092e-06
Rilpl2	1.6365	3.98613e-07
Nfkb2	1.6357	7.84588e-07
Mrap	1.63293	0.0028724
Them5	1.63286	0.00528482
Btbd19	1.63262	1.36731e-07
Sesn2	1.63234	2.47617e-05
Klf6	1.63065	6.41054e-06
Irf8	1.63032	0.00021535
5430416N02Rik	1.62533	3.84433e-07
Slc10a6	1.62453	0.0012177
Mcl1	1.62418	4.27719e-09
Sp110	1.62287	0.000353656
Psme2	1.62205	0.000234998
Nmd3	1.62109	8.9168e-07
Slc39a14	1.61739	3.809e-06
Mir7050	1.6171	0.000435705
Ptp4a1	1.61534	6.7315e-05
Noc4l	1.61445	3.20739e-06
Slc16a1	1.61397	2.72243e-07
Mafk	1.61356	1.28983e-06
Gnl3	1.61167	1.08035e-09
Hnrnpdl	1.61068	5.15984e-06
Gm4285	1.60973	2.91397e-05
Mucl2	1.60847	2.33058e-10
Arhgap15	1.60845	9.91086e-06
Dgat1	1.60775	2.93065e-07
Sowahb	1.60531	2.23717e-06
Ttc39b	1.60472	2.55709e-07
Tbrg1	1.60284	1.49751e-07
Crtam	1.60193	1.7203e-06
Rnf225	1.60183	2.91397e-05
H2-M3	1.60017	6.60667e-06
Tlr7	1.59987	1.63685e-08
Tmem192	1.59953	8.10687e-07
Zc3h12c	1.59773	1.54764e-06
Ikbke	1.59708	0.00764007
Sqstm1	1.59706	9.37636e-09
Ppm1n	1.5967	2.48924e-06
Clp1	1.59635	1.81781e-09
Sit1	1.59207	0.000217444
Ear10	1.58864	0.00110261
Zyx	1.58779	5.48749e-07
Tpm3	1.58727	3.68218e-09
Mfsd7a	1.58405	4.98643e-05
Mir24-2	1.58285	0.00596307
Dhrs9	1.58231	7.12948e-06
Snhg1	1.58221	5.46002e-06
Tmem251	1.58068	7.18596e-07
Nek6	1.58005	1.17598e-06
Plau	1.57953	0.00296213
Lcp1	1.57827	2.53801e-05
Atp8b4	1.57423	2.91397e-05
Phlda1	1.57387	2.11726e-05
Ccne1	1.57309	8.51946e-05
Cited4	1.57206	2.91397e-05
1700017B05Rik	1.57043	1.72525e-06
Gcnt2	1.56968	2.41296e-09
Card19	1.56854	1.34295e-07
Arrb2	1.56843	1.57197e-05
AI662270	1.56798	0.000576257
Ugcg	1.56762	1.98117e-06
Snord12	1.56646	0.000561927
Vnn3	1.56633	2.09738e-05
Lox	1.56614	0.00482806
Upk3bl	1.56476	1.0309e-06
Tubb3	1.56468	0.0130563
Ddit4	1.56232	0.0227626
Ptk2b	1.56123	2.6162e-05
Arf2	1.55929	2.33189e-06
Rnh1	1.55602	7.36835e-08
Slc9a3r1	1.55386	9.95535e-08
Rhoc	1.55378	7.65546e-06
Naip2	1.55258	2.91397e-05
Pdk4	1.55238	0.0202691
2024-03-01	1.55237	5.17781e-07
Plcl2	1.55227	1.05092e-06
4933432I03Rik	1.55038	6.22763e-10
Rab37	1.54811	1.01997e-06
Aqp3	1.5462	0.0411482
Epcam	1.5453	3.03472e-06
Eif5	1.5441	1.20298e-07
C1qc	1.54326	0.000321628
Rassf1	1.54285	2.43381e-08
Slc13a3	1.5427	3.90465e-05
Fes	1.54229	5.51108e-05
Zfas1	1.54207	2.94457e-07
Pkm	1.54178	2.7874e-06
Tinagl1	1.54071	1.21265e-05
Ocstamp	1.54007	0.000314711
Olr1	1.53925	1.84216e-06
Stk19	1.5368	5.25141e-08
Cd63	1.53591	2.04267e-05
Gna13	1.535	6.12639e-06
Pdcd10	1.53435	4.77759e-06
Cd6	1.53396	0.0012134
1700019B03Rik	1.53251	0.000375869
Gpr171	1.53234	0.00169261
Chrac1	1.53206	4.10564e-07
Arhgap9	1.5319	4.03856e-05
Armc7	1.53164	4.28135e-07
Rnasel	1.53158	3.95629e-07
Gpr157	1.53139	0.000228602
Nt5c2	1.53027	4.63456e-07
Cd244	1.5291	0.00057294
Taf1d	1.52635	7.18914e-06
Tmem45b	1.52585	0.0416807
Gapdh	1.52549	2.42544e-07
1600010M07Rik	1.52523	9.88458e-06
Isg20	1.52459	0.00032776
Pwp1	1.52287	1.85035e-07
Ear12	1.51925	0.00117073
4933412O06Rik	1.51917	2.629e-06
Gbp8	1.51845	0.0128039
Picalm	1.51779	7.24611e-08
Tmed5	1.51769	1.0001e-08
Snord33	1.51699	0.0010376
Nrg1	1.51645	2.28018e-05
Vasp	1.51575	2.42039e-05
Arhgap8	1.51541	7.52288e-08
Tmem173	1.51532	0.00155727
Tuba1c	1.51443	2.91397e-05
Def6	1.51294	7.48415e-06
Rnf183	1.51147	1.27949e-06
Cfp	1.51144	4.62798e-05
Ccl17	1.51118	0.00418041
Pard6b	1.50811	0.000712949
Zwint	1.50624	4.1045e-07
A530064D06Rik	1.50592	3.88224e-05
Ffar2	1.50529	7.2735e-06
Il21r	1.50455	0.0094399
Tnfaip8	1.50432	8.44162e-06
Agpat9	1.5035	1.54764e-06
Ceacam1	1.50149	1.26403e-05
Efcc1	-1.5002	5.63869e-06
Dock6	-1.50048	0.00119976
Ces1e	-1.50108	0.00127497
Creld1	-1.50139	1.57005e-09
Lypd2	-1.50146	0.023825
Mest	-1.50193	1.32094e-10
Ltbp4	-1.50548	0.000486733
Ccdc108	-1.50589	0.00304718
Cfap44	-1.50687	0.000118932
Lgi3	-1.50712	2.91397e-05
Eml1	-1.50894	5.06899e-07
Tmem44	-1.50973	6.03212e-05
Bpifa2	-1.50996	7.33585e-05
Ahsa2	-1.50998	3.43794e-10
Atp1a2	-1.51153	0.0014519
5330417C22Rik	-1.51282	8.79118e-05
Stard8	-1.51335	0.000376639
Hist3h2a	-1.51445	5.65412e-06
Uckl1os	-1.51483	4.93712e-05
Ddah1	-1.51682	1.14089e-05
Zfp760	-1.51815	1.37819e-06
Cd79a	-1.52019	0.00338256
Akr1e1	-1.52029	1.53386e-06
Megf6	-1.52137	7.93995e-05
Tcaf1	-1.52252	2.91397e-05
Gm14207	-1.52265	2.44355e-05
Ehd2	-1.52303	9.86685e-08
Rsrp1	-1.52381	0.000565087
Cc2d2a	-1.52438	7.62987e-06
Tmem206	-1.52502	2.12772e-08
Fndc5	-1.52555	0.00161963
Armcx3	-1.52768	1.93667e-06
Map3k19	-1.52959	2.91397e-05
Zfp532	-1.53189	2.72068e-06
Rcn3	-1.5325	1.29161e-06
Col4a6	-1.53364	8.14527e-06
Lamb1	-1.53383	2.91397e-05
Mapt	-1.53952	3.30596e-05
Ccdc180	-1.5415	4.8559e-05
Fmod	-1.54156	1.49486e-05
Spef1	-1.54347	2.07161e-06
Lrrn4	-1.54374	0.0150793
Dleu2	-1.54412	6.29765e-06
Ly6d	-1.54435	0.0189367
St6galnac3	-1.5448	8.29659e-07
Gm38426	-1.54513	5.9207e-06
St3gal2	-1.54556	1.91599e-06
Fbln2	-1.54613	3.27331e-09
Rgs11	-1.54703	0.00544999
Pomt1	-1.54924	1.28806e-07
Spns2	-1.54944	3.19732e-06
Dnah5	-1.5552	3.25018e-05
Gabrp	-1.55539	0.000576508
Tek	-1.55634	7.13342e-05
Mtss1l	-1.55644	6.96256e-06
Slc25a42	-1.55755	2.55074e-05
Iqca	-1.55841	0.000140264
Fam222a	-1.55948	2.81291e-08
Bphl	-1.56183	1.10841e-05
Tcte1	-1.56403	0.00041634
Trmt1l	-1.56418	8.47574e-05
Igip	-1.56574	6.48939e-05
Cdon	-1.57112	3.73264e-07
A330009N23Rik	-1.57763	1.13445e-05
Npr1	-1.57884	1.42672e-05
Kdelc1	-1.58093	1.18643e-08
Fmo3	-1.58255	0.0270191
2700081O15Rik	-1.58283	1.79467e-07
Gucy1a3	-1.58443	4.78435e-05
Lrp2	-1.586	2.91397e-05
Col5a1	-1.58743	3.02514e-05
Tgfb3	-1.58764	4.40345e-07
Ddr2	-1.58849	5.16224e-09
Clec14a	-1.58955	0.000120054
Phkb	-1.59274	7.9062e-09
Myh7	-1.59283	2.91397e-05
Lrrc46	-1.59523	0.000950764
Gstm1	-1.59734	0.00213999
Ndufa4l2	-1.5974	2.91397e-05
Hepacam2	-1.59753	1.12736e-08
Dnaja4	-1.59787	1.4995e-06
Impdh1	-1.59843	5.69752e-06
Cyp4f15	-1.59999	2.54556e-05
Zmynd10	-1.60435	0.000280595
Ppp1r16b	-1.60443	6.57271e-06
Ccdc170	-1.60522	2.09412e-05
Rnf144a	-1.60601	4.16582e-06
Adgrl1	-1.60766	2.27253e-05
She	-1.60774	2.91397e-05
Tpra1	-1.60955	3.00621e-08
Col15a1	-1.61318	4.6247e-05
Tpcn1	-1.61587	1.18897e-06
Tmem221	-1.61883	0.000129928
4930402H24Rik	-1.62034	9.95535e-08
Cpb1	-1.62112	0.00393642
Vwa3a	-1.62134	0.000117487
2024-09-04	-1.62214	2.71535e-06
Olfm2	-1.62264	0.0012484
Chordc1	-1.62343	9.33162e-06
Drc1	-1.62432	0.000142654
Adgra3	-1.62622	8.25213e-07
Calhm2	-1.6306	4.02441e-05
Rptn	-1.63097	0.00420312
Fam92b	-1.63242	0.00070969
Colgalt2	-1.63372	2.46293e-05
Cfap52	-1.63395	0.000115688
Chd3	-1.63512	2.91397e-05
Mfap2	-1.64061	0.000267183
Ppp1r14c	-1.6411	1.18339e-06
2810002D19Rik	-1.64176	2.0963e-07
Ccdc162	-1.64281	7.79178e-05
Rnf186	-1.64473	2.91397e-05
Ncbp2	-1.64568	5.70691e-06
C2cd4b	-1.64681	3.88537e-05
Tnnc1	-1.6486	0.0347719
Ugt1a6a	-1.64872	2.91397e-05
Fam193b	-1.65264	0.000840888
Ccdc146	-1.65274	7.50785e-05
Foxf2	-1.65285	1.47064e-06
Meox2	-1.65303	1.34772e-06
4833427G06Rik	-1.65446	0.000147067
Pdgfd	-1.65673	2.91397e-05
Tmem94	-1.65763	2.91397e-05
Scube2	-1.65971	0.000392702
Wdr63	-1.66042	7.37818e-05
Disp2	-1.66128	0.000322504
9430020K01Rik	-1.6613	2.91472e-05
Ttc21a	-1.66154	0.00011884
Higd1b	-1.66263	1.86709e-05
Aoc3	-1.66288	4.99875e-05
Klhdc8b	-1.66399	4.62555e-05
Lace1	-1.66484	9.05282e-09
Fam166b	-1.66594	1.99615e-05
Fcmr	-1.66666	0.00252735
Arap3	-1.67207	3.81434e-05
Pllp	-1.67248	3.02618e-05
Pnlip	-1.67486	0.00624323
Fzd2	-1.68337	1.65296e-07
Gm11627	-1.6872	2.87407e-05
Ccdc39	-1.6889	0.000195757
Kank3	-1.68937	0.000916122
Hist2h2be	-1.68982	3.45617e-09
Adgrg6	-1.69081	4.46127e-07
Myl1	-1.69605	0.0235209
Ldb2	-1.69767	2.92469e-07
Asgr1	-1.69804	8.59499e-05
Pxdn	-1.70033	8.56106e-06
Palmd	-1.70143	2.91397e-05
Lrrc17	-1.70167	3.05513e-07
Kcnk3	-1.70528	4.69438e-05
Cfap100	-1.7072	9.76001e-05
Dnaaf1	-1.70919	6.41572e-05
Dmpk	-1.70965	1.93912e-07
Mrgprf	-1.7103	7.11101e-07
Homer3	-1.71052	2.7938e-08
Fbln1	-1.71173	1.75552e-06
Try4	-1.71192	0.00654094
Ces1g	-1.71388	0.001016
Cfap161	-1.71514	0.00037493
Cfap77	-1.71667	8.95273e-05
Mfap5	-1.71714	1.06325e-05
Pcyox1l	-1.72033	5.18527e-07
9630028I04Rik	-1.72183	2.88397e-05
Hmcn1	-1.72247	3.03472e-06
Dnah6	-1.72281	2.91397e-05
Gdf10	-1.72376	2.27164e-06
Ugt1a6b	-1.72584	2.91397e-05
Thbd	-1.72643	8.64596e-05
Wif1	-1.72711	2.35391e-06
1700024G13Rik	-1.72969	0.00592966
E030019B13Rik	-1.73095	0.000107469
Ankrd63	-1.73135	7.30884e-05
Ptgfr	-1.7359	2.56393e-09
Hspa12b	-1.73885	0.000143393
Spib	-1.73984	0.000727079
Pnliprp1	-1.74018	0.00270131
Nrp1	-1.74033	4.35346e-07
Bmp6	-1.74308	0.000181781
Gm973	-1.74527	3.95366e-05
Cox7a1	-1.74553	0.021042
Mamdc2	-1.74621	7.27562e-05
Rnase1	-1.74666	0.00110845
Slc2a4rg-ps	-1.74902	1.616e-05
Cd19	-1.75326	0.00117213
Aspn	-1.75403	4.93659e-08
Tspan18	-1.76054	0.00549428
Dll4	-1.76369	0.000232688
Pcdh1	-1.76413	2.91397e-05
Synm	-1.76419	4.67974e-08
Gas1	-1.76536	2.91397e-05
Prdm6	-1.76753	3.23526e-07
Pcdh18	-1.76934	9.76672e-06
Hdhd3	-1.77352	0.000217416
Slc25a35	-1.77532	1.14853e-06
Pisd-ps1	-1.77705	0.000358746
Cfap157	-1.77706	2.91397e-05
Fam161b	-1.78077	3.51905e-06
Aldh1a7	-1.78105	1.05822e-05
Tnfrsf19	-1.79016	2.10314e-09
Alg14	-1.79164	3.3268e-09
Nat8f7	-1.79274	6.13062e-09
Nat8f3	-1.79745	6.35394e-08
Ms4a1	-1.79805	0.00203458
Sod3	-1.79919	1.58503e-07
Wnt3a	-1.80295	0.000155951
Fkbp4	-1.80571	1.59347e-09
Proca1	-1.81035	2.10335e-09
Kcnj13	-1.81126	5.15778e-07
Aldh1a1	-1.81379	8.77784e-05
Stmn2	-1.81472	0.000958367
Prelp	-1.81577	0.000156682
Sox4	-1.82022	1.58532e-05
Smarca2	-1.82565	1.27648e-07
Prr18	-1.82621	6.51502e-07
Adamts17	-1.82657	3.27034e-08
Mir145a	-1.8268	5.63345e-05
Cyp4a12b	-1.82742	0.0178734
Hhip	-1.8281	1.97003e-13
Npr3	-1.83885	0.0031223
Prickle1	-1.84349	5.17774e-07
Fam13a	-1.85072	4.01281e-07
Pex6	-1.85425	2.29942e-06
Abca8a	-1.85489	6.97699e-05
Hspg2	-1.85598	4.99909e-07
Cat	-1.85704	2.11447e-05
Mir6935	-1.86015	7.64992e-05
Ift80	-1.86192	2.55337e-08
Tmem100	-1.86755	0.000268253
Chst7	-1.87393	6.34024e-09
Proser3	-1.87601	1.9318e-07
Emid1	-1.87673	8.49019e-07
Casq2	-1.8839	0.0132408
Dnali1	-1.88835	5.36307e-05
Meis1	-1.88905	4.47906e-08
Lbh	-1.89046	2.36103e-08
Tie1	-1.89347	1.84887e-05
Adh7	-1.89743	0.0121678
Chad	-1.90032	0.00864349
Cnn1	-1.90264	0.00188681
Asb2	-1.90393	1.74249e-05
Mgat3	-1.90718	2.75958e-05
Nxpe4	-1.90817	1.30989e-07
Ogt	-1.91228	2.48435e-05
Dnaic1	-1.91314	1.42311e-05
Amt	-1.91482	1.49241e-11
Igsf10	-1.91529	6.88148e-10
Cnpy4	-1.91681	3.41489e-10
Scn3b	-1.91763	5.56257e-05
Six5	-1.91823	4.80981e-09
Mfap4	-1.9305	2.91397e-05
Mettl3	-1.93136	7.91385e-06
Tst	-1.93175	9.13231e-07
Notch4	-1.93203	0.000476993
Nrep	-1.93794	4.65582e-06
Pdzd2	-1.94322	0.000100997
Pdia5	-1.9447	3.20184e-07
Myo5c	-1.94584	1.39127e-05
Col6a3	-1.94694	3.15669e-05
Kdr	-1.94974	3.04406e-05
Lgals2	-1.95468	0.00201928
Lmod1	-1.95639	2.51261e-07
Sfrp2	-1.95982	0.000122093
Hist1h1e	-1.96717	2.33247e-05
Col14a1	-1.97247	3.71003e-07
Mir7091	-1.97508	6.42008e-05
Fendrr	-1.97693	0.00280597
Eln	-1.97813	0.00086749
Tbxa2r	-1.98081	2.47248e-07
1700007K13Rik	-1.98587	2.91397e-05
Pdia4	-1.98871	6.35394e-08
Rsph4a	-1.98911	2.91397e-05
Aox1	-1.99006	6.94406e-07
Pgm5	-1.99028	3.43073e-11
Mns1	-1.99134	6.04512e-05
Thbs3	-1.99349	1.16566e-07
Ggcx	-2.00377	4.95033e-08
Sema3g	-2.00523	0.00224411
Pax5	-2.0135	2.28544e-05
Col1a2	-2.01762	4.2729e-06
Art4	-2.01843	2.54955e-07
Akap14	-2.01889	9.168e-06
Fmo1	-2.01977	9.71346e-05
Sh3tc2	-2.02645	5.51935e-06
Itga8	-2.02792	9.41102e-06
Spice1	-2.03476	3.2664e-07
Fam161a	-2.03557	2.12336e-05
Ccpg1os	-2.03584	1.04122e-05
Mybphl	-2.0409	0.0312125
Pcolce	-2.04262	3.37076e-07
Olfml2a	-2.04582	1.81215e-06
Myl9	-2.04801	4.81676e-07
Clec1a	-2.05258	2.1198e-05
Ddx17	-2.05598	1.57929e-06
Pisd-ps2	-2.0584	5.82349e-05
Fcrls	-2.06215	1.54249e-06
Serf1	-2.06833	1.14159e-06
Sh3bgr	-2.08065	2.84881e-07
Fam162b	-2.08082	2.40779e-06
Hey1	-2.08659	2.12649e-05
Itga1	-2.09385	4.28561e-06
Cela2a	-2.09942	0.00241472
Kctd21	-2.09961	2.91397e-05
Maats1	-2.10532	2.17777e-06
Stmnd1	-2.1084	3.37563e-05
Myct1	-2.10871	1.05092e-06
Ccdc129	-2.11702	2.61182e-05
Ctrb1	-2.12253	0.00569619
Fgfr4	-2.126	7.05545e-06
Kit	-2.12765	5.74899e-07
Myh11	-2.13495	3.01915e-06
Atp6v1b1	-2.13707	0.000186286
Ripply3	-2.15623	1.20778e-05
Pcolce2	-2.15753	2.44628e-05
Myl4	-2.17741	0.0325466
Aard	-2.17989	6.10441e-07
Arhgef15	-2.18667	1.20241e-05
Fam216b	-2.20089	1.55953e-05
Calcrl	-2.21045	4.22078e-05
Cyp2f2	-2.21235	0.00074788
Mgl2	-2.22576	6.67077e-07
Pkn3	-2.22706	5.94063e-06
Kank4	-2.23799	8.18015e-07
Sh3d19	-2.26135	2.46574e-06
Lrat	-2.26586	2.91397e-05
Slc4a5	-2.26889	1.52663e-07
Cd209a	-2.27402	2.91397e-05
Hsph1	-2.27463	2.35329e-08
Carmn	-2.27627	4.12988e-06
Mrc2	-2.28494	5.18696e-09
Myh6	-2.32584	0.0200735
Wdr78	-2.33558	1.05092e-06
Cckar	-2.34342	2.71778e-07
Rtp3	-2.35165	4.37298e-07
Tril	-2.35642	9.56266e-09
2610507I01Rik	-2.35801	7.97166e-08
Col1a1	-2.37285	1.05822e-05
Ackr4	-2.37878	6.7356e-08
Myl3	-2.38073	0.0196248
1810011O10Rik	-2.38563	1.10212e-08
Slc38a5	-2.38617	5.14983e-06
Gja5	-2.41982	1.26843e-05
Wscd1	-2.42775	1.73491e-06
Actc1	-2.42888	0.00236459
Ces1f	-2.46756	0.000390794
Serpinh1	-2.47552	8.38138e-08
Mettl24	-2.48832	1.23361e-11
Hc	-2.48906	0.00017445
Rasgrp3	-2.49309	8.25213e-07
Adh1	-2.49775	5.76447e-08
Pde5a	-2.50796	9.68101e-08
Fam101a	-2.50826	1.38166e-08
Rtkn2	-2.54036	0.000212485
Tgoln2	-2.56538	0.0150524
Slc7a10	-2.56979	9.83331e-06
Clec11a	-2.60176	1.07272e-08
Mb	-2.60918	0.0200644
Scn7a	-2.61521	2.37593e-07
Ckm	-2.61935	0.0257774
Fabp1	-2.62361	2.05662e-05
Col3a1	-2.67942	6.34693e-07
Clec3b	-2.69294	5.76447e-08
Neat1	-2.69407	0.00177668
Wfdc1	-2.70372	2.41296e-09
Acsm1	-2.81197	7.62278e-07
Rbp7	-2.89783	2.13689e-05
Glp1r	-2.94488	2.91397e-05
Pcdh12	-2.96564	1.05699e-08
Colq	-2.96972	5.9207e-06
Ushbp1	-2.99786	2.01436e-06
Sox18	-2.99802	5.09572e-06
Apln	-3.38902	3.9706e-06
B430010I23Rik	-3.41672	1.27571e-07
Aplnr	-3.43301	1.10292e-06
Cyp1a1	-3.66211	5.87009e-07
Spon2	-3.78656	4.13961e-08

## Sheet: STable7. Delta 3dpi
GeneID	Log2 Fold Change	FDR Value
Saa3	8.02274	3.70592e-09
Cxcl10	7.95156	7.21872e-09
Ccl2	6.87583	1.11278e-07
Cxcl9	6.61739	7.93001e-09
Irf7	6.60527	1.00819e-15
Rsad2	6.50149	4.89195e-10
Ccl7	6.04592	1.30574e-05
Isg15	5.94532	1.53151e-09
Ms4a4c	5.93573	7.82653e-07
Ifi204	5.88758	1.09887e-08
Ly6i	5.88618	4.89195e-10
Zbp1	5.86942	3.60323e-10
Gm12250	5.82217	8.66013e-09
Ubd	5.70405	2.9689e-08
Sprr1a	5.65842	7.51679e-09
Fcgr1	5.56433	2.25743e-08
Xcl1	5.27521	2.95969e-07
Mnda	5.22334	6.74544e-08
Cfb	5.18763	1.15479e-10
Ifi205	5.15325	2.18033e-07
Acod1	5.12689	6.02794e-09
Ly6c2	5.12233	7.74468e-11
Oas1g	5.1037	7.42515e-10
Oasl1	5.05748	2.54606e-07
Fam26f	5.05438	6.73295e-07
Tgtp1	5.03335	5.71989e-09
Ifi27l2a	5.00405	6.95317e-11
Oas1a	4.97299	6.58885e-09
Il18bp	4.94483	4.81818e-10
Timp1	4.94075	1.86953e-07
Ms4a6c	4.93389	8.22177e-11
Ms4a6b	4.90155	1.80622e-09
Oas3	4.88896	3.11131e-10
Apol9a	4.88567	1.04478e-11
Apod	4.86823	7.43909e-09
Ccl4	4.85222	9.39419e-07
Ms4a6d	4.8409	6.02794e-09
H2-Q9	4.76172	9.04259e-08
Iigp1	4.71765	1.22528e-08
Mx1	4.70345	1.78841e-08
Ifit1bl1	4.69258	7.21872e-09
Phf11a	4.6507	3.14755e-08
Cxcl13	4.64277	1.11097e-07
Ifit3	4.59368	9.72424e-12
Slfn1	4.58726	1.42576e-07
Ifit3b	4.58032	7.75624e-11
Fcgr4	4.51808	6.44355e-08
Plac8	4.51644	5.18968e-07
Igtp	4.49299	7.21872e-09
Gzmb	4.46297	1.79586e-05
Ifit1	4.45865	8.22177e-11
Ccl12	4.3919	9.97227e-05
Gbp5	4.39075	5.13261e-07
Gbp2	4.38369	1.65481e-06
C3ar1	4.3711	8.69007e-08
Ifit2	4.34897	2.75363e-07
Gbp10	4.34164	3.15425e-07
Tgtp2	4.32339	3.66938e-08
Apol9b	4.31749	4.58127e-11
Phf11b	4.31258	7.87107e-08
Dhx58	4.31057	1.09887e-08
Ccr5	4.30374	3.67665e-06
Serpina3g	4.30168	5.72339e-07
Irgm1	4.25486	3.82374e-09
Arg1	4.21072	4.87876e-05
Ifi47	4.19706	1.25697e-07
Serpina3m	4.19005	5.72339e-07
LOC100038947	4.15889	2.437e-09
Sirpb1a	4.15825	1.43386e-09
AA467197	4.1579	3.2456e-05
Retnla	4.13326	4.13183e-07
Phf11d	4.0633	5.25256e-09
Serpina3f	4.04694	8.31957e-06
BC147527	4.0409	1.67411e-06
Cd274	4.02851	8.55493e-08
Gbp6	3.96454	7.14147e-07
Pla1a	3.95282	3.82675e-09
Usp18	3.92546	1.71587e-08
Ifi44	3.90675	1.0156e-07
Orm1	3.89763	6.81381e-09
Lilrb4a	3.85219	2.23863e-08
Gm4951	3.84711	1.56138e-08
Msr1	3.79377	2.78399e-08
H2-T9	3.78278	5.80429e-14
Wfdc17	3.78172	2.80699e-05
Gm15056	3.7684	4.00697e-05
Tlr9	3.70874	3.26334e-06
Gm5431	3.68875	2.21107e-08
Sectm1a	3.68024	7.54894e-08
Ccr1	3.67707	3.02506e-06
Sirpb1b	3.67637	4.19877e-09
Gbp3	3.67457	1.82021e-07
Trex1	3.67229	7.24214e-09
Slc26a4	3.66451	3.045e-06
Socs1	3.6141	4.52882e-05
Clec7a	3.60968	6.64698e-08
Cd180	3.60257	1.49664e-06
Ms4a7	3.60035	2.95593e-07
Slamf9	3.59966	1.36788e-08
Slfn2	3.58798	3.50665e-08
Gm4841	3.57711	3.26405e-07
Cyp4f18	3.55779	7.42515e-10
H2-T23	3.55304	7.61818e-15
Oasl2	3.55293	1.51369e-07
Lpxn	3.54268	1.35367e-08
Aif1	3.52972	7.9288e-06
Cxcl11	3.52459	8.17541e-07
Ptafr	3.52326	3.88189e-07
Clec4e	3.51376	2.59597e-07
Cmpk2	3.50908	1.19363e-06
Gatm	3.46204	3.31863e-05
Tap1	3.45692	2.19417e-09
Saa1	3.43366	7.22931e-08
Gm6904	3.42471	2.94499e-11
Trem2	3.41849	1.05939e-05
Lrrc25	3.41602	3.38918e-06
Psmb8	3.41045	2.52256e-09
Lilr4b	3.40191	1.89407e-07
Gzma	3.37807	2.9875e-06
Lgals3bp	3.37653	1.81419e-11
Gm11127	3.36573	6.17887e-07
Ccl1	3.35169	4.35162e-08
Ctss	3.35135	4.81623e-09
H2-T22	3.34116	5.80429e-14
Pyhin1	3.29954	2.91469e-05
Rtp4	3.29847	8.25801e-10
Tgfbi	3.29795	1.29397e-06
Irgm2	3.28086	7.51679e-09
Il1rn	3.27343	1.52245e-05
Gpr141	3.26952	2.55419e-07
Ms4a4b	3.26813	1.22759e-05
Rbm3	3.25093	1.53151e-09
Slamf8	3.24001	0.000440605
Tlr13	3.23822	8.66013e-09
Ube2l6	3.2338	2.3378e-07
Ch25h	3.23256	7.50367e-07
Gpnmb	3.21637	7.35797e-06
Gzmc	3.2142	9.95795e-07
Lcn2	3.20379	8.56688e-08
Pycard	3.20231	3.7614e-06
Mpeg1	3.19741	1.53151e-09
Tnip3	3.19505	1.09887e-08
Slfn8	3.19081	2.9655e-06
AI607873	3.18229	2.4121e-07
Ido1	3.17676	3.53824e-05
Ccl3	3.17445	3.60547e-05
Herc6	3.17215	3.47537e-07
Gm21188	3.16635	1.67411e-06
Batf2	3.1638	1.70886e-05
B430306N03Rik	3.15261	4.79889e-08
Trim30a	3.14874	8.00474e-08
Cldn4	3.13289	1.1211e-05
H2-Q6	3.13015	4.08961e-12
Scimp	3.11621	3.80823e-05
Xaf1	3.10188	2.19417e-09
Cd72	3.09833	2.12798e-05
H2-Q8	3.09514	1.1924e-11
Lst1	3.0765	1.05433e-05
Slfn4	3.06853	0.00106099
Siglec1	3.06594	8.30604e-08
Themis2	3.06218	4.47819e-06
Clec12a	3.02533	4.73267e-05
Sh2d1b1	3.02049	4.21285e-10
H2-Q7	3.01866	3.27205e-08
Mlkl	3.01125	2.6388e-06
Olfr56	3.01065	1.68571e-07
Psmb9	3.00418	4.3598e-08
Phf11c	2.9978	0.00496749
Slc15a3	2.99751	1.60171e-06
Apoc2	2.99519	1.2241e-05
Pla2g7	2.99061	4.52181e-06
Plau	2.9808	4.95381e-06
Epsti1	2.97676	2.09778e-07
Tarm1	2.96449	7.79887e-05
Fcer1g	2.93598	3.22985e-07
Cd300a	2.92703	7.43909e-09
Lgals9	2.92426	2.63386e-08
I830077J02Rik	2.91825	2.86062e-06
Casp4	2.91473	1.07861e-06
Stat1	2.91362	6.32981e-06
Tnfrsf12a	2.90721	4.79889e-08
C1qb	2.90238	1.65375e-07
Mx2	2.89327	5.72339e-07
Cd300lf	2.87169	3.7713e-07
H2-Q5	2.87111	1.53646e-09
Il1r2	2.86527	0.00589506
Ifng	2.86063	0.000542658
Bst2	2.85994	5.2418e-08
Gjb5	2.85079	1.9611e-09
Fosl1	2.84981	1.62495e-07
Klra2	2.84062	1.27416e-07
Il2rb	2.83824	3.07845e-05
Slamf7	2.83424	9.44111e-06
Ifi27l2b	2.83322	6.74544e-08
Cd68	2.82955	7.43629e-09
C2	2.81716	5.45285e-08
Ackr1	2.81627	7.21551e-05
Tyrobp	2.81392	8.03792e-08
Ddx60	2.81218	2.95593e-07
Arl11	2.80283	7.54894e-08
Hsd11b2	2.80052	2.2965e-07
Slc11a1	2.79951	5.80443e-06
Cd300c2	2.79607	5.53627e-08
Cd53	2.7823	1.78482e-07
Clec4a3	2.78124	5.77312e-08
Serpina3n	2.77656	7.85695e-07
Aoah	2.76969	3.70019e-05
Pydc4	2.75924	3.25279e-06
Snx20	2.75016	6.23694e-06
Jchain	2.7481	0.00274348
Gm5424	2.7441	3.05096e-05
Rgs16	2.74262	6.80343e-07
Car13	2.7411	9.66937e-08
H2-K1	2.72971	7.80192e-15
Bcl2a1b	2.72805	1.26593e-05
Lag3	2.72108	3.42695e-06
Gzmk	2.70812	0.000446947
Evi2a	2.70027	1.15162e-06
Gins2	2.69269	1.00219e-06
Slpi	2.68875	1.09146e-05
Gpr31b	2.68493	2.1025e-06
Slc39a2	2.68234	2.42572e-08
Pld4	2.67958	1.68571e-07
Ccl5	2.67825	1.96568e-05
Gm5150	2.6769	1.51558e-06
Tnfrsf9	2.6729	2.99443e-06
Pira2	2.66736	3.97743e-07
Slfn9	2.6576	4.58469e-06
H2-Q4	2.65738	5.20942e-13
Mmp8	2.65544	0.00029371
Cybb	2.64554	1.34017e-06
Clec4n	2.63013	9.1387e-07
Gm12185	2.62535	1.13242e-05
Trim30d	2.62521	1.36093e-07
Il6	2.61966	2.13381e-05
Arg2	2.61756	1.90518e-05
Selp	2.61701	4.62786e-05
Tigit	2.61477	1.96568e-05
BC094916	2.61081	5.6677e-06
Gjb4	2.60914	1.21656e-08
Slc28a2	2.60884	0.000175715
Pirb	2.60852	2.15841e-05
Efcab3	2.5805	1.65481e-06
Sh2d1b2	2.57481	5.40197e-07
B2m	2.5712	4.2875e-13
AW112010	2.5607	2.5176e-05
Ctsh	2.55882	3.98747e-07
Sp140	2.54751	8.76908e-08
Ifnl2	2.54474	1.99308e-06
Orm2	2.54286	2.18944e-07
Tlr2	2.53507	1.59553e-06
Hmga1-rs1	2.53325	2.46056e-06
Ncf4	2.52009	1.87865e-05
Ifitm3	2.50813	1.31267e-07
Cd52	2.50726	6.88976e-05
Prf1	2.50682	0.00034661
Ctsw	2.50607	0.000242001
Ucp1	2.50232	0.00197088
Nt5c3	2.49582	2.4121e-07
Ccl9	2.49554	8.23078e-07
Klra7	2.4911	3.61566e-08
H2-Q1	2.4892	1.26974e-11
H2-D1	2.48417	5.80429e-14
Fkbp5	2.47287	0.00197933
Lat2	2.47235	4.12265e-07
Lgals3	2.47211	1.10697e-08
Retnlb	2.47153	2.63386e-08
Apol6	2.46941	1.90518e-05
Psmb10	2.46931	2.74272e-05
Ly86	2.46876	4.18706e-06
Gbp4	2.46566	0.00184199
Dtx3l	2.46507	2.33202e-06
Ifitm6	2.45797	0.0241016
Tnfaip8l2	2.45735	4.96592e-06
Cyba	2.45644	2.45247e-07
H2-L	2.45629	8.69673e-10
Lcp2	2.45613	4.10249e-05
Fgr	2.45141	0.000122319
Klrk1	2.45017	2.6388e-06
Ifih1	2.44758	6.30336e-07
Milr1	2.44697	7.43909e-09
Gpr84	2.44466	5.28761e-05
Atf3	2.44354	5.35724e-06
Cd200r4	2.43845	1.27483e-07
Irf5	2.43774	1.43833e-05
Gbp8	2.43439	0.000461985
Ifnl3	2.43336	7.78893e-08
Nkg7	2.42738	0.000529167
Gm13363	2.42255	0.0281982
Pik3ap1	2.42222	8.7111e-05
Socs3	2.41616	2.61963e-05
Tgm1	2.41545	2.17429e-08
Psat1	2.4154	2.80622e-08
Hpx	2.4144	8.01092e-08
Lair1	2.4024	3.21118e-08
AB124611	2.40161	6.57552e-05
2810417H13Rik	2.39824	7.33551e-06
Asprv1	2.39702	0.0254215
Tk1	2.39494	2.83243e-06
Gbp11	2.39314	4.25421e-06
Parp12	2.39096	7.82653e-07
Parp9	2.39081	4.19947e-07
Bcl2a1d	2.39077	7.54999e-05
H2-M3	2.38339	1.47889e-08
Bambi-ps1	2.37702	3.66938e-08
C1qa	2.37668	8.10325e-06
Trem3	2.37221	0.000445141
Dck	2.36719	4.25421e-06
H2-T-ps	2.36662	4.03703e-10
Slc7a8	2.36535	6.29449e-05
Tubb3	2.3595	0.000987064
Klrg1	2.35132	4.3383e-07
Dusp5	2.35115	1.44676e-09
Cst7	2.34732	8.95202e-05
Cd300e	2.3408	1.06778e-06
Ocstamp	2.33992	7.54714e-06
Fcgr3	2.33871	2.76174e-05
F830016B08Rik	2.33834	2.51979e-06
Rab32	2.33745	8.31957e-06
Gla	2.33553	3.6889e-08
Ppa1	2.33327	1.01799e-05
C1rb	2.33248	1.79539e-09
S100a14	2.3306	0.000217232
Cd86	2.32588	2.33389e-05
Daxx	2.3242	1.01037e-05
Serpina3i	2.32357	2.79004e-05
Gm9733	2.32286	0.00167997
Pnp2	2.32283	9.05034e-06
Klra18	2.32205	6.41974e-07
2010005H15Rik	2.31838	1.07067e-05
Fgl2	2.31757	6.0115e-05
P2ry13	2.31719	1.23002e-05
Acta1	2.31673	0.0256895
H2-T10	2.31204	1.9611e-09
F10	2.30656	0.000137095
Hsh2d	2.30516	4.39743e-06
Insl6	2.30348	2.34562e-05
Hk3	2.30262	0.000103623
Spi1	2.30098	4.36419e-06
Ly6a	2.29918	2.59949e-11
Il12rb1	2.29442	4.79455e-05
Lacc1	2.29403	3.46569e-05
Ncr1	2.2936	0.000156651
Coro1a	2.28542	2.71397e-05
Serpinb9b	2.28421	5.84649e-06
Pim1	2.28275	3.43e-05
Ear3	2.2738	0.000639026
Tnf	2.27375	1.2696e-06
Clec4a1	2.26673	0.000408109
Havcr2	2.26647	9.48164e-07
Gm14085	2.26502	5.12309e-05
Sectm1b	2.2613	0.00011655
Lgmn	2.26089	6.17887e-07
Pstpip1	2.26004	3.43716e-05
Psca	2.2545	1.74609e-05
Capg	2.25336	5.72339e-07
Gm15133	2.25158	1.31303e-08
Hcls1	2.25061	1.9437e-05
Cd3d	2.24601	0.00155155
Tmem86a	2.24357	4.1085e-07
Trim21	2.24304	3.97847e-07
Rpph1	2.23992	0.000107295
Mir449c	2.23896	0.00116746
Chaf1b	2.23225	4.39983e-08
Cstb	2.23174	4.61455e-06
Igsf6	2.23055	6.42418e-05
Naip2	2.2218	3.66496e-07
Casp1	2.221	7.14731e-05
Snx10	2.21712	1.27681e-06
Psme2	2.217	2.12108e-05
Pira6	2.21409	1.39277e-06
Ccr2	2.20857	0.000730447
Cd300ld	2.20781	5.2146e-06
Tifa	2.20756	4.1428e-05
Bcl2a1a	2.20635	0.000217125
A630012P03Rik	2.20474	6.02794e-09
Ms4a4a	2.20197	1.18006e-05
Gm4070	2.20143	0.000151285
Plek	2.19138	6.23985e-06
Sp110	2.18695	3.64925e-05
Stat2	2.186	1.50944e-05
Glipr2	2.1851	1.95408e-06
Clec4a2	2.18253	2.17106e-07
Adgre1	2.18118	2.25726e-05
Prss22	2.17946	6.44781e-05
Mt2	2.17691	0.00331229
Pilra	2.17577	0.000295955
Sell	2.16994	0.00194999
Itgam	2.16707	7.70544e-05
Nnmt	2.16666	1.4505e-06
Tnfsf9	2.16206	9.51016e-08
Tspan4	2.15978	3.63131e-07
Tmem106a	2.15757	7.30687e-05
Cd84	2.15502	8.13902e-08
G530011O06Rik	2.15237	0.000450459
1600014C10Rik	2.15096	1.69166e-05
Mitd1	2.15074	1.27844e-07
Plekho2	2.14798	1.38757e-05
Itgb2	2.14672	1.24817e-05
Psme1	2.14521	1.4905e-07
Tnnc2	2.14221	0.0251856
Ifnb1	2.14001	3.70019e-05
Xdh	2.13899	1.03657e-05
Apobec1	2.13455	4.56125e-07
Ifi35	2.1312	2.51979e-06
Was	2.12394	9.51235e-06
Acp5	2.12228	9.73342e-06
Bex6	2.11451	4.64076e-08
9930111J21Rik2	2.11436	7.00437e-07
Tspo	2.11415	3.25955e-08
Mafb	2.11068	0.000115821
Wt1	2.10829	7.97055e-07
Tmem173	2.10747	0.000122594
C1qc	2.10741	2.98195e-05
Sct	2.10693	2.4121e-07
Gpr171	2.10686	0.000151673
Smpdl3b	2.10641	6.49706e-05
A530064D06Rik	2.10031	1.70578e-06
Mir7008	2.09936	7.43488e-06
Rnf149	2.09717	1.34247e-06
Cd69	2.09505	0.000281392
Lgals7	2.09485	0.0478587
Gm17757	2.09209	5.22077e-05
Cd48	2.09003	3.79452e-05
Sla	2.08806	4.98309e-06
Glrx	2.08291	2.31611e-05
Gm21975	2.08261	0.0395518
Tmem37	2.081	7.25383e-05
Ms4a8a	2.08035	3.66496e-07
Trafd1	2.07622	5.83639e-06
Ccl8	2.07387	0.0168703
2410006H16Rik	2.06762	6.86357e-07
Slc7a5	2.06489	2.19417e-09
Clec5a	2.06436	1.88418e-05
Pnp	2.06039	2.87652e-05
Saa2	2.05989	3.26334e-06
Sema4d	2.05902	6.77924e-05
Tbxas1	2.05716	7.72569e-05
Gbp7	2.05652	0.000156696
Lgals1	2.05328	6.24144e-05
Pdcd1	2.04872	0.00111625
Ccne1	2.04707	9.65295e-06
Ada	2.04231	0.0014224
Klrd1	2.04025	1.91442e-05
Il24	2.03889	4.25421e-06
Tbx21	2.03731	4.75404e-05
C1ra	2.02823	1.07467e-09
S100a4	2.02652	0.000663714
Ptx3	2.02547	0.00197912
Oas1b	2.02382	3.95275e-05
Tnfrsf1b	2.01799	4.91775e-05
Gbp9	2.01782	0.00397059
Ccnb1	2.01166	3.59313e-05
Misp	2.00959	7.25383e-05
Fcgr2b	2.00676	0.000772892
Sh3bp2	2.0063	9.52944e-06
Mcm5	2.00614	2.7016e-05
Cdk1	2.00038	0.000111728
Slc2a6	1.99966	2.34804e-05
Il21r	1.99919	0.00222921
A530032D15Rik	1.99806	1.4072e-05
AI662270	1.99648	0.000120187
Akr1c19	1.99254	2.4121e-07
H2-Q2	1.99196	1.9117e-06
Plekha4	1.98914	1.15439e-05
Mt4	1.98502	0.0351225
Cyth4	1.9842	7.83531e-05
Has1	1.98298	7.08608e-05
Runx3	1.98141	7.22753e-05
Il27	1.97533	0.000215048
Apol7a	1.97173	9.42672e-09
Sap30	1.97171	2.32565e-06
Nampt	1.97123	1.73414e-06
Msln	1.96774	1.40807e-05
Upp1	1.96681	0.00879333
Cd244	1.96661	9.81918e-05
Ear6	1.96366	0.00673184
Isg20	1.96202	6.25931e-05
Mthfd2	1.96153	8.41313e-06
Lrrn4	1.95284	0.00586884
Hpse	1.94866	4.78333e-06
Nmi	1.94856	5.06662e-05
Areg	1.94773	0.000178435
Zeb2os	1.94492	7.25542e-05
Ly6c1	1.94372	1.71715e-05
Fermt3	1.94216	1.09647e-05
Cxcl16	1.94164	1.9117e-06
Plin2	1.94061	1.58066e-06
Sprr3	1.93231	0.0366837
Pbk	1.93076	0.000430478
Cdca5	1.9287	2.56355e-05
Gda	1.92865	2.7114e-06
Tifab	1.92569	0.000176176
Rnf19b	1.92087	5.75888e-05
Csf2rb	1.91853	4.91775e-05
Gpr35	1.91455	2.23528e-05
Slc37a2	1.91454	3.35025e-05
Pilrb1	1.91155	0.00182275
Mcemp1	1.90989	1.59604e-06
Fpr2	1.90891	0.000634531
Parvg	1.90731	6.07559e-06
Rrm2	1.90487	0.000117771
Oas2	1.90144	0.00093349
Cdkn3	1.9	0.000339496
Apol10b	1.89957	0.00246392
Nlrc5	1.89891	0.00202353
Tnfsf8	1.89522	2.35187e-08
Ly9	1.89484	6.06543e-06
Thbs1	1.8948	0.00130008
Sbsn	1.89451	5.27227e-05
Lypd8	1.89333	0.00194454
Asf1b	1.89254	7.9153e-05
Alox5ap	1.8911	9.21337e-06
Hck	1.88977	3.73863e-05
Aurkb	1.88915	0.000102162
Phgdh	1.8858	9.94775e-07
Rtn4rl2	1.88427	9.08064e-05
Spc24	1.88268	2.48437e-05
Pira1	1.8787	0.00133128
Ncoa7	1.87729	5.31695e-07
Sec61g	1.87147	6.99622e-06
Cdca3	1.86721	6.24294e-05
Gpr15	1.86698	2.33571e-05
Rasa4	1.85703	5.16801e-06
Rad51	1.85685	1.35187e-05
Sele	1.85259	0.000110098
Nubp1	1.84925	9.17234e-07
Ivl	1.84583	0.0253133
Eif2ak2	1.84551	0.000162334
Cd302	1.84339	4.49476e-06
Cotl1	1.83784	2.14669e-05
Cnfn	1.83706	0.0430529
Cd8b1	1.83629	0.0237062
Susd3	1.83478	1.23985e-05
Gpr18	1.834	0.00206353
Smpd3	1.82989	2.57833e-05
Fst	1.82805	0.000730292
Birc5	1.8272	0.000244657
Ptger3	1.82601	3.99976e-05
Fam49b	1.82547	9.08015e-06
5430437J10Rik	1.82372	1.96421e-05
Npc2	1.8235	2.97745e-11
Syt12	1.82321	9.49006e-07
Irf9	1.82287	7.43909e-09
Chac1	1.81974	5.47973e-06
Cd47	1.81618	4.60934e-07
Psma7	1.81503	1.2115e-07
Tfpi2	1.81491	0.000187976
Rnh1	1.81346	1.04069e-08
Dnase1l3	1.81273	0.00076062
Ugt1a7c	1.81123	2.53194e-05
Ptpn6	1.81007	0.000661915
Ear12	1.80655	0.000595973
Gsdmd	1.80556	3.1309e-05
Sat1	1.80433	8.20271e-07
Rab20	1.80337	9.88924e-05
Tapbpl	1.80212	8.67031e-05
Nfkbie	1.80105	1.31687e-05
Ctsk	1.80101	0.000169473
Zfas1	1.80013	4.23452e-08
Nme2	1.7986	1.39503e-06
Irf1	1.79474	0.00075284
Tubb6	1.79089	0.000335891
Apobec3	1.78928	3.67321e-05
Selplg	1.78693	0.000127777
Cxcr3	1.78515	0.0067123
Tmem219	1.78445	1.32802e-07
Crct1	1.78389	0.0488996
Calm4	1.78254	0.0238734
Nubp2	1.77979	1.56927e-08
Sp100	1.7796	9.32403e-05
Mxd3	1.77856	0.000550058
Cdt1	1.77784	3.30587e-06
Ssr4	1.77731	2.40336e-07
Ass1	1.776	0.000431486
Bhmt	1.77561	2.64568e-08
Vcpkmt	1.77553	1.78482e-07
Cdh3	1.77448	2.19417e-09
Bst1	1.76922	3.75708e-06
Csf2rb2	1.76439	0.000203432
Grn	1.76298	6.73295e-07
Sla2	1.76243	0.000163023
Cd80	1.76071	3.97698e-06
Stfa1	1.75999	0.00183735
Ctsb	1.75911	5.92215e-07
Lce3a	1.75883	0.0457696
Tmem192	1.75863	2.97315e-07
Il10ra	1.7581	0.000215294
Myc	1.75753	5.03353e-07
Ddx58	1.75703	8.14982e-05
Tdo2	1.75581	0.000312213
Irf8	1.74835	0.000357473
Tnfrsf18	1.74407	0.000665742
Ctps	1.7424	7.07327e-07
Adssl1	1.74134	4.29928e-09
Klra1	1.74068	3.90625e-08
Il18rap	1.74005	0.000584306
Ncf2	1.73934	1.16495e-05
Apol11b	1.73929	0.000340292
Gpr65	1.73547	0.000651997
Il2ra	1.7329	0.000507278
Tnfaip2	1.73044	5.9322e-05
F3	1.72916	6.73948e-06
Dpep2	1.72915	5.72339e-07
Ece2	1.72823	5.04631e-06
Hmga2-ps1	1.72258	1.50702e-05
Upk3b	1.71717	0.0258704
Slfn3	1.71605	0.000336089
Alpl	1.71488	5.9322e-05
Oip5	1.71396	9.51016e-08
Cd200r1	1.71284	5.63139e-05
Lce3f	1.7118	0.047154
Rarres2	1.70913	1.29763e-06
Aldh1a2	1.70718	0.00686222
Ccnb2	1.70427	0.00037602
Ly6e	1.7038	4.03703e-10
Znfx1	1.70329	9.71028e-05
Vav1	1.70237	0.000474916
B4galt5	1.70132	7.11274e-06
Capza2	1.70054	1.12841e-06
Il18	1.6998	6.21825e-07
Sertad1	1.69966	4.43967e-09
Lck	1.69902	0.00347394
Cks1b	1.69817	7.43002e-05
Ube2c	1.6969	0.000613761
C130050O18Rik	1.69522	8.85985e-07
Psma6	1.69192	1.22245e-06
Hcst	1.69084	0.000556303
Lce3b	1.68995	0.0479237
H2-DMb1	1.68671	0.000836727
Serping1	1.6864	1.78482e-07
Tbrg1	1.68588	1.42692e-07
Tapbp	1.68001	7.09143e-05
Ogfr	1.67828	2.40154e-06
Abcb1b	1.67813	2.67963e-05
Lce3c	1.67599	0.0453583
Lap3	1.67207	1.2408e-05
Crlf2	1.66901	1.91442e-05
H2-Q10	1.66882	0.00208826
Stard5	1.66662	1.58187e-07
Mndal	1.66637	0.0046261
Phlda1	1.66464	1.90019e-05
Cd40	1.66237	0.00184199
Ddx39	1.66116	3.0688e-06
Ahcy	1.66054	1.03901e-06
Sh2d2a	1.66027	0.000206833
Slurp1	1.65803	0.0287907
Tor3a	1.65624	1.11097e-07
Tgm3	1.65487	0.0144751
Tlr6	1.65372	1.62595e-05
Rnase6	1.65336	0.000420443
Parp14	1.65177	0.00113017
Myd88	1.65139	4.10281e-05
Litaf	1.64725	1.55955e-05
Tmem213	1.6466	0.009628
Myo1f	1.64575	0.00456072
Metrnl	1.64426	0.000311405
Ptger4	1.64413	8.52798e-05
Bak1	1.64376	0.000103623
Ripk3	1.64145	0.000241856
Arhgap15	1.63998	1.36158e-05
Gm6377	1.63987	5.50727e-07
Laptm5	1.63816	5.51255e-06
Defb4	1.63637	0.0370402
Sfrp1	1.63536	0.000187219
Pmf1	1.63501	1.92335e-08
Dhfr	1.6345	4.65955e-07
Jmjd7	1.63426	7.50367e-07
Cd5l	1.63335	0.0231354
Prm1	1.63194	0.000396654
Tlr1	1.63133	0.000722401
Cxcr6	1.63038	0.0241236
Rfc4	1.6286	3.40231e-06
Gimap7	1.62821	0.00715653
Rnf225	1.62753	5.85644e-05
Parp10	1.62717	0.000433234
Psmd14	1.62644	4.22373e-07
Sin3b	1.62309	4.21232e-06
Adap1	1.62264	0.000148262
Arhgdib	1.61919	0.000274084
Tfec	1.61894	9.35102e-05
Pgf	1.61684	1.51558e-06
Slc23a3	1.61627	4.5333e-07
Dnase2a	1.61597	1.45315e-07
Trip13	1.61429	4.07304e-05
Plat	1.61386	0.00351638
Cenpw	1.61356	2.96972e-06
Mtfr2	1.6117	1.10083e-06
Rgs1	1.61122	0.00244101
Adamts4	1.60845	8.38124e-05
Klre1	1.60754	0.00389849
Gdf2	1.60437	2.58536e-05
Ifi203	1.60336	0.00289047
Arl5c	1.6024	0.000612884
Dctpp1	1.6017	2.68421e-05
Mad2l1	1.6002	2.43912e-05
Rab7b	1.59973	8.27457e-05
Dmkn	1.59815	0.00112977
Aldh1b1	1.59651	0.00203082
Klrb1c	1.59368	4.28732e-05
Rasl11a	1.59303	1.18126e-06
Ctsz	1.58816	7.18897e-06
Lce3e	1.58801	0.036107
Speer4c	1.58583	0.000278052
Klri2	1.58393	3.77855e-08
Ncapg2	1.58336	1.60922e-05
Lif	1.5827	0.000709834
Guca1a	1.58248	1.29177e-05
Kif22	1.58209	0.000953124
Ppfia4	1.57973	3.19191e-05
Platr17	1.57957	9.71219e-05
Hspa1a	1.57956	0.0432534
Sdcbp2	1.57933	0.000148183
Fxyd5	1.57794	1.02137e-05
Zfp593	1.5773	4.61726e-06
Ndufb8	1.57706	5.1119e-05
Gm7609	1.57273	9.08064e-05
5430427O19Rik	1.57239	9.48894e-06
Cxcl1	1.5722	0.00373335
Fam89a	1.56902	1.88595e-05
Eif6	1.56798	6.02336e-07
Neurl3	1.56759	0.00149337
Shcbp1	1.56692	6.44781e-05
Prr15	1.56581	1.07852e-05
Cysrt1	1.56399	0.00787209
Stk26	1.56378	2.55419e-07
Ccdc86	1.5633	3.72011e-05
Fbp2	1.55817	0.000160695
Axl	1.55797	2.17055e-07
Gbgt1	1.55675	0.00570433
Tm4sf5	1.55655	0.0030931
Kcnn4	1.55196	0.000947068
Trim12a	1.55139	7.14731e-05
Pbp2	1.55091	3.63803e-05
Ltb4r1	1.55027	0.0280124
Aunip	1.54761	2.64717e-05
Aprt	1.54613	1.22747e-05
Gch1	1.54341	1.55433e-05
Ifit1bl2	1.54313	6.17489e-06
Casp3	1.54111	4.35187e-05
Bdkrb1	1.53971	0.00187415
Anxa1	1.53933	0.000328881
Klk14	1.53898	0.0159591
Plk1	1.53837	0.00173439
Rfc5	1.53512	3.6874e-06
Hexb	1.53476	4.14497e-05
Actr3	1.53448	2.08723e-05
Tlr7	1.5342	1.0156e-07
Prdx5	1.53385	0.00177868
Ptges	1.533	0.0030916
Gmppb	1.53289	5.079e-05
Tvp23a	1.53263	0.000239538
Cd164l2	1.53223	2.96972e-06
Serpine1	1.53002	6.33583e-05
Pcgf5	1.52995	5.08594e-05
Ppp1ca	1.52885	3.1697e-08
Lgals2	1.52789	0.0456651
Cyp7b1	1.52778	0.00341644
Pnpla7	1.5272	1.68301e-05
Rnf114	1.52583	3.54591e-08
Aurka	1.52517	0.000134361
Psapl1	1.52438	0.00375395
Prpf38a	1.52164	4.28767e-08
Sdc3	1.51753	0.000329093
Ereg	1.51531	0.000437778
Apbb1ip	1.51425	2.42584e-05
Hrh2	1.51329	0.000248364
Tap2	1.50967	2.45849e-05
Cd276	1.50554	0.000194178
D17H6S56E-5	1.5037	3.09842e-05
Snai1	1.50105	2.96453e-05
Coch	1.50041	1.73414e-06
Dok2	1.50033	0.00332797
Tmod1	-1.50078	0.0194615
Gpt	-1.5021	0.00224566
Daam2	-1.50263	0.000882523
Epb41l4b	-1.5049	0.00222937
9330151L19Rik	-1.50627	5.43015e-07
Pitpnm3	-1.50629	1.7712e-06
Iyd	-1.50683	0.00176731
Mir6516	-1.50701	0.00164018
Foxo4	-1.50826	0.000338401
Cela3b	-1.50829	0.0221489
Cfap221	-1.5111	1.90518e-05
Bex2	-1.51537	0.0292717
Egr1	-1.51845	0.00819652
Serf1	-1.52205	0.000171859
Rasgef1a	-1.52311	2.64603e-05
Kifc2	-1.52326	0.0183652
Smarca2	-1.52447	5.90444e-06
Col4a6	-1.52574	1.79763e-05
Dmpk	-1.52677	4.05063e-06
Zfp704	-1.52789	7.82653e-07
Thbs3	-1.52924	1.79763e-05
Ptprm	-1.52926	5.78226e-05
Tsnaxip1	-1.53132	0.000116002
Riiad1	-1.53255	0.00442605
Lrrc71	-1.53377	0.000252266
Mir5107	-1.53387	0.0289748
Slc38a5	-1.53424	0.00199762
Clec11a	-1.5353	0.000164096
Ccdc129	-1.5363	0.00426815
Cat	-1.53646	0.000449735
Pkn3	-1.53939	0.00120001
Morn3	-1.54167	0.00288817
Rab44	-1.54845	3.53482e-05
Wif1	-1.54855	7.14402e-05
Sema3e	-1.5566	7.51124e-05
Scn3b	-1.55752	0.00234467
Plxnb1	-1.55763	2.27781e-05
Hopx	-1.55886	0.000990681
Npnt	-1.56002	8.21636e-05
Gm973	-1.5612	0.00105479
Cep126	-1.56139	0.000171988
Dpysl2	-1.56363	1.10421e-05
Arhgef28	-1.56379	9.84849e-05
Gprasp1	-1.56433	5.34234e-06
Zdhhc14	-1.56539	6.25054e-06
Ackr4	-1.56868	0.000901918
Kit	-1.57428	9.43776e-05
Ccdc114	-1.57496	6.63286e-05
Upk2	-1.57714	0.00307295
Ogn	-1.57792	0.00498364
Six5	-1.578	6.73464e-07
Fhl1	-1.57876	8.59366e-05
Mir6970	-1.57957	0.0106733
Cfap157	-1.57968	0.000387368
Amy2a5	-1.58212	0.0235727
Sik1	-1.58298	0.000938087
Cpa1	-1.58392	0.017071
Zfp692	-1.58447	2.0599e-05
Gm20300	-1.58595	3.1504e-06
Als2cl	-1.58627	4.89453e-05
Ptpru	-1.58809	0.00092352
Tie1	-1.59044	0.000315395
Wfdc1	-1.59889	5.14091e-05
Mir7046	-1.60064	0.000367704
Zfp579	-1.60325	7.34546e-06
Prdm6	-1.60507	3.87794e-06
Cspp1	-1.60565	1.96123e-06
Ankrd50	-1.60857	3.25955e-08
Dhrs7c	-1.60895	0.0454037
Tbc1d30	-1.60934	4.49476e-06
Prpf40b	-1.6099	4.35853e-05
Asgr1	-1.61062	0.00121978
T2	-1.61193	7.39297e-05
Klf4	-1.62175	0.0103814
2810410L24Rik	-1.62252	8.46031e-06
2610507I01Rik	-1.62309	6.95093e-05
Adgrl1	-1.62511	3.58889e-05
Sh3bgr	-1.62566	3.74452e-05
Mycbpap	-1.6266	6.42418e-05
Grem2	-1.62967	1.45119e-05
Ttc21a	-1.63014	0.000587687
Mir568	-1.63037	0.012726
Cpm	-1.63098	0.000533697
Stmn2	-1.63626	0.0066793
Vwa3a	-1.64025	0.000411073
Dock6	-1.64067	0.00151996
Ccdc146	-1.64132	0.000357284
Scgb1c1	-1.64227	0.0098812
Synm	-1.64378	1.39503e-06
Glp1r	-1.64469	0.0340564
Nr4a1	-1.64775	0.000483678
Krtap17-1	-1.64989	0.0383698
Car15	-1.65118	4.52877e-06
Gm11627	-1.65147	0.000113604
Dnali1	-1.65223	0.000953388
Aldh1a1	-1.65444	0.00104267
Efcc1	-1.65603	2.6388e-06
Cfap46	-1.6571	5.47973e-06
Bmp6	-1.6575	0.00111566
Angpt4	-1.66436	7.87107e-08
Cnn1	-1.66728	0.0139817
B430010I23Rik	-1.67068	0.00773398
Maats1	-1.67457	0.000129481
Gdf10	-1.67621	8.45925e-06
Pnliprp1	-1.67686	0.0145955
Scube2	-1.67859	0.00126304
Ddx17	-1.68001	5.42219e-05
Adrb3	-1.6807	4.86419e-05
Iqca	-1.68455	0.000217503
Ttll3	-1.68739	1.36103e-05
Trp53bp2	-1.69165	7.97645e-07
Hist2h3c2	-1.69192	2.21379e-09
Wdr78	-1.69521	0.000268381
Dnah9	-1.70143	2.25864e-06
Sox13	-1.70293	0.000518565
Prss2	-1.70576	0.0194592
Ccdc39	-1.70649	0.000690336
Ttll6	-1.71193	7.67315e-05
Cyp2b10	-1.71612	0.00856655
Stmnd1	-1.719	0.00141363
Myo5c	-1.71916	0.000120476
Dnah5	-1.72178	4.27636e-05
Doc2g	-1.72203	0.00179491
Epas1	-1.72236	0.00571258
Myh11	-1.72435	0.000110482
Mir7036	-1.72702	0.00204402
Kank4	-1.72915	0.000237307
Mesp1	-1.72978	2.55595e-07
Mfap4	-1.73036	0.000268349
Tmem44	-1.73103	4.41288e-05
Dnah10	-1.7321	5.31695e-07
Apln	-1.73477	0.0124563
Slc2a4rg-ps	-1.73752	6.11297e-05
Adcy5	-1.73826	1.80332e-05
Ogt	-1.74333	0.000146028
Hist1h4h	-1.74809	4.69973e-05
Vpreb3	-1.75018	0.00351218
Mapk15	-1.75187	0.000579157
Hepacam2	-1.75248	6.02794e-09
Snora31	-1.75286	0.00166355
Gm20605	-1.75321	0.000358156
Lgals4	-1.75473	0.00659638
Bpifa2	-1.75616	3.93198e-05
Colgalt2	-1.76083	1.82428e-05
Spef1	-1.76612	3.97847e-07
Adamts10	-1.7672	3.10514e-07
Aox3	-1.77147	0.00645931
Hrc	-1.77261	0.024353
Tnnt2	-1.77359	0.0498249
Tymp	-1.77927	5.20645e-05
Fam189a2	-1.78246	0.000174242
Ddx26b	-1.7826	2.42988e-05
Nptx1	-1.78286	0.000217125
Igsf10	-1.79506	3.6889e-08
Fhad1	-1.79787	4.45404e-05
Cytl1	-1.79857	0.0399093
Rsrp1	-1.79938	0.000299163
Wnt10b	-1.80017	2.30325e-05
Hspa4l	-1.81204	1.0156e-07
Ankrd63	-1.81323	0.000250955
Catip	-1.81602	0.000111155
Myh7	-1.81666	1.59925e-05
Vegfa	-1.81758	8.60031e-06
Hspg2	-1.81769	1.39503e-06
Cfap57	-1.82498	8.9942e-05
Tle2	-1.82801	1.59596e-05
Fos	-1.83668	0.000755124
Ciart	-1.84	0.00233178
Chd3	-1.84259	1.65614e-05
Art4	-1.84588	2.52625e-06
1810010H24Rik	-1.84736	0.00134095
Ushbp1	-1.84917	0.00160734
Xlr3a	-1.85107	7.08831e-06
Npr2	-1.85348	1.85069e-05
Dnaic1	-1.86304	4.1428e-05
Ndst1	-1.86391	1.21838e-07
Ccdc180	-1.87594	1.43981e-05
Adamts17	-1.87837	9.05535e-08
Pnlip	-1.88161	0.00629086
Cfap44	-1.88497	2.05693e-05
Igip	-1.88546	2.34804e-05
Pcdh12	-1.88629	0.000162227
Npff	-1.89003	5.12309e-05
Lrat	-1.89082	0.00124914
Cdh13	-1.895	1.13532e-05
Srsf5	-1.90066	3.08693e-05
Palmd	-1.90238	1.36918e-05
Prickle1	-1.90506	5.75237e-07
Ak7	-1.90511	6.65993e-05
Ccdc162	-1.91291	4.48009e-05
C2cd4b	-1.91392	2.27443e-05
Try4	-1.91868	0.00673184
Car14	-1.92626	7.27672e-05
Igfbp3	-1.92829	0.00308279
Pax5	-1.93701	7.72569e-05
Tspan2	-1.94489	0.000369316
Drc1	-1.94634	5.93523e-05
9630028I04Rik	-1.94723	8.56158e-06
1810019D21Rik	-1.94727	1.98299e-06
Cfap43	-1.94905	0.000125969
Wnt3a	-1.95371	0.000234848
Tmem100	-1.9569	0.000580277
Snord100	-1.96089	0.000835214
Lhb	-1.96235	0.000110863
Tbx3	-1.96856	1.86144e-05
Igfbp2	-1.98281	0.00367241
Limch1	-1.98753	4.1428e-05
Mapt	-2.00577	2.43887e-06
Macf1	-2.01207	7.53917e-06
Rasgrf2	-2.01286	9.95795e-07
Klf2	-2.01658	1.27701e-05
Snhg11	-2.01801	0.000231254
Fcrls	-2.02685	4.88014e-06
Mamdc2	-2.05044	3.90037e-05
Gsta2	-2.05193	0.00187374
Scgb3a2	-2.06322	0.00490446
Hc	-2.06749	0.0039774
Ces1e	-2.06757	0.000113604
Edn3	-2.07368	8.14974e-07
Mir7052	-2.07468	0.00097735
Cbr2	-2.07663	0.000189418
Ltbp4	-2.08057	3.65059e-05
Itga8	-2.08091	1.21538e-05
Mir145a	-2.08616	3.78727e-05
Hsph1	-2.10026	2.40513e-07
1700007K13Rik	-2.10085	2.79091e-05
Atp6v1b1	-2.10629	0.00143201
Pnisr	-2.10786	4.58632e-06
Scd2	-2.11681	2.35618e-05
Wscd1	-2.11966	2.55025e-05
Col4a3	-2.13184	0.00111256
Fgf1	-2.13293	2.50238e-05
Leng8	-2.14476	0.000240221
Tspan18	-2.15193	0.0027454
Gstm1	-2.16575	0.000260394
2210011C24Rik	-2.16801	3.46338e-05
Aox1	-2.19016	2.55595e-07
Dusp1	-2.19865	0.000191173
Ccdc17	-2.20142	5.90211e-05
Wdr63	-2.22152	5.55915e-06
Fgfr4	-2.22215	7.49953e-06
Pde5a	-2.22329	1.72088e-06
Cfap100	-2.23228	1.0572e-05
Pisd-ps2	-2.23572	8.68869e-05
Slc4a5	-2.25496	3.80898e-07
Cela2a	-2.25959	0.00359652
Pon1	-2.2625	0.00626956
Sec14l3	-2.26717	2.79541e-05
Dnah6	-2.26953	6.81334e-07
Nrbp2	-2.27489	5.37376e-05
Mir6935	-2.27858	2.27265e-05
Cdc42bpg	-2.28235	3.66263e-05
Malat1	-2.28557	0.000111927
Klhdc8b	-2.29532	1.96123e-06
Tril	-2.31673	4.79889e-08
Lama3	-2.32874	5.72339e-07
Ckmt2	-2.36716	0.0231878
Myh14	-2.37276	5.41587e-06
Akap5	-2.38772	1.16492e-05
Cyp2f2	-2.39861	0.00105062
8430408G22Rik	-2.42288	0.000402545
E030019B13Rik	-2.44561	4.43787e-06
Fabp1	-2.45857	9.43776e-05
Cped1	-2.46661	4.1441e-05
Firre	-2.46928	9.63305e-05
Ccdc108	-2.47653	3.27558e-05
Slc7a10	-2.47812	3.28179e-05
Hist1h1e	-2.48228	3.00549e-07
Pisd-ps1	-2.4855	2.21201e-05
Mgl2	-2.48553	1.87286e-07
Ctrb1	-2.49725	0.00342431
Actc1	-2.50115	0.00507873
Pcolce2	-2.50962	4.89461e-06
Fam193b	-2.56893	1.44139e-05
Npr3	-2.57872	0.000275749
Aplnr	-2.63662	0.000108061
Pdzd2	-2.64168	7.34123e-06
Snhg20	-2.6539	5.12947e-05
1810011O10Rik	-2.68013	2.99303e-09
Scn7a	-2.68995	2.95969e-07
Ces1f	-2.69076	0.000515373
Erdr1	-2.76641	0.000208285
Ces1g	-2.93263	4.68725e-07
Cd209a	-2.9357	3.97847e-07
Rgs11	-2.93631	4.54108e-06
Carmn	-2.93952	2.21102e-08
Myh6	-3.07441	0.00705
Neat1	-3.18401	0.00105462
Colq	-3.22979	2.25392e-06
Fendrr	-3.29298	2.68026e-05
Rtkn2	-3.45094	1.85492e-05
Ccl21a	-3.82695	0.0193586
Cyp1a1	-3.83745	5.51861e-07

## Sheet: STable8. Delta 6dpi
GeneID	Log2 Fold Change	FDR Value
Cxcl10	5.98855	1.65804e-06
Cxcl9	5.68585	2.83148e-07
Irf7	5.03757	1.61945e-12
Ubd	4.85315	1.21251e-06
Il1r2	4.8017	3.01327e-05
Gm12250	4.62465	1.12614e-06
Tgtp1	4.51212	1.21074e-07
Iigp1	4.48527	1.03958e-07
Saa3	4.47316	4.37569e-05
Igtp	4.45137	2.80512e-08
Irgm1	4.31534	8.99693e-09
Fcgr4	4.312	3.72842e-07
Zbp1	4.23207	3.65088e-07
Rsad2	4.2226	2.17549e-06
Ear6	4.21599	5.68811e-07
Oas3	4.2008	2.25784e-08
AA467197	4.1527	5.56076e-05
Tat	4.14745	0.000158094
Arg1	4.12154	0.000108139
Gbp2	4.07714	9.27891e-06
Cd274	4.05939	2.09786e-07
Gzmb	3.96077	0.000134629
Il18bp	3.9296	1.20542e-07
Gpnmb	3.8965	8.276e-07
Sprr1a	3.88825	8.06617e-06
Gbp5	3.75705	1.0862e-05
Serpina3g	3.75171	9.25444e-06
Pla1a	3.71904	4.3886e-08
Isg15	3.71779	7.09213e-06
Tgtp2	3.71562	1.12614e-06
Gbp10	3.67806	9.34946e-06
Ifi204	3.65908	4.01678e-05
Ifit2	3.65379	8.40648e-06
Gbp6	3.5933	6.69322e-06
Serpina3f	3.59305	7.76181e-05
Ifit3	3.5855	5.2813e-09
Acod1	3.57606	1.14604e-05
Trem2	3.5718	1.00691e-05
Fkbp5	3.53387	6.09702e-05
Ly6i	3.51351	7.95425e-06
Cldn4	3.46782	4.97132e-06
Chil3	3.46668	5.68811e-07
Ms4a6d	3.45338	4.02782e-06
Cd300lf	3.39045	5.56491e-08
Ccl2	3.38228	0.00202524
Wfdc17	3.36106	0.000201566
Ifi47	3.3362	9.81621e-06
Gm4841	3.32762	2.7689e-06
Arg2	3.30096	1.12614e-06
Apol9a	3.26903	1.75189e-07
Tmem37	3.24951	2.142e-07
Tap1	3.24759	2.37767e-08
Tarm1	3.22144	4.20647e-05
Tigit	3.22107	1.31306e-06
Ifit1	3.21959	1.53219e-07
Ctss	3.20575	3.64301e-08
Cfb	3.16624	2.29204e-06
Ifit3b	3.15552	3.03489e-07
Ms4a6c	3.14988	1.12614e-06
C1qb	3.14955	1.21074e-07
Serpina3m	3.10702	9.72136e-05
Ccl4	3.10646	0.000729188
Fam26f	3.10209	0.00104572
Serpinb9b	3.09733	6.42216e-08
Lilr4b	3.09104	2.3012e-06
Galnt15	3.08263	0.000233923
Oasl1	3.0796	0.000466246
Retnlg	3.07935	0.00235588
Fcgr1	3.07796	0.00029543
Gbp3	3.06573	7.14608e-06
Lilrb4a	3.01423	3.22354e-06
Rpl26	3.0064	0.0118053
Mx1	2.97105	8.33096e-05
Gm11127	2.96179	1.16793e-05
H2-Q9	2.96094	0.000159864
Ifng	2.92982	0.00066405
Lcn2	2.92121	1.01275e-06
S100a8	2.91622	0.00968982
Pla2g7	2.90166	1.28005e-05
Retnla	2.89131	0.000115749
Apol9b	2.88688	5.09476e-07
Mnda	2.87848	0.0006561
Ly6c2	2.87223	5.65112e-06
Oas1g	2.86385	4.1099e-05
Tgfbi	2.86028	1.99321e-05
Batf2	2.84982	0.000117152
Apoc2	2.84742	4.52218e-05
Orm1	2.84421	5.03995e-06
Ms4a4a	2.84337	4.00429e-07
Mmp8	2.84094	0.000209911
Doc2b	2.80412	0.00298966
Lrrc25	2.78395	0.000105345
Slc7a5	2.76928	3.15611e-12
Slfn4	2.76735	0.00452874
LOC100038947	2.76506	6.96295e-06
Chil4	2.7557	0.000931731
Gm4951	2.7515	1.30004e-05
H2-T23	2.74326	7.32576e-12
Pdcd1	2.73126	5.56008e-05
Siglec1	2.73088	1.76128e-06
Cyp4f18	2.71036	3.31796e-07
Trex1	2.70523	3.21393e-06
Rbm3	2.69413	1.41657e-07
Oas1a	2.67918	0.000161662
Clec4e	2.66732	5.16156e-05
Pak6	2.66545	2.40435e-06
Cd68	2.6649	7.39315e-08
Ifi205	2.66402	0.00202499
Gzmk	2.65972	0.000884842
Ctsh	2.64529	5.68811e-07
H2-T9	2.62489	1.46829e-09
Socs1	2.62239	0.00315674
S100a9	2.62071	0.0194008
Zbtb16	2.61932	0.00737087
Tlr13	2.59814	1.43184e-06
E130102H24Rik	2.59693	0.00316599
Mpeg1	2.58381	2.142e-07
Pim1	2.56679	1.23307e-05
Rasl10b	2.56518	8.82694e-05
Serpina3n	2.55662	5.89337e-06
Msr1	2.55465	5.44564e-05
Hmga1-rs1	2.55127	4.50809e-06
C1qa	2.5381	5.81791e-06
Tnfrsf12a	2.52274	1.33174e-06
Slc15a3	2.5161	3.92026e-05
Slfn1	2.51231	0.00109603
C1qc	2.50295	5.06327e-06
F830016B08Rik	2.498	1.82999e-06
Cirbp	2.48965	1.51768e-05
Irgm2	2.48623	2.26795e-06
H2-Q4	2.47575	7.07072e-12
Ctla4	2.47087	5.48481e-05
Phgr1	2.47053	0.000504682
Dhx58	2.45763	0.000141414
Olfr56	2.44643	1.32835e-05
Il1b	2.42856	0.0277945
Lgals3bp	2.42305	6.40316e-08
AI607873	2.41055	4.18355e-05
Mt2	2.40389	0.00205228
Ccr1	2.39723	0.00124244
Psmb8	2.39352	2.84264e-06
Asprv1	2.39102	0.033549
Tacstd2	2.38053	1.30109e-07
H2-K1	2.37942	1.61945e-12
Apol6	2.37689	5.61469e-05
Ear3	2.37392	0.000627607
Rab20	2.36551	4.37284e-06
Prss22	2.35867	3.85052e-05
Fcgr3	2.35649	4.37569e-05
H2-Q8	2.35478	1.47217e-08
Pmvk	2.34271	5.56076e-05
Sirpb1a	2.33969	6.61952e-05
Rnf19b	2.33867	7.10012e-06
Gm13363	2.33837	0.0439287
H2-Q1	2.33745	1.51616e-10
H2-Q6	2.33486	8.99693e-09
Ifi27l2a	2.33258	6.03248e-05
Ms4a8a	2.33182	1.30109e-07
Tnfrsf9	2.32476	4.67677e-05
Tnip3	2.32259	9.28208e-06
H2-Q2	2.31835	3.33841e-07
Rtn4rl2	2.30677	9.01153e-06
Aif1	2.30562	0.00197529
Slc11a1	2.30545	0.000150567
Stfa2l1	2.29714	0.0174297
Gbp11	2.29195	1.50128e-05
H2-L	2.28789	1.23713e-08
Ngp	2.28198	0.0470062
Sh3d21	2.27702	0.000481443
S100a14	2.25613	0.000521647
Psca	2.25403	3.0636e-05
H2-D1	2.25392	2.39522e-12
Rtp4	2.25345	1.98063e-06
Themis2	2.25033	0.000447245
Tyrobp	2.24497	6.91027e-06
Lag3	2.24339	0.000108113
Ccl3	2.24209	0.0033336
Cd300c2	2.22899	5.35604e-06
Gbp4	2.22158	0.0067398
C3ar1	2.22048	0.00258193
Rgcc	2.21997	0.00131008
Il2rb	2.2168	0.0010412
Gatm	2.21588	0.00678104
Ly6c1	2.21556	4.91211e-06
Clca3a1	2.21154	2.52245e-05
Cybb	2.20765	3.79782e-05
Socs3	2.20587	0.000141349
Clec7a	2.20315	0.000258128
Sirpb1b	2.20166	5.37868e-05
Oasl2	2.19864	0.000274735
Spi1	2.19505	1.518e-05
Csf2rb	2.19422	1.31331e-05
Mir27a	2.19296	0.00145717
Pirb	2.19215	0.000317825
Nlrc5	2.18913	0.00070126
Ccr5	2.18629	0.0124652
Slfn2	2.18026	0.000125486
Xdh	2.17627	1.43036e-05
Myrip	2.15722	0.0249072
Mir22hg	2.1558	0.00121911
Psmb9	2.15546	1.84486e-05
Cdkn1a	2.15527	0.00205203
Fkbp1b	2.15476	4.39487e-06
Ctse	2.14768	6.33969e-06
Fcer1g	2.14185	6.45522e-05
Tgm1	2.14182	5.68811e-07
Fst	2.13648	0.000194785
Slamf8	2.13467	0.0259011
Gbp8	2.12393	0.00307297
Irf1	2.12241	0.000185144
Pstpip1	2.12076	0.000134666
Tbxas1	2.11955	8.84883e-05
Slc39a2	2.11323	4.53761e-06
Ifitm6	2.09826	0.0470062
Slc26a4	2.0937	0.00564412
Ucp1	2.09073	0.0122037
Il12rb1	2.08896	0.00027118
Spp1	2.08876	0.00100443
Icos	2.08718	0.00066205
Samhd1	2.08395	1.00521e-06
Tinagl1	2.08155	4.9211e-07
Ms4a6b	2.06273	0.00134352
Trafd1	2.06252	1.18248e-05
Cxcl13	2.06054	0.00775965
Gm5431	2.059	0.000466059
Trem1	2.05231	0.000331575
Ccl8	2.04997	0.023964
Csf2rb2	2.03665	5.16156e-05
Gpr157	2.03347	3.82878e-05
Usp18	2.03039	0.000511595
AW112010	2.02583	0.000684034
Bcar3	2.02492	0.00119531
H2-Q5	2.02201	2.04768e-06
Tnfrsf4	2.01811	0.000150567
Scnn1a	2.01088	0.000121061
H2-Q7	2.00227	4.37569e-05
Cxcl2	1.9934	0.0373803
H2-T22	1.9886	4.3886e-08
Akr1c14	1.98639	0.0122734
Klhdc8a	1.98626	5.79536e-06
Ido1	1.98578	0.00980865
AB124611	1.97923	0.00107559
Hsd11b2	1.97888	0.000112441
Pnpla2	1.97858	8.73302e-05
Cd276	1.97678	7.93493e-06
Hcls1	1.97296	0.000173865
Jchain	1.96773	0.0427032
Ms4a7	1.96714	0.00254419
Mir23a	1.96496	0.00478752
Adssl1	1.96098	1.17102e-09
Cotl1	1.95637	1.54398e-05
Atf3	1.95444	0.00018268
Rgs16	1.95344	0.000217034
Zc3h12a	1.95261	5.70235e-06
Sla	1.95147	2.49913e-05
Xaf1	1.9512	1.50526e-05
Rhof	1.95005	9.01674e-06
Lcp2	1.9417	0.00115891
Lgmn	1.94089	1.3002e-05
Fcgr2b	1.9399	0.0016905
Plac8	1.93935	0.012415
Sesn2	1.93235	6.9225e-06
Adap2	1.93194	0.00218999
Apod	1.928	0.00538358
Igsf6	1.9245	0.000665235
B2m	1.92373	1.46829e-09
Mapk13	1.92092	9.01153e-06
Pld4	1.91843	5.33029e-05
Runx3	1.91395	0.000190872
H2-T-ps	1.90709	1.21074e-07
Gramd2	1.90522	2.19483e-05
Ugt1a7c	1.89805	2.31538e-05
Dpep2	1.89271	2.92245e-07
Rnf149	1.88782	1.30449e-05
Chaf1b	1.8851	2.28152e-06
Tnfaip2	1.88393	3.34986e-05
Emilin2	1.87766	8.93358e-05
Phf11d	1.87709	0.000887495
Anxa1	1.87611	4.94021e-05
Ddit4	1.87479	0.0226423
Msln	1.87304	4.75259e-05
Cd33	1.86712	1.09838e-05
Timp1	1.86677	0.020619
Arl11	1.86483	0.000107073
Dtx3l	1.86475	0.000212319
E230013L22Rik	1.86466	2.81219e-06
Itgb2	1.86222	0.000136051
Aoah	1.86071	0.00534734
Slc7a8	1.85993	0.00181602
Mcemp1	1.8548	5.27525e-06
Lgals3	1.85047	3.96912e-06
Map3k6	1.85007	0.0287484
Alox12e	1.84971	0.00170748
Wars	1.84373	8.72136e-05
Soat2	1.83855	7.88229e-05
Parvg	1.8271	2.16193e-05
Prmt8	1.82627	0.00240723
Xcl1	1.8245	0.0470062
Lpxn	1.82393	0.000706008
Tnfrsf1b	1.82388	0.000284056
Sectm1a	1.82256	0.00295421
Alox5ap	1.82172	2.75676e-05
Scarletltr	1.82148	0.00976937
Cd8b1	1.81965	0.0326036
Wfdc21	1.81525	0.00399948
Nfil3	1.81235	0.000201566
F3	1.81196	6.33969e-06
Txnip	1.81022	0.00329131
Mt1	1.80697	0.00941157
Cd164l2	1.80558	4.15979e-07
Gda	1.80312	1.46405e-05
Rasa4	1.80245	1.50128e-05
Havcr2	1.80015	6.43413e-05
Gm15133	1.79015	2.05303e-06
Sh2d1b1	1.79002	1.51232e-05
Parp9	1.78342	6.23151e-05
Mir5132	1.78214	0.000339918
Cd84	1.78018	5.57054e-06
Phf11a	1.77895	0.0161036
Ctsd	1.77895	5.3113e-06
Sphk1	1.77701	0.00202524
Tatdn2	1.77682	2.29204e-06
Tbc1d2	1.7757	3.21393e-06
Gpr141	1.77509	0.00258193
Fermt3	1.76892	6.62235e-05
Sh2d2a	1.7659	0.000158549
Foxo3	1.76535	0.00140236
Sp140	1.75945	5.70786e-05
Ctsw	1.75087	0.0117987
Pik3ap1	1.7504	0.00451885
Lgals9	1.74975	0.000134915
Stat2	1.7451	0.00042625
Per1	1.74452	0.0055206
Tnf	1.74365	0.000110027
Tmem86a	1.74156	3.92698e-05
Acp5	1.74141	0.000235347
Daxx	1.74003	0.000684034
Stat1	1.73918	0.0043393
Apobec1	1.73754	2.54515e-05
Ssh1	1.7353	8.46696e-05
Parp10	1.73391	0.000331925
Slfn3	1.73272	0.000489253
Pard6b	1.73157	0.000912011
I830077J02Rik	1.72789	0.00392888
Cdkn2b	1.72716	0.000340642
Laptm5	1.72709	4.86553e-06
Slfn8	1.72628	0.00851581
Tlr2	1.72566	0.000546073
Cd3e	1.72509	0.0134349
Cd3d	1.71945	0.0193387
Selplg	1.71709	0.000331587
Plek	1.71456	0.000277662
Ch25h	1.7128	0.00411177
Ifi27l2b	1.70991	0.000288898
2810417H13Rik	1.70834	0.00107542
Clec4d	1.70754	0.00418439
Ear12	1.70586	0.00172087
H2-Q10	1.7053	0.00256197
Ifi44	1.70224	0.0079991
Gjb4	1.70034	3.82878e-05
Krt18	1.69915	2.26628e-05
Sfn	1.69477	0.000344311
Apoe	1.69403	0.000356979
Smpdl3b	1.69349	0.00145717
Fxyd5	1.69271	6.73949e-06
B430306N03Rik	1.69255	0.00110798
Cd6	1.68911	0.00227705
Nuak2	1.6834	1.01275e-06
Itgam	1.6831	0.00235539
Krt7	1.68106	6.56187e-06
Sh3bp2	1.67987	0.000195211
Lrrc29	1.67244	2.89665e-05
Sit1	1.67068	0.000748603
Fbp2	1.67002	0.000113046
Klf10	1.66776	5.20836e-05
Thbs1	1.66245	0.00617965
Gbp7	1.66165	0.00270701
Was	1.65946	0.000433401
Hcst	1.65944	0.00107559
Fgr	1.65684	0.00977244
Il4ra	1.65401	0.0006338
Clec4n	1.6485	0.00111568
Ly6g	1.64349	0.0217836
Gins2	1.64252	0.00155964
Tk1	1.63889	0.000868431
Krt8	1.63782	8.81327e-05
Hk3	1.6377	0.00592768
Snx10	1.63614	0.000212766
Sin3b	1.63574	7.08275e-06
Cyth4	1.6325	0.00119163
Gzmc	1.63133	0.00672816
Tox2	1.62976	0.0144525
Tifa	1.62723	0.00239682
Slc6a14	1.62623	0.000887495
Csf3r	1.6253	0.00794847
2410006H16Rik	1.62284	4.86657e-05
Ncf4	1.62155	0.00446198
Mir7005	1.6173	0.0101016
Cd300a	1.61588	0.000287074
Grina	1.6142	1.91097e-06
Lat	1.61237	0.0122683
Pbp2	1.61154	3.85052e-05
Mxd1	1.61084	0.000345288
Cdca3	1.60232	0.000677952
Syt12	1.60021	1.50526e-05
Cyba	1.59974	0.000226351
Kcnk1	1.59777	0.000236476
Phf11b	1.59589	0.0183422
Ptpn22	1.59527	0.000865503
F7	1.59413	0.000409134
Sectm1b	1.59352	0.00642868
Nhlrc3	1.5929	1.09644e-05
Ptafr	1.5928	0.0134809
1810062G17Rik	1.59278	5.20836e-05
Misp	1.59209	0.00174265
Sema4d	1.59033	0.00227035
Gm5483	1.58842	0.0470062
Cdt1	1.58592	3.48407e-05
Tmem120a	1.58427	8.05075e-06
Il18rap	1.58227	0.00246501
Serpina3i	1.58217	0.00396651
Dnase2a	1.58199	5.67711e-07
2200002D01Rik	1.58124	0.000469293
Ube2l6	1.57869	0.00389727
Bst2	1.57325	0.000550597
H2-M3	1.57321	2.89665e-05
Klf3	1.5726	0.00107913
Clec5a	1.56669	0.000945519
Tapbp	1.56615	0.000273293
Cxcr3	1.56594	0.0234203
E030018B13Rik	1.56265	0.000316467
Plat	1.56104	0.00666546
Myc	1.56101	7.621e-06
F10	1.55997	0.0110578
Klhl6	1.55975	0.000429314
Slc2a6	1.55935	0.000891169
Cd180	1.55838	0.0270233
Pira2	1.55719	0.00149287
Il2ra	1.55294	0.00240723
Trem3	1.5514	0.0262159
Flywch2	1.55134	3.69955e-06
Relt	1.55076	3.91717e-05
Mafb	1.54943	0.00513824
Nfkbie	1.5481	0.00018136
H2-DMb1	1.54629	0.0029539
Ucp2	1.5437	0.00115137
Il1rn	1.54352	0.0405291
Ppa1	1.54226	0.00218999
Tmem213	1.5394	0.0209077
Ccne1	1.53915	0.000695894
Pnpla7	1.53477	2.77016e-05
Cmpk2	1.53239	0.0181791
C5ar1	1.53188	0.00154789
Ccnb1	1.53041	0.00164734
Sowahb	1.52999	1.61126e-05
Lox	1.52981	0.0188323
Mlkl	1.52881	0.0122994
Adm2	1.52648	1.21074e-07
Glipr2	1.52548	0.0004269
Cxcr2	1.52465	0.0255336
Fosl2	1.52153	0.000266861
Orm2	1.52039	0.000555118
Tnfaip8l2	1.52017	0.00293121
Mylip	1.51674	0.0127839
Cd52	1.51304	0.0135126
Ddx60	1.51294	0.00288894
Sesn3	1.51251	5.90969e-05
Gm5424	1.51125	0.0170815
Ada	1.50908	0.0236988
Arid5a	1.50905	2.16193e-05
Itga1	-1.50257	0.000889352
E030013I19Rik	-1.50352	2.00024e-08
Tcf21	-1.50439	0.000374403
2310009A05Rik	-1.50576	0.000223219
Cpa1	-1.5061	0.0318686
Gm14207	-1.51067	0.000132772
Hist2h3c2	-1.51072	1.21342e-07
Proca1	-1.51637	1.99499e-06
Hist2h2be	-1.51751	2.81046e-07
Hey1	-1.51789	0.00227035
Socs5	-1.51849	2.3947e-05
Sost	-1.5187	0.000112441
Fam129c	-1.51925	0.000156705
Mfap5	-1.52107	0.000155338
Wisp2	-1.52356	0.000875868
Ripply3	-1.52446	0.00206684
Itga8	-1.52589	0.00101075
Asgr1	-1.52829	0.00308283
Mettl24	-1.53412	2.73487e-06
Amy2a5	-1.54841	0.0345225
Adrb3	-1.54969	0.000273293
Snora70	-1.55153	0.00188433
Rptn	-1.55242	0.0264885
Egr1	-1.55335	0.00965162
Gm20300	-1.55562	8.1957e-06
Mns1	-1.55867	0.00509334
Ncbp2	-1.56663	3.68534e-05
Lbx2	-1.56672	7.72712e-07
Vsnl1	-1.56727	0.0202559
Gm11627	-1.56841	0.000363435
Zfp760	-1.57029	5.09554e-06
Bcl6b	-1.57601	0.000469268
Grem2	-1.5763	4.09199e-05
Impdh1	-1.57777	2.24517e-05
Emcn	-1.58041	2.02453e-06
H2-Ob	-1.58137	0.000520899
Vtn	-1.58293	0.000617038
Wnt10b	-1.58831	0.000240644
Hilpda	-1.58996	2.60415e-05
Pitpnc1	-1.59835	2.19269e-05
Ahsa2	-1.59882	1.31639e-09
1700007K13Rik	-1.59952	0.00121855
A330009N23Rik	-1.60578	4.52218e-05
Acoxl	-1.60667	0.00578156
Ift80	-1.60704	2.37958e-06
Six5	-1.60961	1.12614e-06
Ddx17	-1.61164	0.000156705
Sod3	-1.61445	5.27525e-06
Prdm8	-1.61887	2.83105e-07
Fam181b	-1.62777	3.22354e-06
Angpt4	-1.63089	3.31796e-07
Pcdh18	-1.64502	9.15389e-05
Mapt	-1.64529	0.000106125
C2cd4b	-1.64671	0.000283019
Hdhd3	-1.64952	0.00275162
Arap3	-1.65353	0.000296075
Fgfr4	-1.65653	0.000697892
Rtkn2	-1.65668	0.0309903
Ppp1r16b	-1.66233	1.32225e-05
Cd209f	-1.66962	0.000247933
St6galnac3	-1.67107	1.12181e-06
Sh3tc2	-1.67173	0.000276405
Fendrr	-1.6725	0.0296467
Acta2	-1.67506	0.00031827
Nxpe4	-1.67652	9.25444e-06
Hpcal4	-1.67776	0.0268409
Pnliprp1	-1.68311	0.0178377
Clec1a	-1.69024	0.000773975
Igsf10	-1.69296	4.09947e-07
Hist1h1e	-1.69477	0.000664635
Synm	-1.69956	1.16671e-06
Wdr78	-1.70327	0.000409134
Col15a1	-1.71178	0.000158549
Myl1	-1.71363	0.0470062
Kitl	-1.7159	1.34351e-06
Rbp7	-1.72037	0.0289151
Prickle1	-1.72588	6.17467e-06
Ogt	-1.72982	0.000267365
Stmn2	-1.73201	0.00615288
Cd207	-1.73492	7.55182e-07
Scgb1c1	-1.74451	0.00879945
Spns2	-1.74998	1.86505e-06
Pcyox1l	-1.75302	1.91097e-06
Klre1	-1.75859	0.00034261
Slc2a4rg-ps	-1.76119	6.75324e-05
Cd93	-1.76366	6.07028e-05
Asb2	-1.76386	0.000212319
Prss2	-1.76835	0.0193387
9230117E06Rik	-1.77032	0.00015001
Fmo1	-1.77932	0.00218999
Rprml	-1.78191	0.000250793
Meis1	-1.79853	7.6603e-07
Meox1	-1.81049	2.47438e-06
Ankrd63	-1.81549	0.000326405
Pkn3	-1.82467	0.000289485
Hepacam2	-1.82696	5.12902e-09
Il33	-1.82957	0.00132863
Chst7	-1.83421	1.21074e-07
Pcolce2	-1.84209	0.000535505
Pnlip	-1.84229	0.0103797
Xlr3a	-1.84796	1.18425e-05
Myl9	-1.85598	1.04986e-05
Mettl3	-1.86759	4.18967e-05
Gap43	-1.86997	0.000406222
Arhgef15	-1.87044	0.000258165
Casq2	-1.87678	0.0386896
Try4	-1.87935	0.0109905
Tnnc1	-1.88325	0.0443836
Sox7	-1.88678	5.24099e-05
Spib	-1.88719	0.00156198
Trmt1l	-1.8901	5.21771e-05
Fcrls	-1.9074	2.30187e-05
Dll4	-1.91354	0.000538027
Rnase1	-1.91409	0.0021102
Sh3bgr	-1.91785	5.81791e-06
2610507I01Rik	-1.92398	1.18839e-05
Slc38a5	-1.92486	0.000285786
Rnf144a	-1.92526	9.61973e-07
Dleu2	-1.93209	5.68811e-07
Acsm1	-1.93935	0.000532528
Tbxa2r	-1.95454	2.9931e-06
Serf1	-1.96843	9.827e-06
Ddah1	-1.96986	7.07994e-07
Sox18	-1.98548	0.00221802
Ppbp	-1.98723	0.00144352
Nat8f3	-1.99336	6.42216e-08
Thbd	-2.01052	8.49944e-05
Nat8f7	-2.03398	3.27968e-09
Carmn	-2.03913	7.90667e-05
Clec3b	-2.04251	2.87029e-05
Glp1r	-2.04979	0.0108058
Clec11a	-2.05425	5.35604e-06
Pde5a	-2.06662	1.06275e-05
Tspan13	-2.06887	1.30109e-07
Chordc1	-2.06895	8.26525e-07
Disp2	-2.08062	0.000118634
Nptx1	-2.09206	1.43766e-05
Actg2	-2.09207	0.000568169
Serpinh1	-2.10386	6.56187e-06
Aard	-2.10545	5.00816e-06
Ces1g	-2.13114	0.000468313
Lrat	-2.13622	0.000469293
Wscd1	-2.15456	3.63897e-05
Kit	-2.15726	2.02486e-06
Myl4	-2.16571	0.0485165
Cela2a	-2.17132	0.00778888
Cox7a1	-2.17754	0.0156686
Kank4	-2.18386	9.85303e-06
Ctrb1	-2.19029	0.0173222
Ly6d	-2.19964	0.00525696
Tril	-2.2066	3.41349e-07
Myct1	-2.21373	2.02486e-06
Kctd21	-2.21505	0.000124826
Wfdc1	-2.21636	7.44207e-07
Fam162b	-2.22147	3.2416e-06
1810011O10Rik	-2.2319	2.81046e-07
Mir6935	-2.25521	4.55776e-05
Cd19	-2.25923	0.000388808
Cd79a	-2.26525	0.000297478
Fcmr	-2.27791	0.000488449
Igip	-2.30203	1.78267e-06
Hba-a2	-2.32326	0.0422548
Cnn1	-2.36426	0.00106025
Bpifa2	-2.37114	1.12184e-07
Calcrl	-2.39396	0.000110538
Ms4a1	-2.41217	0.000213038
Rasgrp3	-2.42193	6.56187e-06
Rtp3	-2.43763	1.4084e-06
Ushbp1	-2.45819	0.000110843
Gja5	-2.46537	3.2634e-05
Pax5	-2.46792	2.50184e-06
Tubb4a	-2.48107	0.00143014
Ckm	-2.50333	0.0481775
Mgl2	-2.50703	4.1311e-07
Actc1	-2.52031	0.00684016
Ackr4	-2.54824	1.21074e-07
Scn3b	-2.57655	5.80437e-06
Fam101a	-2.60811	7.3833e-08
Mb	-2.62297	0.0470062
Ces1f	-2.69694	0.000794589
Scn7a	-2.75251	5.21992e-07
Hsph1	-2.76161	4.23923e-09
Slc7a10	-2.81452	8.28099e-06
Pcdh12	-2.83553	4.75978e-07
Hc	-2.91026	0.000168809
Fabp1	-2.94761	1.18425e-05
Spon2	-2.98978	1.18771e-05
Colq	-3.1096	9.85303e-06
B430010I23Rik	-3.33475	2.26795e-06
Cd209a	-3.35845	1.17358e-08
Aplnr	-3.55169	2.66469e-06
Ccl21a	-3.7899	0.0303099
Apln	-4.16268	1.75189e-07
Cyp1a1	-4.20401	6.40316e-08

## Sheet: STable9. Omicron 3dpi
GeneID	Log2 Fold Change	FDR Value
Irf7	5.00974	5.08881e-11
Cxcl10	4.90008	0.000755485
Rsad2	4.0719	0.000112001
Ifit3	3.74545	3.68446e-08
Ly6i	3.72729	0.000104055
Zbp1	3.70302	8.65688e-05
Ifit3b	3.67492	4.34961e-07
Isg15	3.54537	0.000504287
Gm12250	3.48036	0.00187946
Ifit1	3.2925	1.92886e-06
Oasl1	3.29051	0.00548926
Irgm1	3.25478	2.97368e-05
Oas3	3.21105	9.20158e-05
Apol9a	3.20307	5.68227e-06
Tgtp1	3.19453	0.00061508
Apod	3.16754	0.000586139
Apol9b	3.14423	1.86375e-06
Igtp	2.99199	0.000453733
Ifi27l2a	2.95654	8.80691e-05
Cd274	2.95397	0.000721246
Iigp1	2.88481	0.00179211
Ifi47	2.88067	0.00203267
Cxcl9	2.82036	0.0441555
Mx1	2.81226	0.00544781
Tgtp2	2.81001	0.00180754
Oas1g	2.79109	0.0018738
Dhx58	2.74822	0.00104115
Ly6c2	2.7287	0.000449392
Ifi204	2.71664	0.02367
Oasl2	2.69083	0.000757635
Ifi44	2.67357	0.00199509
Oas1a	2.67119	0.00482679
Gbp5	2.67052	0.0147065
Ifit2	2.54743	0.0144484
H2-Q9	2.5429	0.017298
Gbp3	2.53464	0.00271082
Cfb	2.52453	0.00179211
Lgals3bp	2.50189	6.42771e-07
Rtp4	2.49638	9.09343e-06
Siglec1	2.49054	0.000253676
Gbp6	2.48976	0.0141146
H2-T23	2.46759	6.24189e-09
Gm5431	2.42781	0.0018068
Il18bp	2.38596	0.00412205
Trex1	2.38249	0.000642791
Gbp10	2.3682	0.0326509
Ear3	2.31235	0.0166916
Tap1	2.3036	0.000187276
Gm4951	2.29688	0.00467239
H2-Q8	2.25068	6.42771e-07
H2-Q6	2.22995	4.34961e-07
Usp18	2.21213	0.00546407
Irgm2	2.19783	0.000474118
H2-T9	2.17296	1.22562e-06
Slfn1	2.16931	0.0499558
Ifit1bl1	2.1284	0.0326509
Dbp	2.11786	0.00516953
Retnla	2.1129	0.0407334
Fcgr4	2.07695	0.0440505
Gpnmb	1.98946	0.0438892
Stat2	1.98927	0.00271082
H2-Q4	1.97323	3.68446e-08
H2-Q5	1.95852	0.000104936
H2-Q7	1.95331	0.00193273
Xaf1	1.93673	0.000549641
Ms4a6c	1.92351	0.016874
Cmpk2	1.91039	0.0431562
Lcn2	1.89349	0.00850052
H2-K1	1.84783	1.38137e-08
Bst2	1.84565	0.00271082
Rbm3	1.83874	0.00144423
Slc7a5	1.83309	1.22562e-06
Ddx60	1.82729	0.00965231
Clec7a	1.8172	0.0316302
Xdh	1.81602	0.00461148
Psmb8	1.80078	0.00434193
H2-Q1	1.80066	8.24972e-07
Phf11d	1.7984	0.0237513
Pim1	1.77987	0.0199225
H2-T22	1.76687	6.42871e-06
Mx2	1.75675	0.0225536
Sirpb1a	1.75675	0.0305272
LOC100038947	1.75212	0.0304988
Ctss	1.75175	0.00630186
Ly6e	1.74952	1.38137e-08
Cd68	1.74832	0.00142221
Chil3	1.74782	0.0384004
H2-L	1.73109	5.41785e-05
Dtx3l	1.7284	0.0116448
H2-D1	1.72677	3.38984e-08
Oas2	1.70793	0.0472142
Cybb	1.70208	0.0168585
Slfn2	1.68885	0.0311331
Lgals9	1.67828	0.00630186
AI607873	1.65719	0.0408635
Daxx	1.64993	0.0212801
Pak6	1.63481	0.0272056
Hsh2d	1.63377	0.0162194
Cirbp	1.61512	0.0340049
B2m	1.59213	1.22562e-06
Ear12	1.55346	0.0494961
Lrg1	1.55104	0.000348564
Ifitm3	1.54468	0.00781627
Ly6a	1.54463	5.84856e-06
B430306N03Rik	1.53895	0.0435851
Pnpla2	1.5387	0.0247846
Hmga1-rs1	1.5322	0.0342292
Epsti1	1.52812	0.0417328
Trim30a	1.5257	0.0367781
Sirpb1b	1.51705	0.0460992
Mpeg1	1.50293	0.00991209
Hist1h1d	-1.54426	0.000122913
Serpinh1	-1.54693	0.00931682
Cd209a	-1.86706	0.0267332
1810011O10Rik	-1.89801	0.000106183
Fos	-2.04061	0.00872675
Hsph1	-2.04625	2.51088e-05
Spon2	-2.04735	0.0212576
Cyp1a1	-2.17975	0.0402556
Dusp1	-2.18175	0.00806133
Hist1h1e	-2.25592	0.000140643
Mir6935	-3.66322	2.51637e-08

## Sheet: STable10. Omicron 6dpi
GeneID	Log2 Fold Change	FDR Value
Cxcl10	5.44956	3.0598e-05
Cxcl9	4.95131	9.30031e-06
Irf7	4.55687	3.39697e-11
Ly6i	4.55682	5.50746e-07
Saa3	4.30915	0.000370303
Gzmb	4.13464	0.000438955
Gm12250	3.91268	6.54566e-05
Ubd	3.90174	0.000197447
Il18bp	3.82124	5.50746e-07
Zbp1	3.78797	9.04423e-06
Rsad2	3.58037	0.000131874
Gzmk	3.51639	0.000114637
Oas3	3.4486	3.70126e-06
Tgtp1	3.44082	3.2398e-05
Ifi204	3.3346	0.000692787
Igtp	3.32421	1.25282e-05
Fcgr4	3.28853	0.000109628
Iigp1	3.26658	5.65234e-05
Cd274	3.25074	3.07348e-05
Tigit	3.24478	5.07278e-06
Isg15	3.22414	0.00025825
Cfb	3.21034	9.04423e-06
Pdcd1	3.18653	2.50302e-05
Gbp10	3.18205	0.000365707
Ccl4	3.16999	0.00274169
Gpnmb	3.1399	0.000106933
H2-Q9	3.11751	0.00047659
Fam26f	3.11306	0.00425945
Fcgr1	3.10002	0.00132188
Ms4a6d	3.07414	0.00011594
Ccl2	3.06989	0.018198
Retnla	3.01952	0.000370303
Gbp5	2.99317	0.00106064
Tgtp2	2.97602	0.00014434
Sprr1a	2.96189	0.00141688
Ccr5	2.95317	0.00371895
Irgm1	2.95274	2.07856e-05
Ly6c2	2.93396	2.07856e-05
AA467197	2.92929	0.0110641
Ctss	2.92424	5.50746e-07
Gbp6	2.89496	0.000615378
C3ar1	2.85932	0.000715986
Ifit3	2.84561	1.25256e-06
Apol9a	2.84399	8.5817e-06
Cd8b1	2.84171	0.00408795
Oas1g	2.83439	0.000242736
Ms4a6b	2.82146	0.000178783
Ms4a6c	2.81174	3.08965e-05
Ms4a4b	2.80237	0.000817565
Mnda	2.79084	0.00408795
Gbp2	2.76967	0.00417484
Mx1	2.76753	0.00105882
Ifi27l2a	2.76104	3.22455e-05
Acod1	2.75956	0.00199784
Oas1a	2.75825	0.000625379
Lag3	2.73536	2.98068e-05
Ifit1	2.73516	9.21731e-06
Ifit3b	2.72618	1.27135e-05
Ccl8	2.69724	0.0131729
Oasl1	2.65696	0.00906999
Arg1	2.63916	0.0339056
Clec7a	2.61215	0.00014434
Gm11127	2.60988	0.000365707
Ifi47	2.60936	0.00114807
Trem2	2.60336	0.00296563
Apod	2.5882	0.00125101
Apol9b	2.57807	1.34963e-05
H2-T23	2.57756	8.86957e-11
C1qb	2.56926	1.2674e-05
Ifit2	2.56576	0.00321898
Siglec1	2.56376	2.07856e-05
Cxcl13	2.56276	0.00425945
LOC100038947	2.55413	0.000119835
Ifi205	2.55334	0.0119967
Tap1	2.54591	6.66507e-06
Cd3e	2.52223	0.00177168
Gatm	2.51828	0.00887658
Serpina3g	2.51624	0.00489396
Slfn1	2.51127	0.00476724
Irgm2	2.50267	9.30031e-06
Cd68	2.49505	7.37173e-07
Cxcr3	2.48386	0.00174908
Pla1a	2.47012	0.000178783
Ctsw	2.46117	0.00233923
Sirpb1a	2.45167	0.000179387
Ms4a7	2.42426	0.00119439
Aif1	2.42187	0.00535367
Cxcr6	2.41636	0.00569882
Chil3	2.41197	0.00047659
Oasl2	2.39814	0.000547687
Il2rb	2.38365	0.00227267
Gm4951	2.38088	0.000516244
Cd3d	2.37756	0.00577669
Gbp3	2.36434	0.00112075
Serpina3f	2.36143	0.0262419
Mpeg1	2.34969	5.0257e-06
Slc26a4	2.34909	0.00786459
Lilrb4a	2.34407	0.000594052
Nkg7	2.33572	0.0054665
Phf11a	2.32122	0.00700525
H2-Q6	2.31457	3.03554e-08
AI607873	2.3111	0.000370303
Lgals3bp	2.30129	5.50746e-07
H2-K1	2.30034	5.87359e-12
H2-Q8	2.2964	7.44512e-08
Dhx58	2.29532	0.00158901
H2-T9	2.28988	7.44512e-08
Cybb	2.28925	0.000129677
Cd8a	2.28898	0.00417484
Apoc2	2.27484	0.00349267
H2-Q7	2.27274	3.85889e-05
Lilr4b	2.27206	0.00102897
Ccl5	2.23122	0.00158901
Cd3g	2.22387	0.00602004
Ifi44	2.2187	0.00305754
Batf2	2.21786	0.00835395
Cd300lf	2.21089	0.000262756
Lcn2	2.20864	0.000274292
Cyp4f18	2.20781	3.71495e-05
Tgfbi	2.20078	0.00241836
C1qa	2.19455	0.000234745
Epsti1	2.1939	0.000274292
Orm1	2.19232	0.00101966
Rgs16	2.19186	0.000249183
Icos	2.14835	0.00225069
Psmb8	2.14	8.14574e-05
Tlr9	2.13872	0.019829
H2-Q5	2.13635	4.35468e-06
Wfdc17	2.13551	0.0416199
Lpxn	2.11097	0.000624009
Slfn8	2.10808	0.00583855
H2-Q4	2.10368	8.06372e-10
Ido1	2.0948	0.0232264
AW112010	2.09088	0.00242089
Stat1	2.08693	0.00343673
C1qc	2.08121	0.000335282
Ifng	2.07749	0.0471437
Pla2g7	2.07558	0.00363979
Cd300c2	2.06294	8.93353e-05
Nlrc5	2.05895	0.00575222
Ifit1bl1	2.04714	0.0123698
Rtp4	2.04124	4.16557e-05
Msr1	2.03983	0.00405032
Ms4a4a	2.0397	0.000312287
Lrrc25	2.03848	0.0128615
Tnip3	2.03618	0.000312287
Phf11b	2.03576	0.0116626
Sirpb1b	2.03445	0.000797615
Tlr13	2.02669	0.000304459
Cst7	2.02555	0.00397089
Chil4	2.02382	0.0463577
Cd5	2.02329	0.0114894
B2m	2.01607	8.06372e-10
Ms4a8a	2.01143	7.38439e-06
Gm5431	1.99666	0.00305754
Ackr1	1.99563	0.0193331
Ptafr	1.99131	0.00827948
H2-D1	1.99069	8.86957e-11
Trex1	1.98091	0.00111203
Serpinb9b	1.97596	0.000438416
Cd180	1.97253	0.0181218
Slamf9	1.96872	0.00131313
Slc15a3	1.96628	0.00361894
2810417H13Rik	1.95888	0.00106267
Cldn4	1.95884	0.0148581
Tmem37	1.94715	0.00135566
Fcer1g	1.94707	0.00110751
Havcr2	1.9409	0.000120766
H2-T-ps	1.93384	2.69902e-07
Usp18	1.93209	0.00405472
Psmb9	1.9292	0.000438416
Cd72	1.92868	0.0257592
Gbp8	1.92543	0.0251062
H2-T22	1.91777	2.67543e-07
Pld4	1.89198	0.000359534
Clec4n	1.88977	0.00111203
Ctla4	1.88679	0.0058865
Ear3	1.88144	0.0221448
Clec12a	1.87926	0.0328287
Arl11	1.85983	0.000578705
Il1rn	1.8555	0.041101
Thy1	1.85369	0.0103284
Slfn2	1.85259	0.00382117
Clec4e	1.85022	0.0138877
Cd6	1.84268	0.00416763
H2-Q1	1.8391	9.59544e-08
Lcp2	1.83678	0.00839971
Gm4841	1.83176	0.018198
Themis2	1.81491	0.0154023
Clec4a3	1.81096	0.000615378
Xdh	1.81034	0.000847783
Gm21188	1.78736	0.0168925
Slc39a2	1.78146	0.000275122
Runx3	1.77447	0.00227868
Spp1	1.76937	0.0182176
Sema4d	1.7659	0.00341764
Il12rb1	1.75981	0.00752554
Slamf7	1.75968	0.0181218
Lat	1.754	0.0236268
Phf11d	1.75333	0.00754743
Csf2rb	1.74964	0.00130152
Rasa4	1.74092	0.000131874
Ch25h	1.73858	0.013889
Tnfrsf1b	1.73739	0.00242841
Tnfrsf4	1.73359	0.00406574
Tyrobp	1.72975	0.00107833
Trim30a	1.7242	0.0037154
B4galnt4	1.72348	0.00111203
Tbx21	1.71945	0.00305754
Pirb	1.71891	0.0150752
Tnfaip8l2	1.71845	0.0039019
Lck	1.7135	0.0175495
Xaf1	1.71269	0.00047659
H2-L	1.71157	9.30031e-06
Ccl1	1.69418	0.00715271
Itgb2	1.69357	0.00209418
Sh2d2a	1.6859	0.00138074
Hcls1	1.68536	0.00453447
Ifi27l2b	1.68528	0.00177168
Slc11a1	1.67982	0.0170024
Cyth4	1.67223	0.00418729
Stat2	1.67011	0.00333347
Ubash3a	1.66962	0.00461282
Hsd11b2	1.65862	0.00416763
Cd300a	1.65673	0.00106267
Selplg	1.65552	0.0025103
Cd52	1.65438	0.0262143
Gpr141	1.64982	0.0185516
Cd28	1.64919	0.00102897
Slc7a8	1.64372	0.0204811
Clca3a1	1.64329	0.00429732
Rbm3	1.64044	0.000988898
Gm4070	1.63882	0.0200142
Gbp7	1.63762	0.0120381
Bst2	1.63513	0.00180229
Tnfrsf9	1.63156	0.0110122
Ddx60	1.63107	0.00579444
Mcemp1	1.61666	0.000197447
Cotl1	1.61409	0.00102897
Pim1	1.60715	0.0115224
Dtx3l	1.60671	0.00497399
Bcl2a1b	1.60671	0.0239602
Sh2d1b1	1.60617	0.000365465
Mafb	1.60559	0.0143382
Tbxas1	1.60402	0.00902005
Igsf6	1.60377	0.0157549
Il2ra	1.60154	0.007659
Pstpip1	1.59899	0.0118772
Arg2	1.59818	0.0266257
Csf2rb2	1.59659	0.00440607
Tnfrsf12a	1.59322	0.00279126
Spi1	1.58791	0.00385281
Ear12	1.58593	0.0134465
Cd48	1.58088	0.00689817
Klra2	1.57684	0.00570734
Trim30d	1.55888	0.00312631
Gimap7	1.55845	0.0437436
Cd200r4	1.55786	0.00129862
F830016B08Rik	1.55763	0.00416763
Fcgr3	1.5525	0.0157549
Cd84	1.55219	0.000209454
Snx20	1.55184	0.0262596
Herc6	1.54468	0.0229883
Sla2	1.54216	0.00521856
Gm12185	1.53961	0.028571
Sit1	1.53959	0.00742407
Apobec1	1.53151	0.000714013
Acp5	1.53029	0.0044124
Gpr65	1.53012	0.013889
Was	1.52973	0.00458687
Laptm5	1.52883	0.000148405
Slc7a5	1.52533	8.31003e-06
Sp140	1.52376	0.001733
Sh3bp2	1.52144	0.00295591
Cd53	1.51869	0.00579607
Dnase1l3	1.50996	0.0233134
Adgre1	1.50935	0.0111132
Pik3ap1	1.5088	0.0448329
Fcgr2b	1.50791	0.0438826
B430306N03Rik	1.50706	0.0135551
Oas2	1.50673	0.0367202
Pira2	1.50649	0.00849042
Scn7a	-1.50348	0.0059333
Adamts17	-1.51672	0.000204652
Mgl2	-1.53555	0.00205526
Scn3b	-1.5419	0.0148457
Prdm8	-1.54795	7.81676e-06
Pcdh12	-1.5569	0.00883707
Fcrls	-1.56157	0.00167028
Itgb1bp2	-1.5617	0.0443588
Cd207	-1.59364	3.08965e-05
Cd79a	-1.59841	0.0283808
Zg16	-1.59959	0.040268
Serpinh1	-1.61919	0.00119755
Rnase1	-1.62226	0.0497984
Slc7a10	-1.62809	0.0205916
Ppbp	-1.63518	0.028136
Scgb1c1	-1.64696	0.0424528
1810011O10Rik	-1.65371	0.00014434
Dusp1	-1.66644	0.021016
Igfbp3	-1.66856	0.0430397
Fos	-1.68613	0.0112307
Egr1	-1.69883	0.0179623
Spon2	-1.7502	0.018198
Pax5	-1.77613	0.00194783
Cd19	-1.79339	0.0157549
Pnliprp1	-1.80958	0.0372305
Ackr4	-1.82204	0.00123322
Hist1h1d	-1.83099	8.07726e-07
Wfdc1	-1.86746	5.06359e-05
Hsph1	-1.91157	1.08602e-05
Rbp7	-1.91999	0.0460639
Pnlip	-2.02081	0.0188
Colq	-2.03811	0.0141679
Try4	-2.05788	0.0201525
Bpifa2	-2.06454	2.07856e-05
Ces1g	-2.07686	0.00320076
Aplnr	-2.10384	0.00827948
Apln	-2.11452	0.0148457
Cd209a	-2.17172	0.00144728
Fabp1	-2.24587	0.00230463
Cela2a	-2.42745	0.0110905
Mir6935	-2.44951	7.51209e-05
Hist1h1e	-2.47208	7.38439e-06
Ctrb1	-2.63645	0.0122315
Cyp1a1	-2.91227	0.000677313

[truncated: 3 more sheets: STable11. MA10 3dpi, STable12. MA10 6dpi, STable.13. Specific genes ]
